# Supplementary material
Source: publisher figshare collection journal article supplement (https://gsapubs.figshare.com/ndownloader/files/35908427)
Supplement: Supplementary file 1 [file 35908427]

## Sheet: This study
Electron microprobe analyses (wt.%) of minerals in Jiaohe peridotite xenoliths.
Sample	Mineral	SiO2	TiO2	Al2O3	Cr2O3	FeO	MnO	MgO	CaO	Na2O	K2O	NiO	Total	Mg#			Si	Ti	Al	Cr	Fe	Mn	Mg	Ca	Na	K	Ni	Total
Lherzolite																	Cation proportions, normalized to 3 cations and 4 oxygen atoms
17DSH01	Ol	40.834	-	-	-	9.7805	0.139	48.3555	-	-	-	0.344	99.4905	89.8095			1.00621				0.201553	0.00290109	1.7763				0.0068187	2.99379
17DSH02	Ol	40.4295	-	-	-	10.7225	0.1455	47.6005	0.0525	-	-	0.3895	99.39	88.7808			1.00272				0.222402	0.00305649	1.75993	0.00139511			0.00777077	2.99728
17DSH03	Ol	40.6795	-	-	-	10.127	0.129	47.84	0.088	-	-	0.3445	99.2355	89.3852			1.00676				0.2096	0.00270406	1.76499	0.00233345			0.00685824	2.99324
17DSH04	Ol	41.0155	-	-	-	10.093	0.1545	48.32	-	-	-	0.381	100.007	89.5111			1.00687				0.207209	0.00321243	1.76831				0.00752363	2.99313
17DSH05	Ol	40.527	-	-	-	9.64	0.149	48.215	0.036	-	-	0.358	98.956	89.9148			1.00411				0.199744	0.0031268	1.78082	0.000955663			0.007135	2.99589
17DSH06	Ol	40.6445	-	-	-	10.081	0.1395	48.4875	-	-	-	0.4185	99.8305	89.5547			1.00074				0.20758	0.0029092	1.77973				0.00828881	2.99926
17DSH07	Ol	40.619	-	-	-	10.005	0.148	47.694	0.074	-	-	0.401	98.961	89.4709			1.00772				0.207581	0.00310992	1.76391	0.00196701			0.00800255	2.99228
17DSH08	Ol	40.8415	-	-	-	10.2275	0.1595	47.925	0.0515	-	-	0.3745	99.6195	89.3081			1.00736				0.210967	0.00333215	1.76218	0.001361			0.00743039	2.99264
17DSH09	Ol	40.669	-	-	-	9.553	0.141	47.445	0.054	-	-	0.374	98.291	89.8509			1.01334				0.199065	0.00297572	1.76233	0.00144163			0.00749619	2.98666
17DSH10	Ol	40.587	-	-	-	10.077	0.157	47.664	0.052	-	-	0.425	99.019	89.3972			1.0072				0.209133	0.00329996	1.76329	0.00138261			0.00848388	2.9928
17DSH11	Ol	41.094	-	-	-	9.931	0.1585	48.202	0.0305	-	-	0.3995	99.825	89.6394			1.00944				0.204013	0.0032977	1.76511	0.00080273			0.00789396	2.99056
17DSH12	Ol	41.272	-	-	-	9.861	0.1235	48.163	0.043	-	-	0.397	99.8855	89.6974			1.01244				0.2023	0.00256602	1.76129	0.00113018			0.00783393	2.98756
17DSH13	Ol	41.3455	-	-	-	9.303	0.119	48.4615	0.0505	-	-	0.359	99.666	90.2778			1.01363				0.190737	0.00247102	1.77113	0.0013265			0.00707978	2.98637
17DSH14	Ol	40.441	-	-	-	10.3565	0.1445	48.109	0.0365	-	0.026	0.381	99.485	89.2247			1.00011				0.214191	0.00302672	1.7736	0.000967133		0.000820259	0.00757926	3.0003
17DSH15	Ol	40.3875	-	-	-	10.42	0.144	48.1905	0.036	-	-	0.385	99.5785	89.1821			0.99846				0.215433	0.00301526	1.77602	0.000953571			0.00765631	3.00154
17DSH16	Ol	40.676	-	-	-	10.291	0.1315	48.563	0.0365	-	-	0.3945	100.109	89.3751			0.99928				0.21143	0.00273623	1.77852	0.000960746			0.00779599	3.00072
Harzburgite
17DSH17	Ol	40.594	-	-	-	9.672	0.11	48.75	0.049	-	-	0.348	99.605	89.9846			0.999999				0.199258	0.00229514	1.79026	0.0012933			0.00689592	3
17DSH18	Ol	40.826	-	-	-	10.183	0.149	48.817	0.062	-	-	0.379	100.483	89.5239			0.999173				0.208421	0.00308865	1.78106	0.00162578			0.00746136	3.00083
17DSH19	Ol	41.207	-	-	0.06	8.909	0.128	49.339	-	-	-	0.416	100.094	90.802			1.00547			0.0011575	0.181798	0.00264538	1.79471				0.00816523	2.99395
17DSH20	Ol	41.534		-	-	8.629	0.138	49.99	0.041	-	-	0.431	100.818	91.1714			1.00497				0.174611	0.00282818	1.80317	0.00106292			0.00838884	2.99503
Sample	Mineral	SiO2	TiO2	Al2O3	Cr2O3	FeO	MnO	MgO	CaO	Na2O	K2O	NiO	Total	Mg#			Si	Ti	Al	Cr	Fe	Mn	Mg	Ca	Na	K	Ni	Total
Lherzolite																	Cation proportions, normalized to 4 cations and 6 oxygen atoms
17DSH01	Opx	56.61	0.073	3.677	0.362	6.424	0.175	32.882	0.405	0.052	-	0.063	100.723	90.1227			1.93722	0.00187933	0.148296	0.00979407	0.183845	0.00507227	1.67744	0.0148494	0.00345008		0.00173421	3.98358
17DSH02	Opx	56.836	0.138	4.266	0.293	6.529	0.137	32.195	0.529	0.093	-	0.12	101.139	89.7854			1.93657	0.00353739	0.17131	0.00789307	0.186045	0.00395374	1.63531	0.0193122	0.00614373		0.00328901	3.97337
17DSH03	Opx	56.682	0.127	4.357	0.343	6.185	0.131	32.409	0.647	0.078	-	0.109	101.068	90.3293			1.93105	0.00325497	0.174939	0.0092387	0.176217	0.00378005	1.64595	0.0236167	0.00515208		0.0029871	3.97618
17DSH04	Opx	56.243	0.069	3.848	0.27	6.442	0.133	32.287	0.772	0.067	-	0.102	100.233	89.9336			1.93587	0.0017867	0.156097	0.00734751	0.185434	0.00387737	1.65668	0.0284703	0.00447118		0.00282412	3.98286
17DSH05	Opx	56.805	0.082	3.764	0.295	6.237	0.113	32.981	0.382	0.065	-	0.044	100.768	90.4087			1.93959	0.00210635	0.151469	0.00796367	0.178098	0.00326798	1.67876	0.013975	0.00430305		0.00120851	3.98074
17DSH06	Opx	56.845	0.05	3.508	0.324	6.254	0.14	32.529	0.814	-	-	0.084	100.565	90.2644			1.9475	0.0012887	0.141644	0.00877606	0.179186	0.00406249	1.66135	0.0298797			0.00231494	3.976
17DSH07	Opx	56.221	0.084	4.018	0.334	6.497	0.132	32.28	0.528	0.098	-	0.15	100.348	89.8544			1.93293	0.00217266	0.162809	0.00907888	0.186806	0.00384388	1.65445	0.0194499	0.00653256		0.00414843	3.98222
17DSH08	Opx	55.613	0.11	4.369	0.263	6.587	0.153	31.794	0.533	0.066	-	0.104	99.594	89.5877			1.92676	0.00286708	0.178396	0.00720404	0.190854	0.00448974	1.6421	0.0197854	0.00443339		0.00289841	3.97979
17DSH09	Opx	56.165	0.057	3.733	0.373	5.922	0.124	32.492	0.61	-	-	0.11	99.624	90.7238			1.94013	0.00148127	0.151976	0.0101869	0.171078	0.00362799	1.67319	0.0225768			0.00305656	3.97731
17DSH10	Opx	56.055	0.1	4.221	0.206	6.618	0.148	32.077	0.49	0.06	-	0.112	100.091	89.6265			1.93161	0.00259239	0.171424	0.00561231	0.190719	0.00431963	1.64779	0.0180913	0.00400864		0.00310455	3.97928
17DSH11	Opx	56.003	0.041	3.633	0.362	6.494	0.158	32.26	0.488	-	-	0.105	99.564	89.853			1.94025	0.00106862	0.148342	0.0099157	0.188156	0.00463641	1.66615	0.0181148			0.00292624	3.97956
17DSH12	Opx	55.116	0.0365	3.9305	0.3635	6.4125	0.15	32.6865	0.456	-	-	0.0925	99.272	90.0855			1.91767	0.000955399	0.161174	0.00999931	0.186589	0.00442045	1.69539	0.0169992			0.00258889	3.99579
17DSH13	Opx	54.58	0.068	3.476	0.342	6.238	0.166	32.594	0.45	-	-	0.112	98.044	90.3044			1.9226	0.00180202	0.144307	0.00952467	0.183765	0.0049527	1.71158	0.0169838			0.00317357	3.99868
17DSH14	Opx	54.715	0.115	4.079	0.263	6.425	0.133	32.287	0.523	0.052	-	0.064	98.656	89.9575			1.91528	0.00302844	0.168279	0.00727864	0.188088	0.00394327	1.68483	0.0196153	0.00352914		0.00180211	3.99568
17DSH15	Opx	55.338	0.094	4.308	0.282	6.572	0.157	31.969	0.509	0.091	-	0.078	99.404	89.6599			1.92201	0.00245615	0.176343	0.00774371	0.190893	0.00461859	1.65525	0.0189416	0.00612792		0.00217922	3.98656
17DSH16	Opx	55.0065	0.095	4.033	0.391	6.433	0.1425	32.4645	0.437	0.0625	-	0.096	99.161	89.9958			1.91602	0.00248946	0.165564	0.0107679	0.187396	0.00420416	1.68577	0.0163093	0.00422091		0.00268988	3.99543
Harzburgite
17DSH17	Opx	56.785	-	1.911	0.509	6.058	0.175	32.931	0.603	0.195	-	0.13	99.315	90.6454			1.97173		0.0782033	0.0139733	0.175915	0.00514671	1.70459	0.0224335	0.0131277		0.00363104	3.98875
17DSH18	Opx	57.457	0.025	1.838	0.516	6.04	0.157	33.173	0.653	0.208	-	0.047	100.114	90.7323			1.97686	0.000647095	0.0745298	0.0140363	0.173793	0.00457521	1.70146	0.024072	0.0138751		0.00130079	3.98515
17DSH19	Opx	56.513	0.027	2.113	0.485	5.57	0.131	33.468	0.639	0.091	-	0.111	99.156	91.4608			1.96111	0.000704877	0.0864182	0.0133065	0.161648	0.00385038	1.73136	0.0237587	0.0061226		0.00309851	3.99138
17DSH20	Opx	56.882	-	2.154	0.623	5.444	0.144	33.542	0.602	-	-	0.072	99.497	91.6547			1.96494		0.0876942	0.017015	0.157273	0.00421323	1.72729	0.0222811			0.0020007	3.98271
Sample	Mineral	SiO2	TiO2	Al2O3	Cr2O3	FeO	MnO	MgO	CaO	Na2O	K2O	NiO	Total	Mg#			Si	Ti	Al	Cr	Fe	Mn	Mg	Ca	Na	K	Ni	Total
Lherzolite																	Cation proportions, normalized to 4 cations and 6 oxygen atoms
17DSH01	Cpx	53.106	0.488	6.227	0.983	2.172	0.102	14.338	20.778	1.602	-	0.071	99.867	92.1674			1.91638	0.0132481	0.26483	0.0280453	0.0655478	0.00311757	0.771311	0.803356	0.112083		0.00206097	3.97998
17DSH02	Cpx	53.549	0.643	7.401	0.664	2.751	0.092	13.853	19.249	2.001	-	0.032	100.235	89.9762			1.91753	0.017322	0.312344	0.0187987	0.0823839	0.00279034	0.7395	0.738526	0.138924		0.000921756	3.96904
17DSH03	Cpx	53.3205	0.557	5.686	0.821	2.842	0.0855	15.925	19.9895	1.0985	-	0.074	100.369	90.8995			1.913	0.0150339	0.240425	0.0232881	0.0852721	0.00259816	0.851735	0.768406	0.0764121		0.00213564	3.97831
17DSH04	Cpx	53.132	0.507	6.669	0.788	2.309	0.083	13.918	20.655	1.746	-	0.03	99.849	91.4855			1.91642	0.0137574	0.283496	0.0224713	0.0696497	0.00253566	0.748367	0.798226	0.122101		0.000870423	3.97789
17DSH05	Cpx	52.932	0.48	6.509	0.909	2.232	0.08	13.958	20.53	1.901	-	0.103	99.634	91.7677			1.9151	0.013065	0.277549	0.026002	0.067535	0.00245156	0.752836	0.795846	0.133351		0.00299768	3.98673
17DSH06	Cpx	53.948	0.31	4.885	0.629	2.357	0.056	14.917	22.409	1.008	-	0.059	100.586	91.8576			1.93785	0.00837724	0.206805	0.0178634	0.0708052	0.00170377	0.798784	0.862449	0.0702013		0.00170479	3.97654
17DSH07	Cpx	52.925	0.419	5.887	0.862	2.531	0.086	14.69	20.628	1.465	-	0.065	99.564	91.1863			1.91789	0.0114228	0.251425	0.0246967	0.0767036	0.00263961	0.793575	0.800915	0.10293		0.00189475	3.98409
17DSH08	Cpx	53.62	0.4115	4.881	0.8775	2.438	0.0735	15.639	20.391	1.397	-	0.0665	99.8045	91.9579			1.93575	0.011176	0.207674	0.025046	0.0736068	0.00224744	0.841657	0.78873	0.0977821		0.00193117	3.9856
17DSH09	Cpx	53.612	0.18	4.139	0.769	2.529	0.078	15.578	21.825	0.725	-	0.068	99.503	91.6528			1.94635	0.00491616	0.177095	0.0220726	0.0767836	0.00239846	0.84309	0.848945	0.0510313		0.00198583	3.97467
17DSH10	Cpx	52.655	0.638	6.763	0.826	2.648	0.078	14.1	19.575	1.786	-	0.066	99.136	90.4686			1.91168	0.0174257	0.289378	0.0237096	0.0803996	0.00239854	0.763128	0.761453	0.125718		0.0019275	3.97721
17DSH11	Cpx	53.849	0.314	5.141	0.823	2.336	0.098	14.975	21.969	0.982	-	0.036	100.525	91.9531			1.93337	0.00848128	0.217538	0.0233617	0.0701407	0.00298017	0.801506	0.845111	0.0683578		0.00103971	3.97188
17DSH12	Cpx	51.975	0.22	5.189	0.82	2.35	0.076	14.856	21.651	1.2	-	0.061	98.399	91.8492			1.91304	0.00609181	0.225094	0.0238623	0.0723366	0.00236931	0.815144	0.853834	0.0856348		0.00180607	3.99921
17DSH13	Cpx	52.049	0.174	4.707	0.832	2.159	0.074	15.047	22.272	0.958	-	0.043	98.315	92.5503			1.91834	0.00482457	0.204461	0.0242441	0.0665469	0.00231007	0.826737	0.879509	0.0684573		0.00127485	3.99671
17DSH14	Cpx	51.812	0.643	7.126	0.738	2.55	0.077	13.926	19.971	1.853	-	0.025	98.721	90.6845			1.89283	0.0176721	0.306817	0.0213161	0.0779082	0.0023826	0.758424	0.781715	0.13125		0.000734678	3.99105
17DSH15	Cpx	51.743	0.415	6.474	0.765	2.61	0.094	14.135	20.399	1.776	-	0.105	98.516	90.6137			1.8993	0.01146	0.28007	0.022201	0.0801205	0.00292246	0.773466	0.802265	0.126394		0.00310032	4.0013
17DSH16	Cpx	52.16	0.409	6.491	0.969	2.335	0.089	14.089	20.259	1.997	-	0.106	98.917	91.4934			1.9046	0.0112353	0.279337	0.0279742	0.0713039	0.00275254	0.766918	0.792593	0.141379		0.00311348	4.0012
Harzburgite
17DSH17	Cpx	52.762	0.082	3.266	3.341	3.108	0.14	15.924	18.401	1.597	-	0.033	98.664	90.1313			1.94061	0.00226896	0.141575	0.0971545	0.0956004	0.00436138	0.873118	0.725146	0.113884		0.000976352	3.9947
17DSH18	Cpx	52.606	0.067	3.001	3.695	2.469	0.113	15.279	19.65	1.483	-	-	98.382	91.6882			1.94322	0.0018619	0.130649	0.107912	0.0762728	0.00353545	0.841367	0.777708	0.106211		0	3.98874
17DSH19	Cpx	54.438	0.078	1.95	1.905	2.483	0.08	17.328	19.564	1.223	-	0.044	99.103	92.5594			1.98126	0.00213565	0.0836424	0.0548156	0.075575	0.00246609	0.940139	0.762895	0.0862992		0.00128816	3.99052
17DSH20	Cpx	53.678	0.062	2.823	1.321	1.972	0.064	16.608	22.059	0.725	-	0.117	99.429	93.7549			1.95311	0.00169714	0.121058	0.0380016	0.0600066	0.00197237	0.900848	0.85997	0.0511457		0.00342446	3.99123
Sample	Mineral	SiO2	TiO2	Al2O3	Cr2O3	FeO	MnO	MgO	CaO	Na2O	K2O	NiO	Total	Mg#	Cr#		Si	Ti	Al	Cr	Fe	Mn	Mg	Ca	Na	K	Ni	Total
Lherzolite																	Cation proportions, normalized to 3 cations and 4 oxygen atoms
17DSH01	Sp	-	0.036	55.11	13.299	11.239	0.112	19.431	-	-	-	0.362	99.616	75.5012	13.9329			0.000712696	1.70918	0.276691	0.247341	0.00249634	0.762264				0.00766285	3.00635
17DSH02	Sp	-	0.135	60.202	7.709	10.58	0.094	20.593	-	-	-	0.373	99.731	77.6265	7.91068			0.00260917	1.82278	0.156581	0.22731	0.0020454	0.788671				0.00770827	3.00771
17DSH03	Sp	-	0.12	57.808	9.569	10.414	0.089	20.842	0.038	0.061	-	0.352	99.321	78.1062	9.99458			0.00234544	1.77005	0.196554	0.226269	0.00195847	0.807217	0.00105779	0.00307268		0.0073564	3.01589
17DSH04	Sp	-	0.042	58.605	9.37	10.846	0.083	20.309	-	-	-	0.432	99.741	76.9469	9.68666			0.000817813	1.7877	0.191742	0.234769	0.00181956	0.783613				0.00899432	3.00946
17DSH05	Sp	-	0.068	56.488	11.566	10.209	0.109	20.278	-	-	-	0.37	99.138	77.9768	12.0767			0.00133886	1.74236	0.239322	0.223447	0.00241621	0.791149				0.00778945	3.00782
17DSH06	Sp	-	0.051	56.853	11.243	11.397	0.127	19.43	-	-	-	0.382	99.493	75.2411	11.7124			0.0010042	1.75372	0.232652	0.249464	0.00281539	0.75811				0.00804256	3.00581
17DSH07	Sp	-	0.083	56.918	11.093	10.954	0.112	20.078	-	-	-	0.41	99.662	76.566	11.5625			0.001628	1.74897	0.228665	0.238844	0.0024733	0.780378				0.00859884	3.00956
17DSH08	Sp	-	0.079	58.828	9.192	10.135	0.094	20.339	-	-	-	0.405	99.087	78.1528	9.4875			0.00154149	1.79827	0.188494	0.219839	0.00206503	0.786416				0.00844986	3.00508
17DSH09	Sp	-	0.073	53.691	14.496	10.692	0.093	19.725	-	-	-	0.322	99.157	76.6819	15.3345			0.00145573	1.67732	0.303795	0.237019	0.00208797	0.779442				0.00686585	3.00799
17DSH10	Sp	0.038	0.099	58.642	8.455	11.1	0.126	20.242	-	-	-	0.41	99.124	76.4743	8.81913		0.000988189	0.00193681	1.79728	0.173836	0.241402	0.00277527	0.784717				0.00857661	3.01152
17DSH11	Sp	0.044	0.048	55.788	11.735	11.131	0.104	19.715	-	-	-	0.357	98.923	75.9455	12.3661		0.00115961	0.000951688	1.73281	0.244518	0.245332	0.00232151	0.774566				0.00756836	3.00923
17DSH12	Sp	0.06	0.036	56.011	12.223	11.082	0.116	19.437	-	-	-	0.334	99.321	75.7662	12.7699		0.00157585	0.000711314	1.73376	0.253811	0.243413	0.00258048	0.761021				0.00705644	3.00393
17DSH13	Sp	0.056	0.046	53.66	14.138	11.521	0.114	19.294	-	-	-	0.34	99.188	74.9072	15.02		0.0014876	0.00091929	1.67997	0.296932	0.255947	0.00256497	0.764056				0.0072653	3.00914
17DSH14	Sp	-	0.08	59.478	8.218	10.775	0.133	20.291	-	-	-	0.385	99.401	77.0475	8.48263			0.0015562	1.81254	0.168002	0.233002	0.0029128	0.782146				0.00800786	3.00817
17DSH15	Sp	-	0.097	57.719	9.918	10.992	0.138	20.089	-	-	-	0.357	99.325	76.5137	10.3358			0.00190172	1.77276	0.204349	0.239562	0.00304605	0.780443				0.00748381	3.00954
17DSH16	Sp	0.064	0.068	56.234	11.528	10.989	0.149	19.563	-	-	-	0.336	98.954	76.0385	12.0896		0.0016835	0.00134566	1.74334	0.239748	0.241742	0.00331969	0.767134				0.00710963	3.00543
Harzburgite
17DSH17	Sp	-	0.142	25.026	44.291	16.603	0.271	13.587	-	-	-	0.136	100.088	59.3288	54.2804			0.00325049	0.897445	1.06549	0.422486	0.00698413	0.616299				0.00332873	3.01528
17DSH18	Sp	-	0.142	23.782	46.023	15.902	0.266	14.376	-	-	-	0.179	100.716	61.7077	56.4878			0.00323878	0.849763	1.10317	0.403191	0.00683059	0.64974				0.00436542	3.0203
17DSH19	Sp	-	0.0565	27.367	42.1265	14.2635	0.243	15.4175	-	0.055	-	0.146	99.693	65.8327	50.8027			0.00127154	0.964859	0.996344	0.356839	0.00615701	0.687547		0.00318998		0.00351328	3.01972
17DSH20	Sp	-	0.079	28.0125	41.3115	14.0345	0.215	15.3635	0.0505	-	-	0.158	99.2765	66.1172	49.7316			0.00177892	0.988185	0.97763	0.351312	0.00545069	0.685533	0.00161955			0.00380423	3.01531
Detection Limit (DL)		0.033	0.026	0.046	0.056	0.026	0.016	0.021	0.02	0.04	0.026	0.028
Ol, olivine; Opx, orthopyroxene; Cpx, clinopyroxene; Sp, spinel.
Mg# = 100×Mg/(Mg +Fetotal) molar; Cr# = 100×Cr/(Cr +Al) molar.
Analyses were performed at China University of Geosciences, Wuhan.
"-" denotes below the detection limit (DL).
The whole dataset for Cr# of the spinel shows homogeneous compositional characteristics of individual samples.
Sample	Mineral	SiO2	TiO2	Al2O3	Cr2O3	FeO	MnO	MgO	CaO	Na2O	K2O	NiO	Total	Mg#	Cr#
Lherzolite
17DSH01	Sp1-c	-	0.031	54.732	13.321	11.433	0.122	19.168	-	-	-	0.373	99.18	74.9282	14.0356
	Sp1-r	-	0.052	55.121	13.082	11.159	0.104	19.613	-	-	-	0.398	99.529	75.8045	13.7345
	Sp2-c	-	0.028	54.97	13.428	11.339	0.126	19.326	-	-	-	0.341	99.558	75.2362	14.0799
	Sp2-r	-	0.032	55.616	13.363	11.026	0.098	19.618	-	-	-	0.337	100.09	76.0284	13.881
17DSH02	Sp1-c	-	0.131	60.115	7.824	10.707	0.095	20.493	-	-	-	0.371	99.736	77.3334	8.0299
	Sp1-r	-	0.137	60.518	7.626	10.506	0.083	20.822	-	-	-	0.393	100.085	77.9389	7.79447
	Sp2-c	-	0.127	59.848	7.724	10.632	0.093	20.391	-	-	-	0.346	99.161	77.3691	7.96799
	Sp2-r	-	0.144	60.327	7.663	10.476	0.104	20.664	-	-	-	0.382	99.76	77.857	7.85217
17DSH03	Sp1-c	-	0.111	57.423	9.519	10.746	0.081	20.699	-	-	-	0.345	98.924	77.4448	10.0076
	Sp2-c	-	0.117	57.848	9.813	10.485	0.088	20.784	0.036	0.066	-	0.351	99.588	77.9419	10.217
	Sp2-r	-	0.132	58.152	9.374	10.01	0.098	21.042	0.042	0.058	-	0.361	99.269	78.9345	9.75852
17DSH04	Sp1-c	-	0.041	58.591	9.333	11.01	0.083	20.189	-	-	-	0.478	99.725	76.5734	9.65419
	Sp2-c	-	0.048	58.736	9.602	10.648	0.091	20.428	-	-	-	0.404	99.957	77.3745	9.88285
	Sp3-c	-	0.038	58.488	9.176	10.881	0.074	20.311	-	-	-	0.413	99.381	76.8914	9.52237
17DSH05	Sp1-c	-	0.058	56.117	11.714	10.41	0.126	20.421	-	-	-	0.352	99.198	77.7619	12.2832
	Sp2-c	-	0.072	56.747	11.395	10.018	0.094	20.093	-	-	-	0.388	98.807	78.1433	11.8715
	Sp3-c	-	0.075	56.601	11.588	10.198	0.107	20.319	-	-	-	0.369	99.257	78.0299	12.0757
17DSH06	Sp1-c	-	0.042	56.738	11.041	11.273	0.111	19.366	-	-	-	0.393	98.964	75.3832	11.5469
	Sp1-r	-	0.057	57.211	11.391	11.476	0.14	19.626	-	-	-	0.371	100.272	75.2994	11.7829
	Sp2-c	-	0.054	56.61	11.296	11.443	0.131	19.298	-	-	-	0.382	99.214	75.0386	11.8056
17DSH07	Sp1-c	-	0.096	56.726	11.198	10.822	0.108	20.098	-	-	-	0.408	99.456	76.8006	11.6941
	Sp2-c	-	0.07	57.111	10.988	11.086	0.116	20.058	-	-	-	0.412	99.841	76.3324	11.4313
17DSH08	Sp1-c	-	0.083	59.011	9.083	10.282	0.084	20.134	-	-	-	0.422	99.099	77.7311	9.35918
	Sp2-c	-	0.072	58.519	9.322	10.134	0.101	20.51	-	-	-	0.388	99.046	78.2971	9.65463
	Sp3-c	-	0.081	58.954	9.171	9.988	0.097	20.374	-	-	-	0.405	99.07	78.4303	9.44956
17DSH09	Sp1-c	-	0.082	53.588	14.522	10.711	0.099	19.811	-	-	-	0.344	99.157	76.7279	15.3828
	Sp2-c	-	0.064	53.794	14.47	10.672	0.087	19.639	-	-	-	0.3	99.026	76.6372	15.2864
17DSH10	Sp1-c	-	0.105	58.787	8.358	11.226	0.133	20.118	-	-	-	0.423	99.15	76.1592	8.70714
	Sp2-c	0.038	0.093	58.498	8.552	10.973	0.119	20.367	-	-	-	0.397	99.037	76.7906	8.93127
17DSH11	Sp1-c	-	0.042	55.501	11.953	11.254	0.111	19.622	-	-	-	0.361	98.844	75.6572	12.6237
	Sp1-r	0.044	0.049	55.975	11.545	11.011	0.098	19.815	-	-	-	0.354	98.891	76.2347	12.1545
	Sp2-c	-	0.052	55.887	11.706	11.128	0.104	19.709	-	-	-	0.357	98.943	75.9448	12.3201
17DSH12	Sp1-c	0.048	0.031	55.829	12.351	11.187	0.105	19.372	-	-	-	0.317	99.24	75.5308	12.923
	Sp1-r	0.072	0.039	56.231	12.083	10.982	0.126	19.512	-	-	-	0.342	99.387	76.0025	12.5989
	Sp2-c	-	0.037	55.972	12.236	11.078	0.116	19.426	-	-	-	0.343	99.208	75.7624	12.7895
17DSH13	Sp1-c	0.056	0.042	53.529	14.182	11.488	0.108	19.305	-	-	-	0.332	99.042	74.9718	15.091
	Sp2-c	-	0.05	53.791	14.094	11.555	0.121	19.283	-	-	-	0.348	99.242	74.841	14.9493
17DSH14	Sp1-c	-	0.072	59.632	8.107	10.661	0.122	20.442	-	-	-	0.391	99.427	77.3652	8.35783
	Sp2-c	-	0.087	59.329	8.223	10.81	0.136	20.08	-	-	-	0.404	99.069	76.8044	8.50686
	Sp3-c	-	0.08	59.472	8.324	10.854	0.14	20.351	-	-	-	0.361	99.582	76.9704	8.58345
17DSH15	Sp1-c	-	0.088	57.922	9.884	11.018	0.131	19.974	-	-	-	0.344	99.361	76.3677	10.2716
	Sp2-c	-	0.103	57.548	10.112	10.809	0.142	20.189	-	-	-	0.362	99.265	76.9023	10.5446
	Sp3-c	-	0.101	57.688	9.758	11.148	0.141	20.105	-	-	-	0.366	99.307	76.2739	10.1909
17DSH16	Sp1-c	0.051	0.073	56.141	11.621	11.105	0.139	19.483	-	-	-	0.325	98.938	75.7715	12.193
	Sp2-c	0.077	0.063	56.328	11.435	10.874	0.158	19.643	-	-	-	0.347	98.925	76.3035	11.9862
Harzburgite
17DSH17	Sp1-c	-	0.138	25.273	44.178	16.701	0.282	13.471	-	-	-	0.131	100.174	58.9795	53.9732
	Sp2-c	-	0.146	24.779	44.404	16.505	0.261	13.702	-	-	-	0.141	99.938	59.6746	54.5897
17DSH18	Sp1-c	-	0.151	24.674	45.962	15.701	0.258	14.168	-	-	-	0.166	101.08	61.6639	55.548
	Sp2-c	-	0.131	23.184	46.023	16.106	0.272	14.762	-	-	-	0.182	100.66	62.0321	57.1127
	Sp3-c	-	0.144	23.489	46.083	15.899	0.268	14.197	-	-	-	0.188	100.268	61.4157	56.8242
17DSH19	Sp1-c	-	0.058	27.736	41.752	14.33	0.26	15.358	-	0.051	-	0.109	99.654	65.6408	50.2447
	Sp2-c	-	0.055	26.998	42.601	14.197	0.226	15.477	-	0.059	-	0.183	99.796	66.0242	51.4218
17DSH20	Sp1-c	-	0.08	28.521	40.78	13.91	0.199	15.684	0.044	-	-	0.176	99.394	66.7762	48.9582
	Sp2-c	-	0.078	27.504	41.843	14.159	0.231	15.043	0.057	-	-	0.14	99.055	65.4439	50.5091
c, core; r, rim.

## Sheet: Ref. Ol
Sample	Mineral	Locality	Reference	SiO2	TiO2	Al2O3	Cr2O3	FeO	MnO	MgO	CaO	Na2O	K2O	NiO	Total	Mg#
northwestern NEC
KL3-10	Ol	Keluo	Zhang et al. (2011)	41.2363	0.00166667	0.007	0.0123333	8.114	0.110667	50.7057	0.008	0.011	0.00433333	0.405	100.616	91.7624
KL3-24	Ol	Keluo	Zhang et al. (2011)	41.1237	0.000666667	0	0.011	8.09367	0.107	50.29	0	0.0376667	0.0186667	0.39	100.072	91.719
KL3-26	Ol	Keluo	Zhang et al. (2011)	41.2647	0.008	0.008	0.0163333	9.03833	0.123	49.5227	0.007	0.0173333	0.00533333	0.391333	100.402	90.7123
KL3-27-1	Ol	Keluo	Zhang et al. (2011)	41.119	0.007	0.0075	0.004	9.038	0.1555	49.6865	0.0075	0.0165	0.011	0.322	100.374	90.7404
KL3-27-2	Ol	Keluo	Zhang et al. (2011)	40.1117	0.0176667	0	0.0123333	11.1608	0.192	48.1157	0.0153333	0.00516667	0.006	0.348667	99.9853	88.4856
KL3-28	Ol	Keluo	Zhang et al. (2011)	40.4837	0.00466667	0	0.02	9.53067	0.152333	49.136	0.00366667	0.0226667	0.00166667	0.349667	99.705	90.1865
KL3-30	Ol	Keluo	Zhang et al. (2011)	40.9623	0.000333333	0	0.0276667	8.95333	0.126333	49.5593	0	0.02	0.015	0.402333	100.067	90.7978
KL3-31	Ol	Keluo	Zhang et al. (2011)	40.436	0	0.00833333	0.059	8.83933	0.136	48.988	0.014	0.0273333	0.00633333	0.361333	98.8757	90.808
KL3-38	Ol	Keluo	Zhang et al. (2011)	40.699	0.0145	0.0055	0.013	9.1215	0.125	49.0965	0.0285	0.026	0	0.394	99.5235	90.5612
KL3-40	Ol	Keluo	Zhang et al. (2011)	41.2007	0.00225	0.001	0.0065	8.39475	0.12325	50.2623	0.0105	0.009	0.00425	0.36325	100.378	91.433
KL3-41	Ol	Keluo	Zhang et al. (2011)	40.9733	0.015	0	0.0113333	8.73033	0.116667	49.655	0.000333333	0.0176667	0.006	0.37	99.8957	91.0221
KL3-49	Ol	Keluo	Zhang et al. (2011)	40.99	0.00633333	0.000333333	0	7.966	0.100333	50.3087	0.02	0.0103333	0.00466667	0.381	99.7877	91.8418
KL3-53	Ol	Keluo	Zhang et al. (2011)	40.653	0.0106667	0.003	0.013	8.555	0.126	49.4853	0	0.0193333	0.00433333	0.367667	99.2373	91.159
KL3-56	Ol	Keluo	Zhang et al. (2011)	40.7607	0.013	0.00233333	0.0196667	9.42	0.145	48.6213	0.00233333	0.016	0.00433333	0.371333	99.376	90.1967
08KL-01	Ol	Keluo	Zhang et al. (2011)	41.195	0.0106667	0.048	0.00333333	10.1463	0.136333	48.475	0.024	0.0186667	0.0223333	0.339	100.419	89.4917
08KL-02	Ol	Keluo	Zhang et al. (2011)	40.7295	0.05475	0	0.02775	8.92175	0.14425	49.6253	0.02675	0.01725	0.00375	0.411	99.962	90.8383
08KL-03	Ol	Keluo	Zhang et al. (2011)	40.7337	0.0226667	0	0.008	10.712	0.113333	48.4553	0.041	0.00566667	0.00466667	0.405333	100.502	88.9665
08KL-04	Ol	Keluo	Zhang et al. (2011)	40.627	0.01325	0.00075	0.004	10.441	0.13	48.777	0.02525	0.012	0.00325	0.37	100.403	89.279
08KL-05	Ol	Keluo	Zhang et al. (2011)	40.6	0.000333333	0	0.0106667	10.5913	0.175333	48.5343	0.0336667	0.00866667	0.00166667	0.387333	100.343	89.0931
08KL-07	Ol	Keluo	Zhang et al. (2011)	40.1578	0.002	0	0.0085	9.1195	0.1345	49.6172	0.04575	0.0015	0.0115	0.3915	99.4897	90.6529
08KL-09	Ol	Keluo	Zhang et al. (2011)	39.7215	0.0125	0	0.007	11.49	0.2005	47.6895	0.01	0.0095	0.016	0.3955	99.552	88.0931
08KL-10	Ol	Keluo	Zhang et al. (2011)	40.5258	0.00475	0.00525	0.0125	11.058	0.16575	48.5322	0.0395	0.021	0.011	0.398	100.774	88.6665
08KL-11	Ol	Keluo	Zhang et al. (2011)	41.1033	0.015	0.00133333	0.004	9.08433	0.124333	49.6493	0.0116667	0.013	0.00666667	0.391667	100.405	90.691
08KL-12	Ol	Keluo	Zhang et al. (2011)	40.807	0	0.005	0.00333333	10.339	0.155	49.0903	0.000666667	0.001	0	0.363333	100.765	89.4333
08KL-13	Ol	Keluo	Zhang et al. (2011)	40.735	0.019	0.00566667	0.037	9.47633	0.117333	49.4353	0.0446667	0.0166667	0.0116667	0.395667	100.294	90.2904
09NMB33	Ol	Nuomin	Hao et al. (2016)	40.85	0.04	0.01	0.02	9.77	0.1	48.71	0.05			0.43	99.98	89.8859
09NMB36	Ol	Nuomin	Hao et al. (2016)	41.01	0.06	0.03	0.01	9.22	0.08	48.91	0.07			0.35	99.74	90.4361
09NMB37	Ol	Nuomin	Hao et al. (2016)	40.55	0	0.01	0.06	9.09	0.08	48.94	0.05			0.37	99.15	90.5635
09NMB38	Ol	Nuomin	Hao et al. (2016)	41.17	0.01	0.02	0.04	8.2	0.08	50	0.07			0.35	99.94	91.5748
09NMB40	Ol	Nuomin	Hao et al. (2016)	40.85	0	0.02	0.03	9.03	0.1	49.1	0.07			0.38	99.58	90.6477
09NMB41	Ol	Nuomin	Hao et al. (2016)	40.46	0	0.01	0.01	8.13	0.09	50.15	0.04			0.46	99.35	91.6637
09NMB42	Ol	Nuomin	Hao et al. (2016)	40.84	0.06	0.02	0.04	8.4	0.07	49.35	0.07			0.42	99.27	91.2835
09NMB49	Ol	Nuomin	Hao et al. (2016)	40.57	0.03	0.01	0.01	9.18	0.11	49.21	0.06			0.42	99.6	90.5263
NM2-01	Ol	Nuomin	Zhang et al. (2019)	40.76	0.01	0.03	0.05	8.89	0.13	48.98	0.08	0.04		0.37	99.33	90.7588
NM2-02	Ol	Nuomin	Zhang et al. (2019)	40.76	0.03	0.01	0.02	8.81	0.13	49.49	0.06	0.02		0.37	99.7	90.9202
NM2-04	Ol	Nuomin	Zhang et al. (2019)	41.17	0.02	0.02	0.02	8.61	0.15	50.1	0.07	0.01	0.01	0.41	100.59	91.2067
NM2-07	Ol	Nuomin	Zhang et al. (2019)	40.24	0.03	0.01	0.05	10.65	0.15	48.39	0.06	0.01	0.01	0.4	100.02	89.0102
NM2-20	Ol	Nuomin	Zhang et al. (2019)	40.94	0.01		0.02	9.68	0.13	49.08	0.01	0.02	0.01	0.35	100.25	90.0378
NM2-23	Ol	Nuomin	Zhang et al. (2019)	41.31		0.02	0.04	8.47	0.12	49.96	0.08	0.01		0.39	100.41	91.3152
NM2-24	Ol	Nuomin	Zhang et al. (2019)	41.37	0.01	0.03	0.01	7.7	0.11	50.65	0.04	0.01	0.01	0.38	100.31	92.1418
NM2-27	Ol	Nuomin	Zhang et al. (2019)	40.38	0.04	0.03	0.04	10.57	0.12	48.39	0.09	0.01		0.42	100.1	89.0837
NM2-29	Ol	Nuomin	Zhang et al. (2019)	40.71	0.03	0.02	0.02	9.49	0.12	49.09	0.05		0.01	0.38	99.93	90.216
NM2-34	Ol	Nuomin	Zhang et al. (2019)	41.15	0.02	0.02	0.03	7.99	0.12	50.02	0.08	0.01	0.01	0.38	99.83	91.7759
NM2-37	Ol	Nuomin	Zhang et al. (2019)	40.29	0.03	0.04	0.02	9.65	0.13	47.97	0.04	0.01	0.01	0.37	98.55	89.8591
NM2-39	Ol	Nuomin	Zhang et al. (2019)	40.67	0.02	0.01	0.01	10.02	0.1	49	0.04	0.01	0.01	0.37	100.26	89.7088
NM2-48	Ol	Nuomin	Zhang et al. (2019)	40.57	0.01	0.02	0.03	8.78	0.13	49.66	0.07	0.01		0.38	99.66	90.9765
NM2-50	Ol	Nuomin	Zhang et al. (2019)	41.17	0.01		0.02	7.38	0.14	50.78	0.04			0.37	99.92	92.4615
NM2-51	Ol	Nuomin	Zhang et al. (2019)	40.98			0.04	8.5	0.13	49.32	0.06	0.01		0.42	99.44	91.184
NM2-55	Ol	Nuomin	Zhang et al. (2019)	40.29	0	0.01	0.01	9.39	0.14	48.92	0.01	0.02		0.32	99.09	90.2787
NM2-56	Ol	Nuomin	Zhang et al. (2019)	41.04		0.02	0.02	8.49	0.13	49.93	0.1	0.04	0.01	0.41	100.2	91.2917
BLS01A	Ol	Nuomin	Tian et al. (2020)	41.0083	0	0	0.035	8.79833	0.125	49.6283	0.0583333			0.383333	100.037	90.9541
BLS02A	Ol	Nuomin	Tian et al. (2020)	41.135	0	0	0.00333333	8.17333	0.116667	50.325	0.00333333			0.388333	100.145	91.6497
BLS02B	Ol	Nuomin	Tian et al. (2020)	40.9783	0	0.0116667	0	9.14	0.13	49.51	0.005			0.37	100.145	90.6155
BLS03	Ol	Nuomin	Tian et al. (2020)	40.8533	0.085	0.02	0.01	9.15	0.173333	48.98	0.0766667	0.005	0.0133333	0.426667	99.7933	90.5141
BLS06B	Ol	Nuomin	Tian et al. (2020)	41.3	0.01	0.025	0.005	9.155	0.09	48.6	0.08	0.01	0.02	0.46	99.755	90.4423
BLS07	Ol	Nuomin	Tian et al. (2020)	40.6617	0.00333333	0.0666667	0.0283333	9.25667	0.12	49.195	0.08			0.371667	99.7833	90.4521
BLS09	Ol	Nuomin	Tian et al. (2020)	40.49	0.04	0.0225	0.055	9.455	0.11	49.5775	0.08	0.0225	0.01	0.405	100.267	90.3352
BLS10	Ol	Nuomin	Tian et al. (2020)	40.7645	0.0333333	0.0157143	0.0285714	8.71545	0.141818	49.2427	0.0745455	0.025	0.0171429	0.408182	99.467	90.9678
BLS12A	Ol	Nuomin	Tian et al. (2020)	40.9467	0.00333333	0.0283333	0.0333333	9.14167	0.118333	49.3667	0.0766667			0.388333	100.103	90.5892
BLS16	Ol	Nuomin	Tian et al. (2020)	41.1433	0.00333333	0.0166667	0.0216667	8.655	0.121667	49.9883	0.0616667			0.383333	100.395	91.1469
BLS18	Ol	Nuomin	Tian et al. (2020)	41.0467	0	0.00666667	0.0333333	8.75167	0.12	49.6133	0.0766667			0.393333	100.042	90.9953
BLS19	Ol	Nuomin	Tian et al. (2020)	40.835	0.0425	0.04	0.024	9.325	0.12	49.1517	0.0866667	0.0225	0.012	0.431667	100.091	90.3807
BLS20	Ol	Nuomin	Tian et al. (2020)	41.0683	0	0.0183333	0.0116667	8.85667	0.125	49.8117	0.0683333			0.385	100.345	90.9301
BLS21	Ol	Nuomin	Tian et al. (2020)	40.7837	0.078	0.0483333	0.0366667	10.0425	0.15	48.0125	0.095	0.022	0.01	0.42625	99.705	89.4983
BLS24	Ol	Nuomin	Tian et al. (2020)	41.1183	0.00333333	0.0133333	0.0266667	8.42	0.125	49.8433	0.0733333			0.395	100.018	91.3435
BLS25	Ol	Nuomin	Tian et al. (2020)	40.9333	0.00333333	0.00333333	0.03	9.18	0.118333	49.2783	0.065			0.381667	99.9933	90.5382
BLS27	Ol	Nuomin	Tian et al. (2020)	41.544	0.0325	0.03	0.05	10.55	0.11	47.73	0.07	0.015	0.01	0.486	100.627	88.968
BLS29	Ol	Nuomin	Tian et al. (2020)	41.5186	0.05	0.025	0.054	9.60429	0.165714	48.7843	0.0785714	0.014	0.01	0.455714	100.76	90.0541
BLS30	Ol	Nuomin	Tian et al. (2020)	41.3433	0.095	0.0266667	0.0633333	9.91	0.13	48.28	0.08	0.0266667	0.01	0.396667	100.362	89.674
BLS31	Ol	Nuomin	Tian et al. (2020)	40.8633	0.1	0.01	0.01	11.95	0.09	46.7233	0.0666667	0.0133333	0.01	0.42	100.257	87.4523
BLS33	Ol	Nuomin	Tian et al. (2020)	40.86	0.00833333	0.00666667	0.0116667	10.3083	0.123333	48.3967	0.0783333			0.395	100.188	89.3264
BLS34	Ol	Nuomin	Tian et al. (2020)	41.316	0.0466667	0.026	0.0625	8.334	0.138	49.872	0.088	0.024	0.015	0.378	100.3	91.4289
BLS35A	Ol	Nuomin	Tian et al. (2020)	42.0817	0.01	0.015	0.04	9.07167	0.141667	48.5933	0.0733333	0.0166667	0.01	0.415	100.468	90.5199
BLS38A	Ol	Nuomin	Tian et al. (2020)	41.0443	0.0266667	0.0185714	0.03	9.27571	0.13	48.4271	0.0842857	0.0228571	0.0283333	0.47	99.5579	90.2973
BLS39A	Ol	Nuomin	Tian et al. (2020)	41.23	0	0.00833333	0	8.065	0.113333	50.2717	0.0133333			0.391667	100.093	91.7432
BLS40	Ol	Nuomin	Tian et al. (2020)	40.7471	0.0533333	0.05	0.092	10.64	0.138571	47.8571	0.07	0.04	0.0233333	0.387143	100.099	88.9106
NMH01	Ol	Nuomin	Tian et al. (2020)	41.086	0.034	0.0325	0.045	10.386	0.158	48.55	0.07	0.036	0.01	0.392	100.799	89.2849
NMH03	Ol	Nuomin	Tian et al. (2020)	40.82	0.05	0.0433333	0.045	10.0067	0.15	48.5033	0.0633333	0.0166667	0.01	0.413333	100.122	89.6268
NMH04	Ol	Nuomin	Tian et al. (2020)	41.08	0.025	0.025	0.045	9.6675	0.145	48.7275	0.0725	0.025	0.01	0.3925	100.215	89.9847
NMH06	Ol	Nuomin	Tian et al. (2020)	41.4775	0.025	0.02	0.07	9.99	0.1325	48.61	0.0875	0.02	0.01	0.4475	100.89	89.6627
NMH09	Ol	Nuomin	Tian et al. (2020)	41.2783	0.03	0.0233333	0.068	10.2567	0.126667	47.9317	0.0766667	0.026	0.008	0.473333	100.299	89.2822
XSFS01	Ol	Nuomin	Tian et al. (2020)	41.2733	0	0.00666667	0.0233333	8.24	0.121667	50.3567	0.0433333			0.386667	100.452	91.5921
XSFS06	Ol	Nuomin	Tian et al. (2020)	41.2133	0	0.02	0.00333333	8.15833	0.116667	50.5667	0.0133333			0.376667	100.468	91.7002
XSFS07	Ol	Nuomin	Tian et al. (2020)	41.7375	0.0675	0.01	0.0433333	8.8425	0.1475	49.62	0.0225	0.02	0.01	0.445	100.966	90.9115
CH01-01	Ol	Halaha	Zhang (2011)	41.04	0.04	0.05	0.07	9.46	0.15	49.18	0.17	0.01	0.01	0.37	100.55	90.2601
CH01-02	Ol	Halaha	Zhang (2011)	40.43	0.03	0.04	0.06	12.58	0.18	47.24	0.11	0.01	0.01	0.4	101.09	87.0025
CH01-04	Ol	Halaha	Zhang (2011)	40.7	0.04	0.02	0.12	8.99	0.12	49.64	0.1	0.02	0.01	0.4	100.16	90.7772
CH01-05	Ol	Halaha	Zhang (2011)	40.38	0.02	0.01	0.02	10.5	0.1	48.24	0.16	0.01	0.02	0.42	99.88	89.1181
CH01-07	Ol	Halaha	Zhang (2011)	40.33	0	0	0.03	10.14	0.11	48.83	0.08	0.01	0	0.41	99.94	89.566
CH01-08	Ol	Halaha	Zhang (2011)	40.81	0.01	0.04	0.06	9.65	0.11	49.2	0.18	0.01	0	0.41	100.48	90.0875
CH01-09	Ol	Halaha	Zhang (2011)	41.09	0.02	0	0.01	10.1	0.13	48.93	0.03	0.01	0	0.41	100.73	89.6219
CH01-10	Ol	Halaha	Zhang (2011)	41.08	0.01	0.05	0.08	9.67	0.07	49.08	0.17	0.02	0.01	0.39	100.63	90.0471
CH01-11	Ol	Halaha	Zhang (2011)	41.19	0.02	0.04	0.08	9.73	0.13	49.35	0.11	0.02	0.01	0.39	101.07	90.0408
CH02-01	Ol	Halaha	Zhang (2011)	40.8	0.04	0.04	0.1	9.18	0.13	49.2	0.1	0.02	0.01	0.39	100.01	90.5245
CH02-04	Ol	Halaha	Zhang (2011)	40.89	0.03	0.06	0.08	8.93	0.1	49.27	0.18	0.02	0.01	0.41	99.98	90.7706
CH02-05	Ol	Halaha	Zhang (2011)	40.88	0.02	0.04	0.06	9.03	0.16	48.81	0.13	0.02	0	0.35	99.5	90.5973
03CH-01	Ol	Halaha	Zhang (2011)	41.03	0.03	0.06	0.07	9.14	0.15	48.65	0.16	0.03	0.01	0.38	99.71	90.4654
03CH-02	Ol	Halaha	Zhang (2011)	41.15	0.06	0.09	0.04	9.94	0.14	48.72	0.2	0.03	0	0.42	100.79	89.7299
03CH-03	Ol	Halaha	Zhang (2011)	41.43	0.04	0.06	0.02	9.73	0.15	48.69	0.14	0.03	0.01	0.39	100.69	89.9194
03CH-04	Ol	Halaha	Zhang (2011)	40.84	0.04	0.21	0.12	8.85	0.16	48.59	0.16	0.04	0.01	0.44	99.46	90.7295
03CH-05	Ol	Halaha	Zhang (2011)	41.2	0.02	0.02	0	8.93	0.14	49.04	0.02	0.02	0.01	0.42	99.82	90.7314
03CH-06	Ol	Halaha	Zhang (2011)	40.33	0	0.09	0.1	9.68	0.14	47.97	0.15	0.02	0.01	0.41	98.9	89.8308
03CH-07	Ol	Halaha	Zhang (2011)	40.89	0.05	0.04	0.06	8.93	0.15	49.23	0.12	0.05	0.01	0.38	99.91	90.7638
03CH-08	Ol	Halaha	Zhang (2011)	41	0.02	0.09	0.07	8.87	0.16	49.01	0.14	0.03	0	0.36	99.75	90.7828
03CH-10	Ol	Halaha	Zhang (2011)	41.46	0.04	0.02	0.03	7.69	0.13	50.11	0.07	0.02	0.02	0.42	100.01	92.0733
03CH-13	Ol	Halaha	Zhang (2011)	40.62	0.03	0	0.06	8.5	0.12	49.21	0.14	0.02	0.01	0.42	99.13	91.166
03CH-15	Ol	Halaha	Zhang (2011)	41.12	0.05	0.07	0.1	9.82	0.15	48.48	0.2	0.02	0.01	0.38	100.4	89.7961
GW04226	Ol	Halaha	Zhang (2011)	40.88	0.02	0.01	0.02	10.18	0.16	47.74	0.01	0.01	0.01	0.38	99.42	89.3156
GW04227	Ol	Halaha	Zhang (2011)	40.92	0.03	0.05	0.03	9.69	0.15	48.9	0.17	0.03	0.01	0.4	100.38	89.9955
GW04229	Ol	Halaha	Zhang (2011)	40.67	0.01	0.05	0.05	9.75	0.16	47.88	0.16	0.02	0.02	0.37	99.14	89.7475
GW04240	Ol	Halaha	Zhang (2011)	41.03	0.04	0.03	0.07	9.04	0.13	49.13	0.18	0.03	0.01	0.37	100.06	90.6435
07DLH04	Ol	Halaha	Zhao & Fan (2011)	40.79	0	0	0.05	7.72	0.12	49.4	0.1	0.01	0.01	0.37	98.56	91.9397
07DLH05	Ol	Halaha	Zhao & Fan (2011)	41.4	0	0.01	0.09	8.5	0.09	49.16	0.11	0.03	0	0.5	99.9	91.1578
07HXD01	Ol	Halaha	Zhao & Fan (2011)	40.17	0	0.03	0.12	8.6	0.12	49.21	0.17	0	0.01	0.4	98.81	91.0714
07HXD03	Ol	Halaha	Zhao & Fan (2011)	40.59	0	0.05	0.08	9.11	0.1	49.05	0.11	0.02	0	0.37	99.49	90.5639
07HXD05	Ol	Halaha	Zhao & Fan (2011)	41.72	0	0.02	0.07	8.25	0.14	49.64	0.08	0	0	0.34	99.82	91.4716
07TFL01	Ol	Halaha	Zhao & Fan (2011)	40.35	0.02	0	0	8.1	0.14	49.65	0.02	0	0.01	0.29	98.56	91.6152
07TFL03	Ol	Halaha	Zhao & Fan (2011)	41.12	0	0.02	0.04	7.93	0.12	50.76	0.02	0	0	0.39	100.39	91.9421
08TFL02	Ol	Halaha	Zhao & Fan (2011)	40.48	0	0	0.02	8.66	0.08	49.91	0.02	0	0	0.34	99.52	91.1295
08TFL07	Ol	Halaha	Zhao & Fan (2011)	41.15	0.02	0	0.02	8.44	0.1	49.98	0.03	0	0	0.39	100.13	91.3464
07WNP01	Ol	Halaha	Zhao & Fan (2011)	41.13	0	0.04	0.04	9.33	0.1	48.61	0.1	0.01	0.01	0.34	99.72	90.2792
07WNP07	Ol	Halaha	Zhao & Fan (2011)	40.47	0	0.04	0.13	9.85	0.2	49.39	0.12	0	0	0.38	100.58	89.9377
07TFL04	Ol	Halaha	Zhao & Fan (2011)	40.82	0	0	0	9.94	0.16	48.91	0	0.01	0	0.42	100.25	89.7657
07TFL06	Ol	Halaha	Zhao & Fan (2011)	40.1	0	0	0.05	9.52	0.16	48.34	0.01	0	0.01	0.36	98.54	90.0511
07DCH01	Ol	Halaha	Zhao & Fan (2011)	41.76	0	0	0	9.51	0.16	49.44	0.03	0	0	0.37	101.28	90.2601
07DCH02	Ol	Halaha	Zhao & Fan (2011)	40.92	0.03	0	0	9.63	0.16	49.4	0.02	0	0.01	0.35	100.51	90.1421
08WNP08	Ol	Halaha	Zhao & Fan (2011)	40.54	0	0.07	0.05	9.49	0.11	48.16	0.17	0	0	0.4	98.99	90.0459
08TFL06	Ol	Halaha	Zhao & Fan (2011)	40.58	0.02	0.12	0.09	10.2	0.12	47.89	0.04	0.02	0.01	0.34	99.43	89.3268
TFL-04	Ol	Halaha	Liu (2014)	40.98				8.82	0.18	50.64					100.62	91.0989
TFL-07	Ol	Halaha	Liu (2014)	40.84		0.02		7.84	0.09	51.2					99.99	92.0893
0098-10-1	Ol	Halaha	Liu (2014)	42.27	0.05	1.07	0.2	8.34	0.25	47.38	1.12				100.68	91.0127
0098-10	Ol	Halaha	Liu (2014)	41.47				8.66	0.12	50.99	0.02				101.26	91.3011
0098-13	Ol	Halaha	Liu (2014)	40.91		0.05	0.05	8.38	0.11	50.2	0.15				99.85	91.4371
0098-19	Ol	Halaha	Liu (2014)	41.08				8.61	0.09	51.03					100.81	91.3531
TXT-04	Ol	Halaha	Liu (2014)	40.99		0.02		8.81	0.16	50.04	0.08				100.1	91.011
TFL-08	Ol	Halaha	Liu (2014)	40.85				9.52	0.12	50.18	0.02				100.69	90.3808
0098-06	Ol	Halaha	Liu (2014)	40.82	0.05			10.16	0.13	48.35					99.51	89.4547
0098-15	Ol	Halaha	Liu (2014)	40.72		0.03	0.06	10.72	0.12	48.9					100.55	89.0486
0098-17	Ol	Halaha	Liu (2014)	40.63	0.07			10.63	0.16	49.02					100.51	89.1542
TXT-02	Ol	Halaha	Liu (2014)	40.68				8.91	0.1	49.52	0.13				99.34	90.8316
AS01	Ol	Halaha	Pan et al. (2015)	40.7866	0.0154	0.0174	0.0064	10.2592	0.123	48.0382	0.0266	0.0021	6.9e-05	0.3858	99.6586	89.3011
AS02	Ol	Halaha	Pan et al. (2015)	41.1636	0.0054	0.0236	0.0088	8.7286	0.0968	48.8504	0.0226	0.00512	0.000351	0.3984	99.2982	90.8894
AS03	Ol	Halaha	Pan et al. (2015)	40.8382	0.0294	0.032	0.0188	9.2894	0.1082	48.335	0.078	0.0142	3.52e-05	0.396	99.125	90.2677
AS04	Ol	Halaha	Pan et al. (2015)	40.7998	0.131	0.0444	0.032	9.3056	0.103	48.5894	0.1136	0.0158	1.2e-05	0.4092	99.5282	90.2985
AS05	Ol	Halaha	Pan et al. (2015)	40.9154	0.0184	0.0456	0.0386	9.3198	0.116	48.7906	0.1086	0.015141	2.5e-05	0.3658	99.7192	90.3213
AS07	Ol	Halaha	Pan et al. (2015)	40.9658	0.0216	0.0634	0.046	8.8316	0.0924	48.814	0.1896	0.009146	3.13e-05	0.3944	99.4186	90.7856
DHG01	Ol	Halaha	Pan et al. (2015)	40.8312	0.0122	0.0288	0.0236	11.257	0.1074	46.6488	0.0644	0.0131	9.1e-05	0.4068	99.3806	88.0766
DHG02	Ol	Halaha	Pan et al. (2015)	40.4105	0.0425	0.0345	0.0195	10.709	0.10275	47.292	0.07775	0.0106	1.6e-05	0.3505	99.0392	88.7285
DHG04	Ol	Halaha	Pan et al. (2015)	40.9626	0.018	0.0672	0.0552	9.5418	0.1128	48.3234	0.1308	0.01988	3.03e-05	0.3702	99.5814	90.0275
DHG09	Ol	Halaha	Pan et al. (2015)	41.1582	0.0152	0.0168	0.0074	8.9176	0.1238	49.0066	0.0412	0.003617	0.00011	0.3766	99.6634	90.7373
DHG11	Ol	Halaha	Pan et al. (2015)	41.0705	0.01075	0.0665	0.10125	8.4665	0.10125	48.804	0.12375	0.006682	0.000115	0.3665	99.1115	91.131
DHG12	Ol	Halaha	Pan et al. (2015)	41.052	0.0034	0.0686	0.0462	8.7974	0.137	48.7468	0.1592	0.01467	1.61e-05	0.349	99.3598	90.8065
DHG13	Ol	Halaha	Pan et al. (2015)	40.9278	0.0115	0.07875	0.06525	8.86975	0.12125	49.1142	0.1515	0.01576	9.496e-05	0.3655	99.7052	90.8008
DHG05	Ol	Halaha	Pan et al. (2015)	41.1525	0.013	0.057	0.04525	8.6095	0.11225	48.7033	0.14625	0.0007513	5.65e-05	0.3835	99.223	90.9778
DHG14	Ol	Halaha	Pan et al. (2015)	40.8918	0.0085	0.082	0.07375	8.77025	0.1265	48.8475	0.1955	0.01988	3.03e-05	0.3425	99.3383	90.8494
A2-2	Ol	Abaga	Zhang et al. (2012)	41.2	0.007	0.001	0.03	9.78	0.12	48.9	0.02			0.42	100.48	89.912
A2-1	Ol	Abaga	Zhang et al. (2012)	41.2	0.005	0.02	0.03	9.92	0.13	49	0.07			0.38	100.76	89.8011
A2-10	Ol	Abaga	Zhang et al. (2012)	41.3	0.02	0.003	0.03	9.98	0.11	49.2	0.04			0.41	101.09	89.7831
A2-11	Ol	Abaga	Zhang et al. (2012)	42.5	0.02	0.32	0.04	9.79	0.14	47.6	0.06			0.38	100.85	89.6555
ABG08	Ol	Abaga	Zhang et al. (2012)	40.7	0.02	0.01	0.01	10	0.14	48.4	0.02			0.39	99.69	89.6131
ABG05-1	Ol	Abaga	Zhang et al. (2012)	41.6	0.03	0.004	0.02	9.37	0.12	49.4	0.03			0.42	100.99	90.3827
ABG06-1	Ol	Abaga	Zhang et al. (2012)	40.8	0.01	0.01	0.01	9.31	0.11	48.5	0.02			0.38	99.15	90.2782
ABG07-1	Ol	Abaga	Zhang et al. (2012)	41.2	0.01	0.03	0.03	9.81	0.12	49	0.11			0.39	100.7	89.9027
XLHT1	Ol	Abaga	Pan et al. (2013)	40.9	0.01	0.06	0.04	9.36	0.13	48.9	0.11	0.02	0.01		99.54	90.3032
XLHT2a	Ol	Abaga	Pan et al. (2013)	41.2	0.01	0.01	0.02	9.15	0.14	49.3	0.08	0.01	0.01		99.93	90.5699
XLHT2b	Ol	Abaga	Pan et al. (2013)	40.4	0.01	0.01	0.03	8.49	0.13	48.5	0.07	0.02	0.01		97.67	91.0579
XLHT3	Ol	Abaga	Pan et al. (2013)	40.7	0.01	0.04	0.02	10.77	0.17	47.9	0.06	0.03	0		99.7	88.7992
XLHT4	Ol	Abaga	Pan et al. (2013)	40.8	0.01	0.02	0.02	11.18	0.14	47.7	0.09	0.01	0.01		99.98	88.3793
XLHT9	Ol	Abaga	Pan et al. (2013)	41.1	0.02	0.01	0.02	9.57	0.12	49.1	0.06	0.02	0.01		100.03	90.1435
XLHT10	Ol	Abaga	Pan et al. (2013)	41.2	0	0.03	0.03	8.78	0.12	49.3	0.08	0.01	0.01		99.56	90.9166
XLHT11	Ol	Abaga	Pan et al. (2013)	41.2	0.01	0.01	0.03	8.85	0.11	49.6	0.08	0.01	0		99.9	90.9011
XLHT12	Ol	Abaga	Pan et al. (2013)	40.8	0.01	0.07	0.04	10.99	0.14	47.8	0.08	0.03	0		99.96	88.5754
XLHT13	Ol	Abaga	Pan et al. (2013)	40.9	0.01	0	0.04	9.01	0.13	48.8	0.06	0.03	0.01		98.99	90.6144
XLHT14	Ol	Abaga	Pan et al. (2013)	41.3	0.02	0.01	0.02	9.41	0.13	49.1	0.02	0.01	0		100.02	90.2923
XLHT15	Ol	Abaga	Pan et al. (2013)	41.3	0.01	0.05	0.05	9.22	0.14	49.3	0.1	0.01	0		100.18	90.5046
XLHT17	Ol	Abaga	Pan et al. (2013)	41.1	0.01	0	0.01	9.72	0.15	48.9	0.01	0.01	0.01		99.92	89.9677
XLHT18	Ol	Abaga	Pan et al. (2013)	41	0.01	0	0.01	9.76	0.14	48.7	0.03	0.05	0.03		99.73	89.8934
XLHT19	Ol	Abaga	Pan et al. (2013)	41.4	0.02	0.01	0.02	9.01	0.12	49.4	0.03	0.01	0		100.02	90.7179
XLHT20	Ol	Abaga	Pan et al. (2013)	41.2	0.01	0	0.01	9.73	0.14	48.7	0.03	0.02	0		99.84	89.9213
XLHT22	Ol	Abaga	Pan et al. (2013)	41.2	0.01	0	0.04	9.22	0.13	49	0.11	0.01	0		99.72	90.452
southeastern NEC
BLS-1	Ol	Shuangliao	Yu et al. (2009)	41.06	0.02	0.01	0.01	10.64	0.14	49.15	0.05	0.01		0.13	101.22	89.1708
BLS-2	Ol	Shuangliao	Yu et al. (2009)	41.04	0.02	0.03	0.04	8.71	0.1	49.98	0.04	0.01		0.14	100.11	91.0942
BLS-3	Ol	Shuangliao	Yu et al. (2009)	40.9	0.03	0.01	0.05	9.85	0.14	49.35	0.05	0.03		0.13	100.54	89.9304
BLS-5	Ol	Shuangliao	Yu et al. (2009)	40.95	0.03	0.03	0	10.4	0.14	49.18	0.07	0.02		0.14	100.96	89.3949
BLS-6	Ol	Shuangliao	Yu et al. (2009)	40.87	0.01	0.02	0.02	9.01	0.12	49.54	0.06	0		0.14	99.79	90.7417
NBS-1	Ol	Shuangliao	Yu et al. (2009)	40.85	0.02	0.02	0.05	9.85	0.16	49.48	0.03	0.01		0.14	100.61	89.9542
BBT-1	Ol	Shuangliao	Yu et al. (2009)	41.18	0.03	0.04	0.02	9.64	0.13	49.72	0.09	0.01		0.13	100.99	90.1901
BBT-2	Ol	Shuangliao	Yu et al. (2009)	40.93	0.02	0.01	0.01	8.67	0.12	49.49	0.03	0.01		0.18	99.47	91.0516
BBT-4	Ol	Shuangliao	Yu et al. (2009)	41.25	0.03	0.01	0.02	8.87	0.13	49.76	0.03	0.02		0.14	100.26	90.9091
BBT-5	Ol	Shuangliao	Yu et al. (2009)	41.07	0.03	0.02	0.04	8.71	0.12	49.78	0.02	0.01		0.14	99.94	91.0617
BBT-6	Ol	Shuangliao	Yu et al. (2009)	40.85	0.03	0.02	0.02	8.9	0.11	49.45	0.11	0.01		0.14	99.64	90.8292
BBT-7	Ol	Shuangliao	Yu et al. (2009)	41.02	0.01	0.02	0.03	9.22	0.14	49.08	0.09	0.02		0.12	99.75	90.4661
BBT-8	Ol	Shuangliao	Yu et al. (2009)	41.02	0.05	0.03	0.04	9.96	0.14	48.91	0.1	0.02		0.12	100.39	89.7472
BBT-9	Ol	Shuangliao	Yu et al. (2009)	41.36	0.02	0.02	0.05	8.64	0.11	49.94	0.1	0.02		0.14	100.4	91.153
BBT-10	Ol	Shuangliao	Yu et al. (2009)	41.02	0.03	0.01	0.04	8.35	0.15	50.16	0.09	0.01		0.13	99.99	91.4589
BBT-11	Ol	Shuangliao	Yu et al. (2009)	41.29	0.04	0.03	0.03	9.52	0.12	49.62	0.11	0.01		0.15	100.92	90.2828
BBT1-5	Ol	Shuangliao	Hao et al. (2016)	40.86	0	0.02	0.05	8.47	0.11	50.2	0.17	0.03	0	0.17	100.08	91.3531
BBT1-06	Ol	Shuangliao	Hao et al. (2016)	40.8	0	0.01	0.03	8.33	0.11	50.9	0.08	0.03	0.01	0.17	100.47	91.5911
BBT2-4	Ol	Shuangliao	Hao et al. (2016)	40.25	0.01	0.03	0.05	7.51	0.13	50.76	0.08	0.01	0	0.15	98.98	92.3361
BBT2-14	Ol	Shuangliao	Hao et al. (2016)	40.36	0.02	0.01	0.02	9.43	0.16	50.11	0.09	0.01	0.01	0.15	100.37	90.451
BL2-10	Ol	Shuangliao	Hao et al. (2016)	39.88	0	0.01	0.01	9.7	0.15	49.53	0.06	0.02	0.01	0.16	99.53	90.101
17SL1-1	Ol	Shuangliao	Guo et al. (2020)	40.95	0.02	0.01	0.02	9.41	0.13	49.18	0.07	0.04	0	0.33	100.16	90.3066
17SL1-2	Ol	Shuangliao	Guo et al. (2020)	40.55	0.03	0.04	0.03	9.59	0.14	48.88	0.08	0.06	0.02	0.32	99.74	90.0849
17SL1-7	Ol	Shuangliao	Guo et al. (2020)	41.21		0.02	0.05	8.83	0.12	49.54	0.07	0.05	0.01	0.35	100.25	90.9098
17SL1-8	Ol	Shuangliao	Guo et al. (2020)	41.08	0.03	0.03	0.01	8.65	0.15	49.75	0.08	0.01	0.02	0.38	100.19	91.1129
17SL1-16	Ol	Shuangliao	Guo et al. (2020)	40.47	0.01	0.01	0.04	9.89	0.16	48.58	0.04	0.01	0.01	0.31	99.53	89.7499
17SL1-18	Ol	Shuangliao	Guo et al. (2020)	40.98	0.02	0.01	0.04	9.74	0.12	48.86	0.02	0.05	0.02	0.39	100.25	89.9417
17SL1-20	Ol	Shuangliao	Guo et al. (2020)	40.77	0.02	0.02	0.05	9.72	0.13	48.45	0.07	0.04	0.01	0.31	99.59	89.8839
17SL1-23	Ol	Shuangliao	Guo et al. (2020)	40.87	0.01	0.01	0.03	9.03	0.16	49.33	0.05	0.02	0.01	0.4	99.92	90.6872
17SL2-3	Ol	Shuangliao	Guo et al. (2020)	40.82		0.01		9.76	0.13	48.83	0.04	0.03	0.02	0.29	99.93	89.9176
17SL2-6	Ol	Shuangliao	Guo et al. (2020)	40.45	0.03	0.01	0.01	10.06	0.14	48.21	0.04	0.07	0.02	0.31	99.35	89.5205
17SL2-7	Ol	Shuangliao	Guo et al. (2020)	40.76		0.02	0.03	10.09	0.18	48.49	0.04	0.01	0	0.3	99.92	89.5469
17SL3-15	Ol	Shuangliao	Guo et al. (2020)	40.8	0	0.03	0.03	8.16	0.12	50.09	0.09	0.01	0	0.35	99.68	91.6263
17SL3-16	Ol	Shuangliao	Guo et al. (2020)	41.38	0.02	0.02	0.03	8.37	0.11	50.55	0.11	0.03	0.01	0.35	100.98	91.5006
l-14	Ol	Yitong	Xu et al. (1993)	40.9				10.22	0.1	47.8	0.03			0.38	99.43	89.2901
l-44	Ol	Yitong	Xu et al. (1993)	40.01				9.92	0.12	49.48	0.06			0.35	99.94	89.89
2-07	Ol	Yitong	Xu et al. (1993)	40.64				10.26	0.15	48.57	0.07			0.32	100.01	89.405
2-32	Ol	Yitong	Xu et al. (1993)	40.62				9.24	0.13	49.53	0.08			0.41	100.01	90.526
3-07	Ol	Yitong	Xu et al. (1993)	41.31				9.11	0.14	49.98	0.06			0.39	100.99	90.7232
3-17	Ol	Yitong	Xu et al. (1993)	40.2				11.83	0.13	47.55	0.05			0.31	100.07	87.7524
l-48	Ol	Yitong	Xu et al. (1993)	38.78				19.01	0.22	41.63	0.05			0.24	99.93	79.6069
l-17	Ol	Yitong	Xu et al. (1993)	38.72				19.17	0.22	41.03	0.08			0.25	99.47	79.2326
2-12	Ol	Yitong	Xu et al. (1993)	41				9.66	0.11	49.19	0.04			0.35	100.35	90.0764
2-31	Ol	Yitong	Xu et al. (1993)	40.17				10.74	0.1	48.79	0.1			0.45	100.35	89.0084
2-51	Ol	Yitong	Xu et al. (1993)	40.73				10.27	0.06	49.38	0.02			0.37	100.83	89.5516
DX91-7	Ol	Yitong	Xu et al. (1993)	40.47				10.03	0.11	49	0.03			0.36	100	89.6996
DX-06	Ol	Yitong	Zhou et al. (2010)	42.18	0	0.01	0.03	9.37	0.14	48.96	0.05	0.01	0.02	0.37	101.14	90.3046
DX-07	Ol	Yitong	Zhou et al. (2010)	42.17	0.01	0	0.03	8.8	0.14	49.53	0.07	0.03	0.01	0.36	101.15	90.9362
DX-08	Ol	Yitong	Zhou et al. (2010)	42.19	0	0.02	0.03	9.78	0.15	48.83	0.06	0.04	0.02	0.35	101.47	89.899
DX-10	Ol	Yitong	Zhou et al. (2010)	41.94	0.01	0.01	0.03	9.28	0.14	49.24	0.04	0.02	0.01	0.38	101.1	90.4382
DX-11	Ol	Yitong	Zhou et al. (2010)	42.43	0.01	0	0.02	9.03	0.17	49.71	0.05	0	0	0.32	101.74	90.7518
08DX-01	Ol	Yitong	Zhou et al. (2010)	40.66	0.01	0.02	0	10.06	0.12	47.83	0.05	0.01	0.01	0.35	99.12	89.446
08DX-02	Ol	Yitong	Zhou et al. (2010)	40.76	0.03	0.02	0	9.72	0.16	47.74	0.07	0	0.01	0.35	98.86	89.7489
08DX-04	Ol	Yitong	Zhou et al. (2010)	40.74	0.02	0.03	0	10.12	0.15	47.66	0.09	0.01	0	0.42	99.24	89.3559
08DX-06	Ol	Yitong	Zhou et al. (2010)	40.67	0.02	0.02	0	10.28	0.15	47.54	0.04	0.01	0.01	0.39	99.13	89.1815
08DX-08	Ol	Yitong	Zhou et al. (2010)	41.31	0.01	0.01	0	10.15	0.15	48.23	0.07	0	0.01	0.38	100.32	89.4406
08DX-10	Ol	Yitong	Zhou et al. (2010)	41.03	0.01	0.01	0	11.55	0.17	47.42	0.09	0.01	0	0.35	100.64	87.9786
08DX-11	Ol	Yitong	Zhou et al. (2010)	40.59	0	0.01	0.02	9.98	0.17	48.16	0.07	0.01	0.01	0.39	99.41	89.5855
08DX-12	Ol	Yitong	Zhou et al. (2010)	40.45	0	0.02	0.02	10.61	0.13	47.83	0.05	0.01	0.01	0.36	99.49	88.9329
08DX-13	Ol	Yitong	Zhou et al. (2010)	40.25	0.01	0.01	0.01	10.71	0.13	47.51	0.04	0.01	0.01	0.41	99.1	88.7735
08DX-14	Ol	Yitong	Zhou et al. (2010)	40.2	0	0.01	0	11.55	0.16	46.97	0.06	0.02	0.01	0.36	99.34	87.8774
08DX-15	Ol	Yitong	Zhou et al. (2010)	40.5	0	0.02	0	10.27	0.15	47.87	0.1	0.01	0	0.39	99.31	89.2574
DX-03	Ol	Yitong	Zhou et al. (2010)	41.25	0	0.01	0.03	11.13	0.16	48.11	0.06	0.01	0	0.31	101.07	88.5126
DX-09	Ol	Yitong	Zhou et al. (2010)	42.19	0	0.02	0.03	9.78	0.15	48.83	0.06	0.04	0.02	0.35	101.47	89.899
08DX-05	Ol	Yitong	Zhou et al. (2010)	40.89	0.02	0.02	0	10.12	0.12	47.97	0.07	0.02	0.01	0.4	99.64	89.4174
08DX-07	Ol	Yitong	Zhou et al. (2010)	41	0.03	0.01	0	10.4	0.13	48.16	0.07	0.01	0.01	0.36	100.18	89.1946
08DX-17	Ol	Yitong	Zhou et al. (2010)	41.07	0.01	0.02	0	9.96	0.14	48.56	0.09	0.01	0	0.36	100.22	89.681
08DX-18	Ol	Yitong	Zhou et al. (2010)	40.59	0.01	0.01	0.04	10.2	0.13	48.35	0.08	0.01	0	0.39	99.81	89.4176
DX-04	Ol	Yitong	Zhou et al. (2010)	41.56	0.01	0	0.01	9.91	0.15	48.85	0.02	0	0	0.4	100.91	89.7822
DX-05	Ol	Yitong	Zhou et al. (2010)	41.7	0	0.01	0.02	10.14	0.14	48.23	0.04	0.03	0.01	0.31	100.63	89.4499
08DX-03	Ol	Yitong	Zhou et al. (2010)	40.16	0.02	0.03	0	14.9	0.17	45.18	0.09	0.02	0.01	0.27	100.85	84.3874
08DX-09	Ol	Yitong	Zhou et al. (2010)	40.79	0.04	0.02	0.03	9.77	0.1	47.95	0.06	0.01	0.01	0.35	99.13	89.7421
DX-01	Ol	Yitong	Zhou et al. (2010)	40.45	0.02	0.01	0.02	9.88	0.15	48.11	0.06	0.01	0	0.35	99.06	89.6694
DX-02	Ol	Yitong	Zhou et al. (2010)	41.75	0	0	0.02	7.99	0.12	50.13	0.07	0	0	0.39	100.47	91.7924
08DX-20	Ol	Yitong	Zhou et al. (2010)	41.42	0.02	0.02	0	8.8	0.13	49.26	0.1	0.03	0	0.34	100.12	90.8911
08DX-16	Ol	Yitong	Zhou et al. (2010)	40.16	0.01	0.01	0.01	11.91	0.15	47.11	0.06	0.01	0.03	0.34	99.8	87.579
08DX-19	Ol	Yitong	Zhou et al. (2010)	40.73	0.01	0.01	0.03	11.18	0.12	47.53	0.05	0.03	0.01	0.37	100.07	88.3426
YT-5	Ol	Yitong	Hao et al. (2016)	40.46	0	0.03	0.03	8.92	0.11	50.54	0.06	0.01	0.01	0.14	100.31	90.9908
YT-25	Ol	Yitong	Hao et al. (2016)	40.4	0.01	0.01	0.03	9.63	0.14	49.76	0.08	0.05	0	0.15	100.26	90.2064
YT-26	Ol	Yitong	Hao et al. (2016)	40.18	0	0	0.02	9.29	0.13	50.67	0.05	0.04	0.01	0.13	100.52	90.6738
DSH00-2	Ol	Jiaohe	Zhou et al. (2007)	41.37	0.03	0.01	0.03	9.84	0.12	48.24	0.06	0.02	0.01	0.4	100.13	89.7319
DSH00-3	Ol	Jiaohe	Zhou et al. (2007)	41.3	0.02	0	0.02	10.3	0.06	48.17	0.07	0.01	0.02	0.35	100.32	89.2893
DSH00-4	Ol	Jiaohe	Zhou et al. (2007)	40.72	0	0	0	9.52	0.18	48.79	0.05	0	0.01	0.43	99.7	90.1338
DSH00-5	Ol	Jiaohe	Zhou et al. (2007)	41.59	0	0.01	0.01	9.48	0.11	48.56	0.04	0.09	0.02	0.4	100.31	90.1292
DSH00-6	Ol	Jiaohe	Zhou et al. (2007)	41.7	0	0	0.01	10.17	0.2	48.51	0.04	0.01	0.02	0.4	101.06	89.4766
DSH00-7	Ol	Jiaohe	Zhou et al. (2007)	41.84	0.01	0.02	0	10.54	0.2	48.63	0.06	0	0.01	0.39	101.7	89.1592
DSH00-8	Ol	Jiaohe	Zhou et al. (2007)	41.25	0.03	0	0.01	9.73	0.19	49.44	0.06	0.02	0.02	0.39	101.14	90.0572
DSH00-10	Ol	Jiaohe	Zhou et al. (2007)	41.53	0	0	0	8.43	0.16	49.94	0.05	0.01	0	0.39	100.51	91.3495
DSH00-11	Ol	Jiaohe	Zhou et al. (2007)	40.06	0.05	0.1	0.01	9.45	0.17	48.8	0.04	0.01	0	0.38	99.07	90.201
DSH00-12	Ol	Jiaohe	Zhou et al. (2007)	41.91	0	0.01	0.01	9.65	0.18	48.82	0.08	0.03	0.03	0.38	101.1	90.018
YQS-1	Ol	Jiaohe	Yu et al. (2009)	41.16	0	0.01	0.02	9.57	0.13	49.61	0.01	0		0.15	100.66	90.2349
YQS-2	Ol	Jiaohe	Yu et al. (2009)	41.28	0.01	0	0	8.34	0.12	50.36	0.01	0.02		0.14	100.28	91.4993
YQS-3	Ol	Jiaohe	Yu et al. (2009)	41.09	0.04	0	0.02	9.82	0.12	49.53	0.02	0.01		0.15	100.8	89.9908
YQS-4	Ol	Jiaohe	Yu et al. (2009)	41.01	0.02	0.01	0.05	8.9	0.12	49.86	0.02	0.01		0.15	100.15	90.8978
YQS-5	Ol	Jiaohe	Yu et al. (2009)	41.15	0.01	0.01	0	9.45	0.12	49.45	0.03	0.02		0.13	100.37	90.3173
YQS-6	Ol	Jiaohe	Yu et al. (2009)	41.2	0.01	0	0.05	8.79	0.13	49.92	0.01	0.02		0.14	100.27	91.01
YQS-7	Ol	Jiaohe	Yu et al. (2009)	41.27	0.02	0	0.03	10.43	0.14	49.06	0.02	0.01		0.13	101.11	89.3443
YQS-8	Ol	Jiaohe	Yu et al. (2009)	41.33	0.03	0.01	0.01	9.37	0.15	49.77	0.03	0.03		0.13	100.86	90.4473
YQS-9	Ol	Jiaohe	Yu et al. (2009)	41.3	0.02	0.01	0.02	9.95	0.15	48.79	0.01	0.04		0.13	100.42	89.7339
YQS-10	Ol	Jiaohe	Yu et al. (2009)	41.38	0.02	0.01	0.02	9.16	0.13	49.87	0.03	0.02		0.38	101.02	90.6584
YQS-11	Ol	Jiaohe	Yu et al. (2009)	41.45	0.02	0.02	0.05	8.89	0.13	50.42	0.03	0.03		0.39	101.43	90.999
YQS-12	Ol	Jiaohe	Yu et al. (2009)	41.3	0	0.01	0.04	9.22	0.12	49.64	0.05	0.02		0.13	100.53	90.5635
YQS-14	Ol	Jiaohe	Yu et al. (2009)	41.15	0.01	0	0.02	8.78	0.12	49.88	0.06	0		0.22	100.24	91.0127
YQS-15	Ol	Jiaohe	Yu et al. (2009)	41.32	0	0	0.02	9.11	0.14	49.65	0.03	0.01		0.13	100.41	90.6673
YQS-16	Ol	Jiaohe	Yu et al. (2009)	41.31	0.01	0.02	0.02	9.4	0.13	49.96	0.05	0.01		0.14	101.05	90.4526
DSH009	Ol	Jiaohe	Hao et al. (2016)	41	0.03	0.01	0.01	10.31	0.12	48.01	0.04			0.39	99.92	89.2481
DSH0012	Ol	Jiaohe	Hao et al. (2016)	40.73	0.01	0.01	0.01	9.52	0.11	48.53	0.04			0.4	99.36	90.0862
DSH0014	Ol	Jiaohe	Hao et al. (2016)	40.75	0.02	0.01	0.01	9.54	0.12	48.59	0.04			0.35	99.43	90.0784
DSH0017	Ol	Jiaohe	Hao et al. (2016)	40.66	0.02	0	0.01	9.35	0.13	48.07	0.05			0.39	98.68	90.1618
17JH4	Ol	Jiaohe	Guo et al. (2020)	40.32	0	0.04	0.12	10.57	0.16	48.65	0.12	0.07	0.02	0.22	100.29	89.1357
17JH5	Ol	Jiaohe	Guo et al. (2020)	40.94	0.03	0.02	0.02	8.39	0.11	49.54	0.05	0.09	0.05	0.39	99.63	91.3235
17JH14	Ol	Jiaohe	Guo et al. (2020)	41.06	0.01	0.02	0.02	7.82	0.11	50.05	0.07	0.03	0.01	0.34	99.54	91.9412
17JH18	Ol	Jiaohe	Guo et al. (2020)	40.45	0.01	0.02	0	9.11	0.11	49.67	0.04	0.1	0.04	0.34	99.89	90.6707
17JH21	Ol	Jiaohe	Guo et al. (2020)	40.91	0.01	0.02		9.34	0.12	49.15	0.06	0.03	0.01	0.31	99.96	90.3664
17JH24	Ol	Jiaohe	Guo et al. (2020)	40.76	0.03	0.03	0.01	8.64	0.14	49.47	0.05	0.07	0.03	0.36	99.59	91.0765
WQ91-1	Ol	Wangqing	Xu et al. (1998)	41.38				10.06	0.16	49.57	0.03			0.37	101.57	89.7786
WQ91-37	Ol	Wangqing	Xu et al. (1998)	41.42				10.31	0.12	48.38	0.15			0.36	100.74	89.3216
WQ91-6	Ol	Wangqing	Xu et al. (1998)	40.84				10.32	0.14	48.09	0.04			0.34	99.77	89.2548
WQ91-11	Ol	Wangqing	Xu et al. (1998)	41.4				9.02	0.11	50.39	0.05			0.44	101.41	90.8744
WQ91-77	Ol	Wangqing	Xu et al. (1998)	41.09				8.7	0.13	49.21	0.04			0.39	99.56	90.9769
WQ91-5	Ol	Wangqing	Xu et al. (1998)	41.13				8.52	0.13	49.85	0.19			0.36	100.18	91.2508
WQ91-13	Ol	Wangqing	Xu et al. (1998)	41.73				9.15	0.14	50.05	0.03			0.45	101.55	90.6981
WQ91-20	Ol	Wangqing	Xu et al. (1998)	40.68				9.25	0.09	48.87	0.04			0.35	99.28	90.4009
WQ91-21	Ol	Wangqing	Xu et al. (1998)	40.77				9.4	0.11	48.41	0.07			0.4	99.16	90.177
WQ91-22	Ol	Wangqing	Xu et al. (1998)	41.43				9.02	0.18	49.87	0.02			0.39	100.91	90.788
WQ5	Ol	Wangqing	Song et al. (2013)	39.64	<0.01	0.01	0.01	10.18	0.16	49.53	0.04			0.38	99.95	89.6618
WQ9	Ol	Wangqing	Song et al. (2013)	40.71	0.05	0.04	<0.01	9.96	0.14	48.49	0.04			0.43	99.86	89.6676
WQ10	Ol	Wangqing	Song et al. (2013)	40.58	0.01	0.02	<0.01	10.78	0.15	47.95	0.04			0.41	99.94	88.8004
WQ13	Ol	Wangqing	Song et al. (2013)	40.68	<0.01	0.06	<0.01	10.03	0.11	48.66	0.03			0.39	99.96	89.6351
WQ15	Ol	Wangqing	Song et al. (2013)	39.84	<0.01	0.01	0.01	9.76	0.15	49.77	0.04			0.38	99.96	90.0891
WQ16	Ol	Wangqing	Song et al. (2013)	39.35	0.03	0.06	<0.01	10.28	0.1	48.94	0.04			0.4	99.2	89.4584
PFS5	Ol	Wangqing	Wang et al. (2013)	38.78		0.04		9.59	0.14	50.54	0.03			0.38	99.5	90.3792
PFS10	Ol	Wangqing	Wang et al. (2013)	40.58		0.02		10.78	0.15	47.95	0.04			0.41	99.93	88.8004
PFS13	Ol	Wangqing	Wang et al. (2013)	40.88		0.03		10.08	0.15	48.26	0.06			0.41	99.87	89.5116
PFS15	Ol	Wangqing	Wang et al. (2013)	38.88		0.05		9.07	0.11	50.83	0.04			0.43	99.41	90.9006
PFS16	Ol	Wangqing	Wang et al. (2013)	39.3		0.05		10.35	0.12	48.85	0.04			0.42	99.13	89.3767
WQ39	Ol	Wangqing	Hao et al. (2016)	40.97	0.02	0	0.01	9.69	0.11	48.32	0.03			0.39	99.54	89.8876
WQ62	Ol	Wangqing	Hao et al. (2016)	40.84	0.01	0.01	0	9.05	0.09	48.85	0.05			0.38	99.28	90.5854
WQ72	Ol	Wangqing	Hao et al. (2016)	40.89	0.02	0	0.02	10.19	0.11	47.83	0.04			0.38	99.48	89.3242
WQ-004	Ol	Wangqing	Hao et al. (2016)	40.4	0	0.01	0.01	10.32	0.18	48.74	0.08	0.01	0	0.17	99.92	89.3829
WQ-005	Ol	Wangqing	Hao et al. (2016)	40.59	0.01	0.05	0.02	9.9	0.14	49.43	0.1	0.02	0	0.15	100.41	89.8992
WQ-006	Ol	Wangqing	Hao et al. (2016)	40.32	0.01	0.01	0.01	10.45	0.16	48.98	0.04	0.01	0	0.15	100.14	89.3105
WQ-101	Ol	Wangqing	Hao et al. (2016)	40.18	0.01	0.01	0.01	10.34	0.16	48.85	0.03	0	0.01	0.17	99.77	89.3859
northeastern NCC
CBH1	Ol	Changbaishan	Liu (2014)	40.97	0.03	0.05		10.01	0.11	48.32	0.06		0.01	0.41	99.97	89.5884
CBH2	Ol	Changbaishan	Liu (2014)	41.03	0.01	0.04		10.5	0.1	47.6	0.02			0.41	99.71	88.9879
CBH3	Ol	Changbaishan	Liu (2014)	40.66	0.04	0.07		9.88	0.11	48.59	0.04		0.01	0.37	99.77	89.761
CBH4	Ol	Changbaishan	Liu (2014)	41.03	0.03	0.04	0.01	10.82	0.11	47.02	0.05	0.01	0.01	0.38	99.51	88.5667
CBH5	Ol	Changbaishan	Liu (2014)	41.22	0.03	0.02		9.42	0.12	48.74	0.06	0.01		0.4	100.02	90.2182
CBH6	Ol	Changbaishan	Liu (2014)	41	0.02	0.06		9.56	0.13	48.34	0.07	0.03	0.01	0.42	99.64	90.0134
CBH7	Ol	Changbaishan	Liu (2014)	40.66	0.03	0.04		9.61	0.14	48.59	0.07	0.02		0.43	99.59	90.0129
CBH8	Ol	Changbaishan	Liu (2014)	40.4	0.02	0.04		9.8	0.13	48.85	0.05	0.01		0.44	99.74	89.8842
BDX-01	Ol	Changbaishan	Par et al. (2017)	40.7804	0.0176667	0.0186	0.021	9.6236	0.144	48.9176	0.054	0.0185	0.00866667	0.3392	99.9772	90.0605
BDX-02	Ol	Changbaishan	Par et al. (2017)	40.7842	0.02	0.0195	0.0133333	10.2554	0.1414	48.6384	0.022	0.00966667	0.016	0.3394	100.304	89.4226
BDX-03	Ol	Changbaishan	Par et al. (2017)	40.7745	0.0255	0.0095	0.0113333	10.173	0.14725	48.5515	0.022	0.0176667	0.01	0.3405	100.112	89.4819
BDX-04	Ol	Changbaishan	Par et al. (2017)	40.7798	0.013	0.013	0.0216667	10.2508	0.1602	48.6012	0.023	0.008	0.00966667	0.3642	100.279	89.4196
BDX-05	Ol	Changbaishan	Par et al. (2017)	40.695	0.003	0.02	0.019	9.803	0.159	48.4567	0.028	0	0.018	0.38875	99.6023	89.8076
BDX-06	Ol	Changbaishan	Par et al. (2017)	40.7093	0.02075	0.0125	0.0125	9.31425	0.1265	49.0057	0.038	0.025	0.0103333	0.38075	99.6769	90.3649
BDX-07	Ol	Changbaishan	Par et al. (2017)	40.6115	0.031	0.015	0.026	10.159	0.15575	48.5315	0.03	0.005	0.0315	0.3635	99.9837	89.4909
BDX-08	Ol	Changbaishan	Par et al. (2017)	40.5288	0.021	0.01175	0.0253333	10.042	0.1395	48.6767	0.029	0.034	0.0155	0.36425	99.9173	89.6272
BDX-09	Ol	Changbaishan	Par et al. (2017)	40.7527	0.012	0.00666667	0.01425	9.82025	0.1325	49.0125	0.027	0.0193333	0.019	0.37075	100.187	89.8956
BDX-13	Ol	Changbaishan	Par et al. (2017)	40.817	0.024	0.0185	0.0223333	9.393	0.14025	49.0022	0.038	0.012	0.007	0.3785	99.8815	90.2907
BDX-14-1	Ol	Changbaishan	Par et al. (2017)	40.9518	0.0185	0.008	0.026	9.495	0.13275	48.9625	0.067	0.021	0.018	0.36275	100.063	90.1884
BDX-14-2	Ol	Changbaishan	Par et al. (2017)	41.008	0.0226667	0.03325	0.05	8.771	0.1195	49.5725	0.073	0.022	0.017	0.37025	100.108	90.9704
BDX-15-1	Ol	Changbaishan	Par et al. (2017)	40.875	0.014	0.028	0.04375	8.78575	0.112	49.1833	0.075	0.01	0.0105	0.3705	99.5634	90.8916
BDX-15-2	Ol	Changbaishan	Par et al. (2017)	40.6737	0.011	0.02	0.0165	9.41325	0.151	48.53	0.033	0.021	0.013	0.38225	99.2909	90.1864
BDX-16-1	Ol	Changbaishan	Par et al. (2017)	40.743	0.0535	0.0135	0.0315	10.0237	0.142667	48.5573	0.062	0.031	0.015	0.389	100.088	89.6213
BDX-16-2	Ol	Changbaishan	Par et al. (2017)	40.8547	0.005	0.007	0.022	10.3337	0.168	48.3093	0.023	0.031	0.009	0.373333	100.164	89.2857
CBS01	Ol	Changbaishan	Xu et al. (2019)	40.201	0.014	0.009	0.014	8.205	0.139	48.339	0.024	0.005	0.006	0.337	97.293	91.3057
CBS02	Ol	Changbaishan	Xu et al. (2019)	40.429	0.003	0	0.057	9.096	0.147	48.791	0.024	0.041	0.102	0.336	99.026	90.5318
CBS03	Ol	Changbaishan	Xu et al. (2019)	41.265	0	0	0.036	9.175	0.123	47.601	0.052	0.002	0.016	0.371	98.641	90.2421
CBS04	Ol	Changbaishan	Xu et al. (2019)	39.88	0.087	0.024	0.045	7.977	0.162	47.245	0.093	0.204	0.094	0.313	96.124	91.3476
CBS05	Ol	Changbaishan	Xu et al. (2019)	41.25	0.018	0	0.003	9.213	0.148	50.219	0.004	0.009	0	0.358	101.222	90.6686
CBS06	Ol	Changbaishan	Xu et al. (2019)	41.196	0.007	0	0.039	9.865	0.139	49.286	0.028	0.017	0.021	0.403	101.001	89.9048
CBS07	Ol	Changbaishan	Xu et al. (2019)	41.183	0	0	0	9.846	0.107	49.712	0.054	0.015	0.016	0.379	101.312	90
CBS08	Ol	Changbaishan	Xu et al. (2019)	41.388	0	0	0.03	9.874	0.156	49.11	0.034	0.033	0.004	0.384	101.013	89.864
CBS09	Ol	Changbaishan	Xu et al. (2019)	42.553	0.022	0.022	0.099	9.853	0.12	50.354	0.043	0.063	0.035	0.396	103.56	90.1086
CBS10	Ol	Changbaishan	Xu et al. (2019)	42.032	0.001	0.009	0	9.772	0.141	50.37	0.032	0.019	0.011	0.38	102.767	90.1847
CBS11	Ol	Changbaishan	Xu et al. (2019)	40.6956	0.0036	0.0006	0.014	9.9602	0.1448	49.2704	0.022	0.003	0.003	0.3754	100.493	89.8144
CBS12	Ol	Changbaishan	Xu et al. (2019)	41.23	0.0004	0.0034	0.0054	8.9384	0.1324	49.5282	0.0446	0.0268	0.0178	0.3514	100.279	90.8065
TC01	Ol	Changbaishan	Xu et al. (2020)	41.28	0.01	0	0.01	9.36	0.12	49.09	0.03	0	0	0.01	99.91	90.3371
TC02	Ol	Changbaishan	Xu et al. (2020)	41.11	0	0	0	10.03	0.13	48.64	0.01	0.01	0	0.01	99.94	90.3371
TC03	Ol	Changbaishan	Xu et al. (2020)	40.79	0	0.01	0	9.21	0.13	49.02	0.04	0	0	0	99.2	90.3371
TC04	Ol	Changbaishan	Xu et al. (2020)	41.55	0	0.02	0.03	8.9	0.11	49.01	0.1	0	0	0.01	99.73	90.3371
TC05	Ol	Changbaishan	Xu et al. (2020)	41.03	0	0.01	0.01	10.12	0.15	48.38	0.02	0	0	0.01	99.73	90.3371
TC06	Ol	Changbaishan	Xu et al. (2020)	41.24	0	0.02	0.02	9.92	0.13	48.6	0.02	0	0	0	99.95	90.3371
TC07	Ol	Changbaishan	Xu et al. (2020)	40.47	0	0	0	10.36	0.13	48.12	0.01	0	0	0	99.09	90.3371
TC08	Ol	Changbaishan	Xu et al. (2020)	41.67	0	0	0.02	9.2	0.12	49.17	0.03	0.01	0	0.01	100.23	90.3371
SJXO-1		Huinan	Xu et al. (2003)
SJXO-2	Ol	Huinan	Xu et al. (2003)	39.75	0	0.6	0.16	9.56	0.09	50.82	0.14	0.04	0.01		101.17	90.4543
SJXO-3	Ol	Huinan	Xu et al. (2003)	40.7	0.01	0.01	0	8.41	0	51.75	0.04	0	0		100.92	91.6449
SJXO-4	Ol	Huinan	Xu et al. (2003)	39.76	0.03	0	0.02	10.38	0.03	50.01	0	0	0.02		100.25	89.5705
SJXO-6	Ol	Huinan	Xu et al. (2003)	39.77	0	0	0.01	11.9	0.26	48.96	0.07	0	0		100.97	88.0009
SJXO-8	Ol	Huinan	Xu et al. (2003)	38.87	0	0.05	0.02	10.01	0.07	50.88	0.11	0	0		100.01	90.0602
DLW-9	Ol	Huinan	Xu et al. (2003)	39.32	0.01	0.06	0.06	9.98	0.02	50.71	0.09	0.01	0.05		100.31	90.0571
DYS-12	Ol	Huinan	Xu et al. (2003)	39.76	0	0.01	0.03	8.94	0.01	51.22	0.02	0.02	0		100.01	91.0816
DYS-5	Ol	Huinan	Xu et al. (2003)	38.5	0.03	0	0.03	10.25	0.02	50.88	0.02	0	0		99.73	89.8461
DYS-9	Ol	Huinan	Xu et al. (2003)	39.72	0	0	0.05	10.75	0.04	49.29	0.08	0.03	0		99.96	89.0987
DLW-3	Ol	Huinan	Xu et al. (2003)	40	0	0.05	0.03	9.33	0.14	50.39	0.13	0	0		100.07	90.5903
DLW-4	Ol	Huinan	Xu et al. (2003)	38.94	0	0.07	0.01	9.57	0.04	51.69	0.01	0	0.01		100.34	90.5909
DLW-5	Ol	Huinan	Xu et al. (2003)	39.27	0	0.04	0	8.78	0.19	52.46	0.08	0.02	0		100.84	91.4168
DLW-6	Ol	Huinan	Xu et al. (2003)	39.57	0.01	0.02	0.09	8.68	0	50.8	0.04	0	0		99.21	91.253
DLW-7	Ol	Huinan	Xu et al. (2003)	40.45	0.04	0	0.08	9.03	0.17	50.65	0.05	0	0		100.47	90.9078
DLW-8	Ol	Huinan	Xu et al. (2003)	39.44	0.02	0	0.04	9.17	0	51.66	0.07	0	0		100.4	90.9438
DYS-1	Ol	Huinan	Xu et al. (2003)	39.94	0	0.01	0.15	9.12	0.07	50.05	0.03	0	0.01		99.38	90.7257
DYS-2	Ol	Huinan	Xu et al. (2003)	39.68	0.01	0.02	0.05	8.83	0.12	50.82	0.1	0.01	0.02		99.66	91.1184
DYS-3	Ol	Huinan	Xu et al. (2003)	40.28	0	0	0	8.5	0	51.25	0.09	0	0		100.12	91.4877
DYS-4	Ol	Huinan	Xu et al. (2003)	38.69	0	0.01	0.04	9.11	0.08	50.87	0.05	0.01	0		98.86	90.8707
DYS-6	Ol	Huinan	Xu et al. (2003)	40.76	0.03	0	0.03	9.17	0.19	50.42	0.04	0.02	0		100.66	90.7417
DYS-7	Ol	Huinan	Xu et al. (2003)	39.36	0.02	0.02	0	8.55	0.02	51.88	0.08	0	0.02		99.95	91.5371
DYS-8	Ol	Huinan	Xu et al. (2003)	40.3	0.02	0.06	0.01	9.09	0.06	49.65	0.1	0.04	0		99.33	90.6859
DYS-21	Ol	Huinan	Xu et al. (2003)	39.97	0	0.03	0.02	8.63	0	52.11	0.07	0	0.03		100.86	91.4991
06JY02	Ol	Huinan	Tang et al. (2012)	40.4	0	0.02	0.01	9.35	0.18	48.8	0.1	0.03	0.04	0.35	99.28	90.2946
06JY06	Ol	Huinan	Tang et al. (2012)	40	0.01	0.02	0.04	9.86	0.15	48.4	0.09	0.01	0.01	0.33	98.92	89.7436
06JY30	Ol	Huinan	Tang et al. (2012)	40.5	0	0.05	0.04	9.72	0.15	48.9	0.12	0	0	0.32	99.8	89.9677
06JY31	Ol	Huinan	Tang et al. (2012)	40.3	0	0.04	0.06	9.01	0.11	48.7	0.13	0.06	0.02	0.35	98.78	90.597
06JY34	Ol	Huinan	Tang et al. (2012)	41	0	0.02	0.05	8.11	0.13	49.6	0.07	0.01	0	0.34	99.33	91.598
DLW1	Ol	Huinan	Wang et al. (2013)	41.32		0.04		9.16	0.12	48.55	0.13			0.43	99.75	90.4287
DLW3	Ol	Huinan	Wang et al. (2013)	40.87		0.04		10.12	0.16	47.56	0.14			0.39	99.28	89.3359
DLW5	Ol	Huinan	Wang et al. (2013)	41.05		0.04		10.14	0.15	48.25	0.15			0.42	100.2	89.4538
DLW6	Ol	Huinan	Wang et al. (2013)	41.21		0.05		8.94	0.12	48.92	0.09			0.43	99.76	90.7013
DLW8	Ol	Huinan	Wang et al. (2013)	40.57		0.05		10.43	0.11	48.36	0.03			0.41	99.96	89.2067
DYS1	Ol	Huinan	Wang et al. (2013)	41.16		0.07		8.94	0.14	48.98	0.1			0.39	99.78	90.7116
DYS4	Ol	Huinan	Wang et al. (2013)	40.8		0.07		10.46	0.1	47.94	0.1			0.36	99.83	89.0946
DYS5	Ol	Huinan	Wang et al. (2013)	41.14		0.06		9.02	0.14	49.12	0.08			0.36	99.92	90.6605
DYS7	Ol	Huinan	Wang et al. (2013)	41.3		0.06		8.98	0.09	48.68	0.06			0.39	99.56	90.6219
DYS9	Ol	Huinan	Wang et al. (2013)	41.38		0.05		10.03	0.1	47.24	bd			0.41	99.21	89.3567
DYS12	Ol	Huinan	Wang et al. (2013)	41.83		0.02		9.06	0.11	48.75	0.06			0.44	100.27	90.5585
DYS13	Ol	Huinan	Wang et al. (2013)	41.39		0.06		8.91	0.12	48.65	0.08			0.39	99.6	90.683
DYS14	Ol	Huinan	Wang et al. (2013)	41.17		0.03		8.89	0.12	49.46	0.02			0.43	100.12	90.8403
LQL1	Ol	Huinan	Wang et al. (2013)	40.64		0.06		9.71	0.12	48.46	0.11			0.41	99.51	89.8952
LQL3	Ol	Huinan	Wang et al. (2013)	41.2		0.04		9.85	0.11	48.13	0.03			0.4	99.76	89.7014
LQL4	Ol	Huinan	Wang et al. (2013)	40.5		0.08		10.02	0.13	48.73	0.11			0.37	99.94	89.6577
LQL6	Ol	Huinan	Wang et al. (2013)	35.21		0.11		9.33	0.12	45.49	0.2			0.37	90.83	89.6813
LQL7	Ol	Huinan	Wang et al. (2013)	40.3		0.05		10.73	0.15	48.01	0.06			0.42	99.72	88.8589
LQL8	Ol	Huinan	Wang et al. (2013)	40.34		0.49		10.59	0.15	47.42	0.13			0.4	99.52	88.8665
HLW1	Ol	Huinan	Liu (2014)	41.15	0.04		0.04	9.13	0.13	48.72	0.13	0.01	0.01	0.4	99.76	90.4872
HLW2	Ol	Huinan	Liu (2014)	41.31		0.02	0.04	8.95	0.12	48.63	0.16	0.02	0.03	0.36	99.64	90.6416
HLW3	Ol	Huinan	Liu (2014)	41.02	0.01	0.03	0.06	10.25	0.13	47.33	0.11			0.42	99.36	89.167
HLW4	Ol	Huinan	Liu (2014)	41	0.05		0.02	10.07	0.15	47.69	0.12	0.02		0.39	99.51	89.4089
HLW5	Ol	Huinan	Liu (2014)	41.11	0.04	0.04		10.26	0.13	47.63	0.03	0.01		0.4	99.65	89.2185
HYZ1	Ol	Huinan	Liu (2014)	41.54	0.05	0.07	0.01	8.87	0.1	48.6	0.07			0.39	99.7	90.7122
HYZ2	Ol	Huinan	Liu (2014)	41.2	0.02	0.1		10.38	0.13	47.5	0.1	0.05		0.37	99.85	89.0796
HYZ3	Ol	Huinan	Liu (2014)	41.57	0.04	0.06	0.08	9	0.13	48.53	0.07	0.02		0.41	99.91	90.5766
HYZ4	Ol	Huinan	Liu (2014)	41.18	0.05	0.06	0.02	9.04	0.12	48.6	0.1			0.4	99.57	90.5511
HYZ5	Ol	Huinan	Liu (2014)	40.61	0.02	0.05		9.89	0.15	48.78	0.03	0.01	0.01	0.4	99.95	89.7876
HYZ6	Ol	Huinan	Liu (2014)	40.96	0.03	0.04		9.11	0.13	48.96	0.05	0.03		0.41	99.72	90.5482
HYZ7	Ol	Huinan	Liu (2014)	41.54	0.04	0.06		8.85	0.12	48.77	0.08			0.42	99.88	90.7606
HYZ8	Ol	Huinan	Liu (2014)	40.7	0.02	0.04		9.05	0.15	49.21	0.04			0.41	99.62	90.6479
HQL1	Ol	Huinan	Liu (2014)	40.98	0.02	0.08	0.05	9.82	0.1	48.47	0.09	0.02		0.38	100.01	89.7943
HQL2	Ol	Huinan	Liu (2014)	40.97	0.01	0.06		9.84	0.11	48.03	0.05	0.02		0.34	99.43	89.6916
HQL3	Ol	Huinan	Liu (2014)	40.74	0.01	0.08	0.02	9.93	0.1	48.26	0.13	0.04		0.43	99.74	89.6515
HQL4	Ol	Huinan	Liu (2014)	40.44	0.01	0.07		10.72	0.11	48.1	0.05			0.37	99.87	88.8867
HQL5	Ol	Huinan	Liu (2014)	40.84	0.05	0.08		10.53	0.12	47.83	0.12			0.37	99.94	89.0071
HNd065	Ol	Huinan	Lin et al. (2019)	41.216				8.62517	0.126833	49.5583	0.0781667	0.0262			99.6638	91.1049
HNd066	Ol	Huinan	Lin et al. (2019)	41.5664				8.77986	0.133286	49.1006	0.0662857	0.0378571			99.7424	90.8832
HNd067	Ol	Huinan	Lin et al. (2019)	41.7553			0.11	8.27033	0.1255	49.7495	0.0615				100.072	91.4696
HNd068	Ol	Huinan	Lin et al. (2019)	41.5715				8.23217	0.113833	49.4362	0.0686667	0.033			99.4975	91.4564
HNd069	Ol	Huinan	Lin et al. (2019)	41.9215				8.304	0.131167	49.1427	0.0746667	0.0255			99.6517	91.3413
HNd071	Ol	Huinan	Lin et al. (2019)	41.4232				8.311	0.1082	49.135	0.0682	0.0302			99.139	91.3334
HNd074	Ol	Huinan	Lin et al. (2019)	41.5225				8.32767	0.1215	49.3295	0.0858333				99.4493	91.3488
HNd075	Ol	Huinan	Lin et al. (2019)	41.7004				8.6312	0.1234	49.358	0.056	0.0318			99.9536	91.0663
HNd072	Ol	Huinan	Lin et al. (2019)	41.6976				8.70029	0.121571	49.3431	0.0652857	0.0325714			100.02	90.9988
HNd077	Ol	Huinan	Lin et al. (2019)	41.6342				8.8815	0.114333	48.9625	0.0946667				99.7795	90.7638
HNd085	Ol	Huinan	Lin et al. (2019)	41.6712				8.9474	0.1248	48.6748	0.0958	0.0286			99.5806	90.6518
HNd087	Ol	Huinan	Lin et al. (2019)	41.1802				9.629	0.14	48.5634	0.1	0.0438			99.7198	89.9902
J001*	Ol	Huinan	Lin et al. (2019)	41.13	0.03		0.11	9.65	0.13	48.46	0.11				99.71	89.9513
J079*	Ol	Huinan	Lin et al. (2019)	40.87	0.04			9.72	0.12	48.26	0.09				99.2	89.8481
J082*	Ol	Huinan	Lin et al. (2019)	40.68	0.03	0.08	0.86	9.67	0.12	47.7	0.11		0.03		99.29	89.7886
J083*	Ol	Huinan	Lin et al. (2019)	41.13	0.03			9.77	0.12	48.21	0.03				99.33	89.7917
J193*	Ol	Huinan	Lin et al. (2019)	40.83		0.07		10.1	0.13	48.08	0.15				99.39	89.4578
J197*	Ol	Huinan	Lin et al. (2019)	40.85	0.04			10.41	0.13	47.75	0.1				99.31	89.1025
J198*	Ol	Huinan	Lin et al. (2019)	40.88		0.09		10.32	0.13	47.63	0.16	0.03			99.27	89.1623
J206*	Ol	Huinan	Lin et al. (2019)	40.82	0.03			8.91	0.11	49.63	0.05				99.59	90.8501
J247*	Ol	Huinan	Lin et al. (2019)	41.15	0.03	0.06		9.69	0.12	48.31	0.06				99.45	89.8857
J294*	Ol	Huinan	Lin et al. (2019)	40.69	0.04			10.13	0.12	48.48	0.02				99.54	89.5078
J328*	Ol	Huinan	Lin et al. (2019)	41.06	0.03			10.15	0.11	47.97	0.09				99.47	89.3894
J300*	Ol	Huinan	Lin et al. (2019)	40.57	0.03	0.08		10.94	0.14	48	0.13	0.03			99.9	88.6635
J301*	Ol	Huinan	Lin et al. (2019)	40.55	0.03	0.05		10.89	0.12	48.03	0.13				99.81	88.7157
J298*	Ol	Huinan	Lin et al. (2019)	41.08	0.04	0.05		9	0.09	49.42	0.11				99.8	90.7306
J230*	Ol	Huinan	Lin et al. (2019)	40.81				11.19	0.12	47.14	0.06	0.03			99.42	88.2482
J297*	Ol	Huinan	Lin et al. (2019)	40.56	0.03	0.08		11.45	0.14	46.92	0.13				99.32	87.9584
LG01	Ol	Huinan	Xu et al. (2019)	41.541	0.0086	0.0082	0.0098	8.97	0.1202	49.8762	0.048	0.024	0.0134	0.4208	101.04	90.8354
LG02	Ol	Huinan	Xu et al. (2019)	41.1594	0.0098	0.0074	0.0102	9.9144	0.1478	49.6228	0.0568	0.0296	0.0056	0.377	101.341	89.9213
LG03	Ol	Huinan	Xu et al. (2019)	40.169	0	0.053	0.03	12.588	0.148	47.022	0.151	0.036	0.008	0.345	100.55	86.9429
LG04	Ol	Huinan	Xu et al. (2019)	41.13	0.021	0.064	0.034	12.653	0.15	47.586	0.168	0.019	0.004	0.354	102.183	87.0196
LG05	Ol	Huinan	Xu et al. (2019)	41.113	0	0.036	0.011	12.383	0.148	47.618	0.199	0.019	0.006	0.336	101.869	87.2687
LG06	Ol	Huinan	Xu et al. (2019)	41.394	0	0.012	0.026	9.875	0.149	49.551	0.083	0.027	0	0.361	101.478	89.9442
LG07	Ol	Huinan	Xu et al. (2019)	41.155	0	0.011	0.03	9.653	0.153	49.378	0.082	0.016	0.005	0.371	100.854	90.1169
LG08	Ol	Huinan	Xu et al. (2019)	41.338	0	0.004	0.008	10.173	0.14	49.73	0.056	0.007	0.005	0.376	101.837	89.7055
LG09	Ol	Huinan	Xu et al. (2019)	41.506	0	0.009	0	8.635	0.135	50.244	0.094	0.011	0.007	0.35	100.991	91.2065
LG10	Ol	Huinan	Xu et al. (2019)	41.27	0.012	0	0.027	8.631	0.125	50.735	0.067	0.005	0	0.347	101.219	91.2879
LG01	Ol	Huinan	Xu et al. (2020)	41.22	0	0.01	0.01	9.89	0.13	48.45	0.08	0.01	0	0	99.8	89.7252
LG02	Ol	Huinan	Xu et al. (2020)	41.11	0.01	0.01	0.01	10.4	0.13	48.57	0.06	0.01	0	0	100.31	89.276
LG03	Ol	Huinan	Xu et al. (2020)	40.44	0	0.03	0.02	13.74	0.15	45.32	0.16	0.02	0	0.01	99.89	85.4642
LG04	Ol	Huinan	Xu et al. (2020)	41.49	0	0.01	0.01	10.06	0.13	48.5	0.03	0.01	0	0	100.24	89.5766
LG05	Ol	Huinan	Xu et al. (2020)	41.41	0	0.01	0.02	9.94	0.13	48.58	0.03	0	0.01	0.01	100.14	89.7034
LG06	Ol	Huinan	Xu et al. (2020)	40.87	0	0	0	10	0.13	48.44	0.03	0	0	0.01	99.48	89.6208
LG07	Ol	Huinan	Xu et al. (2020)	41.5	0	0.01	0.03	8.84	0.11	49.44	0.13	0.01	0	0.01	100.08	90.8837
LG08	Ol	Huinan	Xu et al. (2020)	41.22	0	0.01	0.01	8.47	0.12	49.7	0.07	0.01	0	0.01	99.62	91.2737
LG09	Ol	Huinan	Xu et al. (2020)	40.97	0	0	0.01	9.03	0.11	49.32	0.04	0.01	0	0.01	99.5	90.6855
LG11	Ol	Huinan	Xu et al. (2020)	40.58	0	0.01	0.02	10.4	0.14	48.17	0.1	0.01	0	0.01	99.44	89.1966
LG12	Ol	Huinan	Xu et al. (2020)	40.76	0	0	0.01	10.11	0.15	48.39	0.02	0	0	0.01	99.45	89.5089
LG13	Ol	Huinan	Xu et al. (2020)	41.22	0	0	0.01	11.15	0.15	47.4	0.06	0.01	0.01	0	100.01	88.3421
HY1-01	Ol	Kuandian	Wu et al. (2006)	40.68	0.04	0	0.03	8.5	0.1	50.66	0.06	0.06	0.01	0.43	100.57	91.3971
HY2-01	Ol	Kuandian	Wu et al. (2006)	40.05	0	0	0	8.97	0.11	50.09	0.04	0.01	0	0.34	99.61	90.871
HY2-02	Ol	Kuandian	Wu et al. (2006)	40.5	0	0.01	0.01	9.26	0.14	49.19	0.15	0.02	0.03	0.35	99.66	90.4481
HY2-03	Ol	Kuandian	Wu et al. (2006)	40.4	0.04	0.01	0	9.69	0.16	50.41	0.01	0.04	0	0.37	101.13	90.266
HY2-04	Ol	Kuandian	Wu et al. (2006)	40.15	0	0.02	0	10.02	0.1	50.06	0.05	0.01	0	0.35	100.76	89.9047
HY2-05	Ol	Kuandian	Wu et al. (2006)	40.53	0	0.01	0	8.37	0.17	50.72	0.04	0.02	0.02	0.29	100.17	91.5267
HY2-06	Ol	Kuandian	Wu et al. (2006)	39.76	0	0.02	0.04	9.35	0.16	49.52	0.01	0.01	0	0.33	99.2	90.4222
HY2-07	Ol	Kuandian	Wu et al. (2006)	39.85	0.05	0.07	0.05	9.8	0.17	49.64	0.1	0.03	0.02	0.31	100.09	90.0291
HY2-14	Ol	Kuandian	Wu et al. (2006)	40.4	0	0.06	0.01	9.13	0.14	50.09	0.07	0.01	0.01	0.37	100.29	90.7232
HY2-29	Ol	Kuandian	Wu et al. (2006)	40.24	0.01	0.04	0	10.2	0.14	49.93	0.05	0.03	0	0.43	101.07	89.718
DCT1	Ol	Kuandian	Wang et al. (2013)	38.42		0.03		11.09	0.11	49.28	0.04				98.97	88.7905
DCT2	Ol	Kuandian	Wang et al. (2013)	40.72		0.02		9.07	0.08	49.37	0.03				99.29	90.6567
DCT3	Ol	Kuandian	Wang et al. (2013)	40.18		0.04		9.23	0.11	49.42	0.02				99	90.5162
DCT5	Ol	Kuandian	Wang et al. (2013)	38.24		0.09		9.73	0.13	50.94	0.13				99.26	90.3216
DCT8	Ol	Kuandian	Wang et al. (2013)	39.14		0.02		9.42	0.1	49.93	0.05				98.66	90.4291
DCT9	Ol	Kuandian	Wang et al. (2013)	38.74		0.08		10.31	0.06	49.53	0.07				98.79	89.5436
HYS1	Ol	Kuandian	Wang et al. (2013)	38.93		0.05		10.33	0.11	49.28	0.01				98.71	89.4779
HYS4	Ol	Kuandian	Wang et al. (2013)	38.51		0.02		10.8	0.1	49.33	0.02				98.78	89.0614
HYS2	Ol	Kuandian	Wang et al. (2013)	38.85		0.03		10.18	0.08	49.73	0.02				98.89	89.6991
HYS7	Ol	Kuandian	Wang et al. (2013)	38.85		0.04		10.96	0.13	49.08	0.01				99.07	88.8672
HYS13	Ol	Kuandian	Wang et al. (2013)	38.78		0.08		10.29	0.14	49.26	0.16				98.71	89.5105
HYS14	Ol	Kuandian	Wang et al. (2013)	38.43		0.08		9.22	0.11	50.92	0.03				98.79	90.7789
HYS24	Ol	Kuandian	Wang et al. (2013)	38.47		0.02		9.43	0.16	50.77	0.12				98.97	90.5634
HYS26	Ol	Kuandian	Wang et al. (2013)	39.29		0.04		11.45	0.14	48.01	0.07				99	88.1996
QYS8	Ol	Kuandian	Wang et al. (2013)	38.2		0.04		9.13	0.11	51.41	0.06				98.95	90.9399
QYS10	Ol	Kuandian	Wang et al. (2013)	40.94		0.05		10.32	0.11	47.85	0				99.27	89.2067
QYS14	Ol	Kuandian	Wang et al. (2013)	41.21		0.05		10.06	0.09	48.05	0.06				99.52	89.4893
QYS15	Ol	Kuandian	Wang et al. (2013)	40.77		0.06		10.06	0.14	48.24	0.11				99.38	89.5263
QYS18	Ol	Kuandian	Wang et al. (2013)	40.64		0.05		11.08	0.14	47.49	0.06				99.46	88.4262
KCT1	Ol	Kuandian	Liu (2014)	40.71	0.03	0.04		9.37	0.14	48.87	0.09			0.42	99.67	90.2885
KCT2	Ol	Kuandian	Liu (2014)	39.3	0.05	0.04		8.29	0.12	51.4	0.01		0.01	0.39	99.61	91.7028
KCT3	Ol	Kuandian	Liu (2014)	38.29	0.02	0.04	0.01	10.92	0.1	49.3	0.08	0.02		0.39	99.17	88.9474
KCT4	Ol	Kuandian	Liu (2014)	38.07	0.02	0.09		9.4	0.14	50.9	0.08		0.01	0.37	99.08	90.6124
KCT5	Ol	Kuandian	Liu (2014)	38.47	0.02	0.05		9.37	0.14	50.92	0.09	0.04	0.02	0.38	99.5	90.6429
KCT6	Ol	Kuandian	Liu (2014)	38.73	0.05	0.21	0.06	10.89	0.06	48.6	0.16	0.09		0.39	99.24	88.8333
KHY1	Ol	Kuandian	Liu (2014)	37.91	0.04	0.05		9.39	0.12	51.23	0.02		0.03	0.41	99.2	90.6762
KHY2	Ol	Kuandian	Liu (2014)	38.52		0.01		10.78	0.13	49.22	0.03	0.03		0.41	99.13	89.0578
KHY3	Ol	Kuandian	Liu (2014)	38.79	0.03	0.04		10.03	0.11	49.5	0.16	0.02		0.42	99.1	89.793
KHY4	Ol	Kuandian	Liu (2014)	38.85	0.01	0.04		10.96	0.13	49.08	0.01			0.43	99.51	88.8672
KHY5	Ol	Kuandian	Liu (2014)	38.34	0.03	0.09	0.02	12.6	0.13	47.6	0.19	0.01		0.41	99.42	87.0702
KHY6	Ol	Kuandian	Liu (2014)	38.86	0.03	0.06		11.24	0.13	48.4	0.12	0.06	0.01	0.39	99.3	88.4736
KHY7	Ol	Kuandian	Liu (2014)	39.39	0.03	0.04		9.87	0.14	49.21	0.05	0.11	0.01	0.37	99.22	89.8862
KHY8	Ol	Kuandian	Liu (2014)	39.35	0.06	0.05		10.71	0.16	48.42	0.04			0.38	99.17	88.9612
KQS1	Ol	Kuandian	Liu (2014)	38.24	0.05	0.04	0.1	9.63	0.14	50.72	0.1	0.01		0.36	99.39	90.374
KQS2	Ol	Kuandian	Liu (2014)	40.76	0.03	0.05		10.42	0.15	47.5	0.03		0.01	0.39	99.34	89.0421
KQS3	Ol	Kuandian	Liu (2014)	41.12	0.03	0.04	0.02	10.28	0.15	47.84	0.07	0.02		0.37	99.94	89.2421
KQS4	Ol	Kuandian	Liu (2014)	40.46	0.04	0.07	0.07	10.74	0.13	47.38	0.12	0.03		0.23	99.27	88.7182
KQS5	Ol	Kuandian	Liu (2014)	40.99		0.06		10.06	0.14	48.24	0.11	0.01	0.01	0.39	100.01	89.5263
far-eastern Russia (FEE)
R42-5	Ol	Sviyagin	Guo et al. (2017)	40.83	0.01	0	0.01	10	0.14	47.9	0.05	0	0	0.37	99.31	89.5161
R42-6	Ol	Sviyagin	Guo et al. (2017)	41.35	0.02	0.01	0.02	8.34	0.12	48.88	0.06	0	0	0.4	99.2	91.2644
R42-7	Ol	Sviyagin	Guo et al. (2017)	41.05	0.01	0	0	9.96	0.14	47.67	0.04	0	0.01	0.36	99.23	89.5085
R42-8	Ol	Sviyagin	Guo et al. (2017)	41.03	0	0.01	0.01	9.27	0.14	48.25	0.03	0	0	0.37	99.1	90.2706
R42-9	Ol	Sviyagin	Guo et al. (2017)	40.9	0	0.01	0.02	9.65	0.13	47.71	0.06	0	0.01	0.36	98.84	89.8095
R42-10	Ol	Sviyagin	Guo et al. (2017)	41.09	0	0	0.02	9.75	0.13	47.87	0.03	0.01	0.01	0.38	99.28	89.7456
R42-11	Ol	Sviyagin	Guo et al. (2017)	40.8	0.02	0	0.01	9.89	0.13	47.65	0.05	0	0	0.37	98.92	89.5707
R42-12	Ol	Sviyagin	Guo et al. (2017)	40.83	0	0.01	0.03	9.87	0.13	47.7	0.05	0	0	0.36	98.98	89.5993
Sv-1	Ol	Sviyagin	Ionov et al. (2020)	40.795				10.0865	0.1155	50.101	0.0405			0.335	101.887	89.852
Sv-2	Ol	Sviyagin	Ionov et al. (2020)	40.4523				10.1447	0.137	49.6087	0.0353333			0.335333	100.925	89.7087
Sv-4	Ol	Sviyagin	Ionov et al. (2020)	40.552				9.9255	0.141	50.479	0.039			0.357	101.519	90.0653
Sv-7	Ol	Sviyagin	Ionov et al. (2020)	40.996				9.58767	0.157333	50.4277	0.0273333			0.341333	101.616	90.362
Sv-8	Ol	Sviyagin	Ionov et al. (2020)	40.6437				10.036	0.131	50.1307	0.0456667			0.336667	101.362	89.9031
Sv-9	Ol	Sviyagin	Ionov et al. (2020)	40.629				10.5897	0.170667	49.9643	0.0286667			0.369667	101.77	89.3735
Sv-12	Ol	Sviyagin	Ionov et al. (2020)	40.8585				10.132	0.1605	50.358	0.031			0.3385	101.91	89.8576
Sv-13	Ol	Sviyagin	Ionov et al. (2020)	40.8547				10.3227	0.130667	50.156	0.031			0.356667	101.924	89.6492
Sv-14	Ol	Sviyagin	Ionov et al. (2020)	41.0315				9.91	0.146	50.6695	0.05			0.344	102.237	90.1128
Sv-15	Ol	Sviyagin	Ionov et al. (2020)	41.0615				9.995	0.157	50.193	0.0395			0.3645	101.911	89.9514
Sv-16	Ol	Sviyagin	Ionov et al. (2020)	40.669				10.694	0.1745	49.665	0.027			0.3605	101.608	89.2224
Sv-17	Ol	Sviyagin	Ionov et al. (2020)	40.8925				9.8905	0.1395	50.361	0.079			0.3505	101.779	90.0759
Sv-18	Ol	Sviyagin	Ionov et al. (2020)	40.9855				10.2895	0.1575	49.878	0.0575			0.348	101.809	89.6275
Sv-19	Ol	Sviyagin	Ionov et al. (2020)	40.7975				10.1535	0.16	49.3715	0.029			0.322	100.879	89.6563
Sv-20	Ol	Sviyagin	Ionov et al. (2020)	40.716				9.5125	0.141	50.2735	0.048			0.3245	101.06	90.4038
Sv-21	Ol	Sviyagin	Ionov et al. (2020)	40.779				10.0585	0.1195	50.102	0.0285			0.3175	101.436	89.8775
Sv-22	Ol	Sviyagin	Ionov et al. (2020)	40.743				10.549	0.153	49.3945	0.0225			0.3345	101.238	89.3009
Sv-24	Ol	Sviyagin	Ionov et al. (2020)	40.409				10.383	0.139	49.576	0.063			0.369	101.04	89.4861
Sv-27	Ol	Sviyagin	Ionov et al. (2020)	40.597				10.312	0.167	49.933	0.021			0.349	101.433	89.6174
Sv-28	Ol	Sviyagin	Ionov et al. (2020)	40.515				10.133	0.1565	49.5565	0.0385			0.3305	100.802	89.7096
Sv-29	Ol	Sviyagin	Ionov et al. (2020)	41.1057				10.5053	0.159667	49.394	0.0573333			0.328333	101.65	89.3404
Sv-32	Ol	Sviyagin	Ionov et al. (2020)	41.8145				8.4045	0.1315	48.222	0.0415			0.375	99.018	91.0934
Sv-36	Ol	Sviyagin	Ionov et al. (2020)	41.857				9.7555	0.146	47.4455	0.069			0.3545	99.6935	89.6581
Pod-1	Ol	Podgelban	Ionov et al. (2020)	41.933				10.016	0.1375	47.2345	0.039			0.3625	99.75	89.3689
Pod-2	Ol	Podgelban	Ionov et al. (2020)	42.1255				10.426	0.171	47.1415	0.0365			0.3645	100.301	88.9623
Pod-3	Ol	Podgelban	Ionov et al. (2020)	40.55				10.728	0.169	47.9995	0.0725			0.3615	99.929	88.8586
Pod-4	Ol	Podgelban	Ionov et al. (2020)	40.6195				10.679	0.16	47.938	0.0735			0.381	99.905	88.8912
Pod-5	Ol	Podgelban	Ionov et al. (2020)	41.836				10.514	0.17	47.2395	0.035			0.371	100.202	88.9
Ol, olivine. Mg# = 100×Mg/(Mg +Fetotal) molar.
References
Guo, P., Xu, W. L., Wang, C. G., Wang, F., Ge, W. C., Sorokin, A. A. & Wang, Z. W. (2017). Age and evolution of the lithospheric mantle beneath the Khanka Massif: geochemical and Re–Os isotopic evidence from Sviyagino mantle xenoliths. Lithos 282-283, 326-338.
Guo, P., Ionov, D. A., Xu, W. L., Wang, C. G. & Luan, J. P. (2020). Mantle and recycled oceanic crustal components in mantle xenoliths from northeastern china and their mantle sources. Journal of Geophysical Research: Solid Earth 125.
Ionov, D. A., Guo, P., Nelson, W. R., Shirey, S. B. & Willbold, M. (2020). Paleoproterozoic melt-depleted lithospheric mantle in the Khanka block, far eastern Russia: Inferences for mobile belts bordering the North China and Siberian cratons. Geochimica et Cosmochimica Acta 270, 95-111.
Hao, Y. T., Xia, Q. K., Jia, Z. B., Zhao, Q. C., Li, P., Feng, M. & Liu, S. C. (2016). Regional heterogeneity in the water content of the Cenozoic lithospheric mantle of Eastern China. Journal of Geophysical Research: Solid Earth 121, 517-537.
Lin, A. B., Zheng, J. P., Xiong, Q., Aulbach, S., Lu, J. G., Pan, S. K., Dai, H. K. & Zhang, H. (2019). A refined model for lithosphere evolution beneath the decratonized northeastern North China Craton. Contributions to Mineralogy and Petrology 174, 15.
Liu, J. L. (2014). Comparative study on nature of subcontinental lithosphere mantle in northeastern margin of the North China Craton and Northeast Orogenic Belt. Doctoral thesis. (In Chinese with English abstract)
Pan, S. K., Zheng, J. P., Chu, L. L. & Griffin, W. L. (2013). Coexistence of the moderately refractory and fertile mantle beneath the eastern Central Asian Orogenic Belt. Gondwana Research 23, 176-189.
Pan, S. K., Zheng, J. P., Griffin, W. L., Xu, Y. X. & Li, X. Y. (2015). Nature and evolution of the lithospheric mantle beneath the eastern Central Asian Orogenic Belt: Constraints from peridotite xenoliths in the central part of the Great Xing'an Range, NE China. Lithos 238, 52-63.
Park, K., Choi, S. H., Cho, M. & Lee, D. C. (2017). Evolution of the lithospheric mantle beneath Mt. Baekdu (Changbaishan): Constraints from geochemical and Sr–Nd–Hf isotopic studies on peridotite xenoliths in trachybasalt. Lithos 286, 330-344.
Song, Y., Wang, J., Liu, J. L., Xie, Z. P. & Hattori, K. H. (2013). Mineral chemistry of mantle xenoliths in Cenozoic basalts from Wangqing, eastern Jilin: implications for formation of newly accreted sub-continental mantle earth. Science Frontiers 20, 96-107. (In Chinese with English abstract)
Tang, Y. J., Zhang, H. F., Deloule, E., Su, B. X., Ying, J. F., Xiao, Y. & Hu, Y. (2012). Slab-derived lithium isotopic signatures in mantle xenoliths from northeastern North China Craton. Lithos 149, 79-90.
Tian, G. C., Liu, J. G., Scott, J. M., Chen, L. H., Pearson, D. G., Chu, Z. Y., Wang, Z. C. & Luo Y. (2020). Architecture and evolution of the lithospheric roots beneath circum-cratonic orogenic belts–the Xing’an Mongolia Orogenic Belt and its relationship with adjacent North China and Siberian cratonic roots. Lithos (submitted).
Wang, J., Hattori, K. H. & Xie, Z. P. (2013). Oxidation state of lithospheric mantle along the northeastern margin of the North China Craton: implications for geodynamic processes. International Geology Review 55, 1418-1444.
Wu, F. Y., Walker, R. J., Yang, Y. H., Yuan, H. L. & Yang, J. H. (2006). The chemical-temporal evolution of lithospheric mantle underlying the North China Craton. Geochimica et Cosmochimica Acta 70, 5013-5034.
Xu, Q. H., Liu, J. Q., He, H. Y. & Zhang, Y. H. (2019). Nature and evolution of the lithospheric mantle revealed by water contents and He-Ar isotopes of peridotite xenoliths from Changbaishan and Longgang basalts in Northeast China. Science Bulletin 64, 1325-1335.
Xu, Q. H., Liu, J. Q., Mo, X. X., He, H. Y., Zhang, Y. H. & Zhao, W. B. (2020). Characteristics of the lithospheric mantle revealed by peridotite xenoliths from Changbaishan volcanic rocks. Acta Petrologica Sinica 36, 2047-2066. (In Chinese with English abstract)
Xu, Y. G., Ross, J. V. & Mercier, J. C. C. (1993). The upper mantle beneath the continental rift of Tanlu, Eastern China: evidence for the intra-lithospheric shear zones. Tectonophysics 225, 337-360.
Xu, Y. G., Menzies, M. A., Vroon, P., Mercier, J. C. & Lin, C. Y. (1998). Texture–temperature–geochemistry relationships in the upper mantle as revealed from spinel peridotite xenoliths from Wangqing, NE China. Journal of Petrology 39, 469-493.
Xu, Y. G., Menzies, M. A., Thirlwall, M. F., Huang, X. L., Liu, Y. & Chen, X. M. (2003). “Reactive” harzburgites from Huinan, NE China: products of the lithosphere-asthenosphere interaction during lithospheric thinning? Geochimica et Cosmochimica Acta 67, 487-505.
Yu, S. Y., Xu, Y. G., Huang, X. L., Ma, J. L., Ge, W. C., Zhang, H. H. & Qin, X. F. (2009). Hf–Nd isotopic decoupling in continental mantle lithosphere beneath Northeast China: effects of pervasive mantle metasomatism. Journal of Asian Earth Sciences 35, 554-570.
Zhang, M., Yang, J. H., Sun, J. F., Wu, F. Y. & Zhang, M. (2012). Juvenile subcontinental lithospheric mantle beneath the eastern part of the Central Asian Orogenic Belt. Chemical Geology 328, 109-122.
Zhang, Y. L (2011). Isotopic compositions of the peridotite xenoliths and age of the subcontinental lithospheric mantle in the Great Xing'an Range. Doctoral thesis. (In Chinese with English abstract)
Zhang, Y. L., Liu, C. Z., Ge, W. C., Wu, F. Y. & Chu, Z. Y. (2011). Ancient sub-continental lithospheric mantle (SCLM) beneath the eastern part of the Central Asian Orogenic Belt (CAOB): Implications for crust–mantle decoupling. Lithos 126, 233-247.
Zhang, Y. L., Ge, W. C., Sun, J., Yang, H., Liu, Z. C. & Liu, J. G. (2019). Age and composition of the subcontinental lithospheric mantle beneath the Xing'an–Mongolia Orogenic Belt: Implications for the construction of microcontinents during accretionary orogenesis. Lithos 326, 556-571.
Zhao, Y. W. & Fan, Q. C. (2011). Characteristics of lithospheric mantle beneath the Great Xing'an Range: evidence from spinel peridotite xenoliths in the Halaha River and Chaoer River area. Acta Petrologica Sinica 27, 2833-2841. (In Chinese with English abstract)
Zhou, Q., Wu, F. Y., Chu, Z. Y., Yang, Y. H., Sun, D. Y. & Ge, W. C. (2007). Sr-Nd-Hf-Os isotopic characterizations of the Jiaohe peridotite xenoliths in Jilin province and constraints on the lithospheric mantle age in northeastern China. Acta Petrologica Sinica 23, 1269-1280. (In Chinese with English abstract)
Zhou, Q., Wu, F. Y., Chu, Z. Y. & Ge, W. C. (2010). Isotopic compositions of mantle xenoliths and age of the lithospheric mantle in Yitong, Jilin Province. Acta Petrologica Sinica 26, 1241-1264. (In Chinese with English abstract)

## Sheet: Ref. Opx
Sample	Mineral	Locality	Reference	SiO2	TiO2	Al2O3	Cr2O3	FeO	MnO	MgO	CaO	Na2O	K2O	NiO	Total	Mg#
northwestern NEC
KL3-10	Opx	Keluo	Zhang et al. (2011)	55.8677	0.0693333	3.042	0.449	5.62133	0.129667	33.7377	0.665	0.0323333	0.003	0.0676667	99.6847	91.4518
KL3-24	Opx	Keluo	Zhang et al. (2011)	55.3787	0.101333	2.70233	0.493667	5.47067	0.136667	33.7743	0.410333	0.066	0.004	0.0783333	98.6163	91.6701
KL3-26	Opx	Keluo	Zhang et al. (2011)	55.3815	0.10025	3.74625	0.41825	6.162	0.1435	33.184	0.409	0.08275	0.00975	0.08475	99.722	90.5656
KL3-27-1	Opx	Keluo	Zhang et al. (2011)	54.9325	0.1275	3.6865	0.441	6.312	0.1215	33.1485	0.2695	0.1535	0.016	0.0795	99.288	90.3488
KL3-27-2	Opx	Keluo	Zhang et al. (2011)	56.8043	0.0906667	1.00567	0.167667	7.287	0.178667	33.8187	0.138	0.0246667	0.00133333	0.065	99.5817	89.2157
KL3-28	Opx	Keluo	Zhang et al. (2011)	54.9697	0.109333	4.22333	0.332333	6.516	0.158667	32.8967	0.371	0.161	0.0396667	0.08	99.8577	89.9994
KL3-30	Opx	Keluo	Zhang et al. (2011)	56.465	0.056	1.905	0.443667	5.94833	0.138667	33.825	0.525	0.09	0.01	0.075	99.4817	91.0205
KL3-31	Opx	Keluo	Zhang et al. (2011)	55.4469	0.120785	3.63218	0.386715	6.09761	0.140577	33.1814	0.65772	0.04263	0.00203	0.0908425	99.7994	90.6543
KL3-38	Opx	Keluo	Zhang et al. (2011)	55.2198	0.0915	3.337	0.4035	6.24325	0.14975	33.2058	0.4395	0.0355	0.00625	0.06725	99.199	90.4587
KL3-40	Opx	Keluo	Zhang et al. (2011)	57.2577	0.0686667	1.87667	0.452667	5.42233	0.0953333	34.4097	0.436667	0.0346667	0.0173333	0.083	100.155	91.8778
KL3-41	Opx	Keluo	Zhang et al. (2011)	55.609	0.099	3.732	0.3035	6.04	0.123	33.2135	0.413	0.0585	0.005	0.0685	99.665	90.7426
KL3-49	Opx	Keluo	Zhang et al. (2011)	56.2585	0.074	2.7655	0.5045	5.495	0.1545	34.128	0.4605	0.068	0	0.0715	99.98	91.7157
KL3-53	Opx	Keluo	Zhang et al. (2011)	56.1452	0.02125	2.44475	0.48875	5.9565	0.14875	33.6658	0.55	0.01625	0.008	0.0675	99.5127	90.9705
KL3-56	Opx	Keluo	Zhang et al. (2011)	54.9265	0.13225	3.75625	0.2995	6.478	0.1435	32.6373	0.518	0.056	0.00325	0.05725	99.0078	89.9808
08KL-01	Opx	Keluo	Zhang et al. (2011)	56.5352	0.09425	3.265	0.34925	6.537	0.1425	33.2912	0.357	0.03625	0.0005	0.07725	100.685	90.0775
08KL-02	Opx	Keluo	Zhang et al. (2011)	56.9178	0.116	2.0884	0.5236	5.5844	0.1364	34.0058	0.8646	0.0508	0.0096	0.0432	100.341	91.5645
08KL-03	Opx	Keluo	Zhang et al. (2011)	54.7393	0.170333	4.36067	0.335333	6.73433	0.122333	31.92	1.05567	0.0813333	0.01	0.09	99.6193	89.417
08KL-04	Opx	Keluo	Zhang et al. (2011)	55.117	0.1105	3.928	0.24425	6.78225	0.1695	32.7463	0.4585	0.01475	0.002	0.0365	99.6095	89.5905
08KL-05	Opx	Keluo	Zhang et al. (2011)	55.8337	0.0666667	3.32933	0.386333	6.48567	0.117667	33.2697	0.376667	0.0223333	0	0.097	99.985	90.142
08KL-07		Keluo	Zhang et al. (2011)
08KL-09	Opx	Keluo	Zhang et al. (2011)	54.0383	0.087	4.26	0.246333	7.41433	0.175	32.193	0.287	0.0323333	0.00333333	0.109	98.8457	88.5581
08KL-10	Opx	Keluo	Zhang et al. (2011)	54.3983	0.150333	4.404	0.333	6.91033	0.137333	32.5773	0.476	0.0286667	0.00966667	0.0656667	99.4907	89.3656
08KL-11	Opx	Keluo	Zhang et al. (2011)	56.139	0.2105	2.268	0.50975	5.688	0.1605	33.8563	0.5785	0.0365	0.00425	0.098	99.5493	91.3868
08KL-12	Opx	Keluo	Zhang et al. (2011)	55.7237	0.065	3.18467	0.336333	6.63433	0.0906667	33.2443	0.251333	0.011	0	0.0296667	99.571	89.9318
08KL-13	Opx	Keluo	Zhang et al. (2011)	56.3783	0.10725	2.113	0.44025	6.081	0.1115	33.8855	0.39025	0.02575	0.00275	0.03775	99.5733	90.8534
09NMB33	Opx	Nuomin	Hao et al. (2016)	55.67	0.14	2.58	0.61	5.87	0.12	33.55	0.89	0.08	0.01	0.12	99.64	91.062
09NMB36	Opx	Nuomin	Hao et al. (2016)	55.07	0.32	3.71	0.58	5.84	0.12	33.24	0.8	0.07	0	0.1	99.85	91.0281
09NMB37	Opx	Nuomin	Hao et al. (2016)	56.12	0.07	2.63	0.67	5.52	0.1	33.99	0.82	0.07	0.01	0.06	100.06	91.6501
09NMB38	Opx	Nuomin	Hao et al. (2016)	56.27	0.01	1.87	0.62	5.23	0.12	34.3	0.95	0.03	0.01	0.09	99.5	92.1201
09NMB40	Opx	Nuomin	Hao et al. (2016)	55.13	0.19	3.23	0.71	5.84	0.12	33.42	0.92	0.08	0	0.1	99.74	91.0721
09NMB41	Opx	Nuomin	Hao et al. (2016)	55.45	0.03	3.62	0.64	5.64	0.09	33.56	0.78	0.05	0.01	0.1	99.97	91.3844
09NMB42	Opx	Nuomin	Hao et al. (2016)	56.72	0.02	2.1	0.64	5.16	0.07	34.27	0.9	0.04	0	0.09	100.01	92.2111
09NMB49	Opx	Nuomin	Hao et al. (2016)	54.84	0.09	4	0.56	5.75	0.1	32.89	0.81	0.05	0	0.04	99.13	91.0684
NM2-01	Opx	Nuomin	Zhang et al. (2019)	55.02	0.07	3.26	0.6	5.58	0.14	32.86	0.95	0.09	0.02	0.1	98.7	91.3023
NM2-02	Opx	Nuomin	Zhang et al. (2019)	55.74	0.06	3.36	0.63	5.61	0.13	33.39	0.84	0.05	0.01	0.09	99.9	91.3864
NM2-04	Opx	Nuomin	Zhang et al. (2019)	55.21	0.2	3.72	0.77	5.75	0.13	32.97	1	0.1		0.1	99.97	91.0881
NM2-07	Opx	Nuomin	Zhang et al. (2019)	55.16	0.35	3.8	0.76	6.44	0.17	32.48	0.95	0.13		0.13	100.36	89.9903
NM2-20	Opx	Nuomin	Zhang et al. (2019)	55.32	0.11	4.25	0.34	6.49	0.13	32.76	0.46	0.05		0.05	99.96	89.9979
NM2-23	Opx	Nuomin	Zhang et al. (2019)	55.76	0.06	3.2	0.71	5.41	0.14	33.43	0.97	0.07		0.11	99.86	91.677
NM2-24	Opx	Nuomin	Zhang et al. (2019)	55.66	0.04	3.22	0.66	5.22	0.12	33.24	0.92	0.09	0.01	0.1	99.29	91.9035
NM2-27	Opx	Nuomin	Zhang et al. (2019)	54.64	0.28	4.07	0.55	6.33	0.11	32.67	0.8	0.1		0.14	99.7	90.1961
NM2-29	Opx	Nuomin	Zhang et al. (2019)	54.91	0.25	3.77	0.7	6.08	0.11	32.49	0.93	0.13		0.09	99.46	90.4993
NM2-34	Opx	Nuomin	Zhang et al. (2019)	55.6	0.02	3.26	0.76	5.2	0.14	33.35	1	0.07		0.11	99.53	91.9565
NM2-37	Opx	Nuomin	Zhang et al. (2019)	55.39	0.17	3.95	0.59	5.79	0.14	32.79	0.89	0.07	0.01	0.08	99.87	90.9869
NM2-39	Opx	Nuomin	Zhang et al. (2019)	55.32	0.14	4.27	0.32	6.32	0.14	32.85	0.35	0.07	0.01	0.08	99.88	90.2585
NM2-48	Opx	Nuomin	Zhang et al. (2019)	54.9	0.07	3.74	0.67	5.44	0.12	32.88	0.95	0.1		0.08	98.97	91.5067
NM2-50	Opx	Nuomin	Zhang et al. (2019)	55.88	0.05	3.66	0.62	5.18	0.13	33.63	0.9	0.11		0.08	100.25	92.0463
NM2-51	Opx	Nuomin	Zhang et al. (2019)	55.18	0.1	3.65	0.66	5.65	0.15	32.89	0.86	0.1		0.13	99.36	91.2101
NM2-55	Opx	Nuomin	Zhang et al. (2019)	54.82	0.12	3.68	0.36	6.1	0.14	32.62	0.53	0.04	0.01	0.07	98.49	90.5054
NM2-56	Opx	Nuomin	Zhang et al. (2019)	55.28	0.01	3.47	0.69	5.39	0.14	32.88	1.04	0.04		0.1	99.03	91.5782
BLS01A		Nuomin	Tian et al. (2020)
BLS02A		Nuomin	Tian et al. (2020)
BLS02B		Nuomin	Tian et al. (2020)
BLS03	Opx	Nuomin	Tian et al. (2020)	55.8967	0.0625	3.13222	0.638889	5.82889	0.138889	32.9856	0.79	0.0455556	0.005	0.11375	99.6379	90.9808
BLS06B	Opx	Nuomin	Tian et al. (2020)	56.3186	0.101429	2.89	0.75	5.9	0.138571	32.7443	0.945714	0.08	0.01	0.16	100.039	90.8198
BLS07		Nuomin	Tian et al. (2020)
BLS09	Opx	Nuomin	Tian et al. (2020)	55.55	0.075	3.135	0.68	6.105	0.1825	33.42	0.8425	0.09	0.01	0.15	100.24	90.7046
BLS10	Opx	Nuomin	Tian et al. (2020)	55.618	0.094	3.647	0.583	5.883	0.134	33.388	0.75	0.087	0.00833333	0.118	100.31	91.0044
BLS12A		Nuomin	Tian et al. (2020)
BLS16		Nuomin	Tian et al. (2020)
BLS18		Nuomin	Tian et al. (2020)
BLS19	Opx	Nuomin	Tian et al. (2020)	56.4233	0.095	3.44333	0.696667	5.90333	0.11	32.63	0.926667	0.08	0.01	0.15	100.468	90.7858
BLS20		Nuomin	Tian et al. (2020)
BLS21	Opx	Nuomin	Tian et al. (2020)	56.3033	0.14	3.52	0.543333	6.41	0.156667	33.2133	0.76	0.0966667	0.015	0.16	101.318	90.2308
BLS24		Nuomin	Tian et al. (2020)
BLS25		Nuomin	Tian et al. (2020)
BLS27	Opx	Nuomin	Tian et al. (2020)	56.0617	0.26	3.45667	0.685	6.83167	0.156667	31.7217	0.866667	0.136667	0.026	0.146667	100.349	89.2206
BLS29	Opx	Nuomin	Tian et al. (2020)	55.52	0.09	3.29	0.77	6.12	0.16	32.38	0.9	0.16	0.01	0.11	99.51	90.4134
BLS30	Opx	Nuomin	Tian et al. (2020)	55.85	0.272857	3.08	0.605714	6.32857	0.15	32.0114	0.914286	0.195714	0.126667	0.142857	99.6781	90.0166
BLS31	Opx	Nuomin	Tian et al. (2020)	54.895	0.26	3.86125	0.5375	7.60375	0.1425	31.8163	0.8375	0.10625	0.01	0.13875	100.209	88.1779
BLS33		Nuomin	Tian et al. (2020)
BLS34	Opx	Nuomin	Tian et al. (2020)	56.1267	0.03	2.91	0.763333	5.37	0.143333	33.1533	1.00667	0.0766667	0.02	0.14	99.74	91.6702
BLS35A	Opx	Nuomin	Tian et al. (2020)	57.244	0.0725	1.952	0.694	5.61	0.154	33.308	0.808	0.054	0.0133333	0.142	100.052	91.367
BLS38A	Opx	Nuomin	Tian et al. (2020)	56.53	0.06	3.46	0.675	5.92	0.16	32.975	0.89	0.09	0.01	0.15	100.92	90.85
BLS39A		Nuomin	Tian et al. (2020)
BLS40	Opx	Nuomin	Tian et al. (2020)	55.804	0.19	3.18	0.55	6.814	0.136	32.55	0.852	0.15	0.015	0.126	100.367	89.4904
NMH01	Opx	Nuomin	Tian et al. (2020)	55.0825	0.25	3.43125	0.65125	6.7175	0.14125	32.6388	0.88625	0.13125	0.012	0.11625	100.058	89.6491
NMH03	Opx	Nuomin	Tian et al. (2020)	55.18	0.196667	3.16667	0.496667	6.34667	0.116667	32.52	0.853333	0.166667	0.02	0.13	99.1933	90.1319
NMH04	Opx	Nuomin	Tian et al. (2020)	55.24	0.145	3.1975	0.565	6.2125	0.1725	33.1225	0.895	0.12		0.095	99.765	90.4797
NMH06	Opx	Nuomin	Tian et al. (2020)	56.034	0.098	3.132	0.734	6.334	0.168	32.83	0.956	0.092	0.01	0.18	100.568	90.2336
NMH09	Opx	Nuomin	Tian et al. (2020)	56.255	0.1475	2.9575	0.62	6.48	0.175	32.975	0.75	0.11	0.0133333	0.1	100.583	90.0704
XSFS01		Nuomin	Tian et al. (2020)
XSFS06		Nuomin	Tian et al. (2020)
XSFS07	Opx	Nuomin	Tian et al. (2020)	56.8933	0.02	2.20667	0.606667	5.82333	0.163333	33.5367	0.593333	0.0366667		0.065	99.945	91.1235
CH01-01	Opx	Halaha	Zhang (2011)	54.84	0.09	4.9	1.1	5.64	0.14	31.76	1.83	0.05	0.01	0.09	100.45	90.9403
CH01-02	Opx	Halaha	Zhang (2011)	55.52	0.33	4.64	0.63	7.28	0.06	30.95	1.29	0.22	0.01	0.08	101.01	88.3427
CH01-04	Opx	Halaha	Zhang (2011)	58.02	0.04	1.23	0.8	5.08	0.1	34.29	1.03	0.05	0.01	0.09	100.74	92.3267
CH01-05	Opx	Halaha	Zhang (2011)	54.9	0.22	4.16	0.66	6.3	0.09	32.09	1.15	0.13	0.01	0.11	99.82	90.0791
CH01-07	Opx	Halaha	Zhang (2011)	55.14	0.11	3.98	0.47	6.22	0.16	33.16	0.43	0.04	0	0.08	99.79	90.479
CH01-08	Opx	Halaha	Zhang (2011)	54.98	0.06	4.41	1.17	5.63	0.1	31.83	1.73	0.09	0.01	0.15	100.16	90.973
CH01-09	Opx	Halaha	Zhang (2011)	56.5	0.09	3.32	0.4	6.2	0.15	33.51	0.42	0.04	0.01	0.06	100.7	90.5966
CH01-10	Opx	Halaha	Zhang (2011)	54.3	0	4.83	1.04	5.62	0.1	31.79	1.79	0.11	0.02	0.08	99.68	90.9773
CH01-11	Opx	Halaha	Zhang (2011)	55.97	0.04	3.3	1.25	5.59	0.14	33.24	0.88	0.07	0.01	0.14	100.63	91.3791
CH02-01	Opx	Halaha	Zhang (2011)	55.45	0.09	3.06	0.9	5.72	0.15	32.84	1.14	0.4	0.02	0.14	99.91	91.0985
CH02-04	Opx	Halaha	Zhang (2011)	54.71	0.13	4.15	1.08	6.05	0.13	31.97	1.71	0.13	0.02	0.13	100.21	90.4026
CH02-05	Opx	Halaha	Zhang (2011)	54.35	0.11	4.9	0.97	5.77	0.18	31.8	1.72	0.15	0	0.16	100.11	90.7614
03CH-01	Opx	Halaha	Zhang (2011)	54.65	0.09	5	0.9	5.7	0.12	31.11	1.78	0.23	0	0.07	99.65	90.6795
03CH-02	Opx	Halaha	Zhang (2011)	55.04	0.11	5.1	0.75	5.99	0.14	31.43	1.79	0.21	0.02	0.14	100.72	90.3411
03CH-03	Opx	Halaha	Zhang (2011)	55.05	0.14	4.95	0.68	6.21	0.13	31.24	1.71	0.17	0.01	0.12	100.41	89.9672
03CH-04	Opx	Halaha	Zhang (2011)	54.6	0.08	4.86	0.95	5.49	0.11	31.58	1.9	0.14	0.01	0.1	99.82	91.1141
03CH-05	Opx	Halaha	Zhang (2011)	55.72	0.13	3.76	0.42	5.86	0.17	33.13	0.42	0.05	0.01	0.07	99.74	90.9729
03CH-06	Opx	Halaha	Zhang (2011)	54.34	0.15	5.05	0.83	5.72	0.11	31.29	1.78	0.22	0.03	0.11	99.63	90.6986
03CH-07	Opx	Halaha	Zhang (2011)	54.49	0.1	3.47	1.15	5.64	0.1	32.2	1.59	0.14	0	0.11	98.99	91.053
03CH-08	Opx	Halaha	Zhang (2011)	54.77	0.13	4.32	1.09	5.61	0.13	31.64	1.59	0.11	0.01	0.14	99.54	90.9531
03CH-10	Opx	Halaha	Zhang (2011)	56.61	0.07	2.77	0.83	4.8	0.15	33.93	1.08	0.11	0.01	0.12	100.48	92.6473
03CH-13	Opx	Halaha	Zhang (2011)	55.51	0.05	3.65	1.09	5.4	0.15	32.34	1.5	0.19	0.01	0.12	100.01	91.4351
03CH-15	Opx	Halaha	Zhang (2011)	54.09	0.17	4.8	0.89	5.97	0.12	31.58	1.93	0.17	0	0.13	99.85	90.4116
GW04226	Opx	Halaha	Zhang (2011)	55.88	0.11	3.94	0.27	6.67	0.17	32.44	0.42	0.05	0	0.11	100.06	89.6583
GW04227	Opx	Halaha	Zhang (2011)	54.04	0.2	5.54	0.66	6.19	0.14	31.49	1.56	0.24	0	0.17	100.23	90.0678
GW04229	Opx	Halaha	Zhang (2011)	54.69	0.19	5.36	0.66	6.13	0.13	30.98	1.51	0.25	0.01	0.12	100.03	90.0087
GW04240	Opx	Halaha	Zhang (2011)	50.15	0.1	11.13	2.05	5.89	0.3	27.75	2.25	0.07	0.01	0.02	99.72	89.3597
07DLH04	Opx	Halaha	Zhao & Fan (2011)	57.8	0.01	1	0.67	4.77	0.12	34.58	0.72	0.03	0.01	0.13	99.85	92.8174
07DLH05	Opx	Halaha	Zhao & Fan (2011)	55.2	0.01	3.73	1.12	5.36	0.12	32.21	1.5	0.1	0.01	0.16	99.53	91.4617
07HXD01	Opx	Halaha	Zhao & Fan (2011)	53.49	0	3.12	1.17	5.37	0.1	31.95	1.93	0.1	0.02	0.11	97.35	91.3835
07HXD03	Opx	Halaha	Zhao & Fan (2011)	55.84	0.05	4.27	1.13	5.41	0.15	32.7	1.43	0.25	0	0.12	101.34	91.507
07HXD05	Opx	Halaha	Zhao & Fan (2011)	57.41	0.01	1.04	0.78	5.01	0.15	34.06	1.16	0.04	0.02	0.11	99.79	92.3772
07TFL01	Opx	Halaha	Zhao & Fan (2011)	53.05	0.22	4.56	0.68	9.22	0.16	29.9	1.26	0.25	0	0.09	99.39	85.2523
07TFL03	Opx	Halaha	Zhao & Fan (2011)	56.68	0	1.25	0.38	5.04	0.15	34.66	0.46	0.02	0	0.08	98.71	92.4577
08TFL02	Opx	Halaha	Zhao & Fan (2011)	55.74	0.17	3.06	0.57	5.66	0.12	33.59	0.75	0.05	0	0.06	99.75	91.3635
08TFL07	Opx	Halaha	Zhao & Fan (2011)	56.51	0.03	1.57	0.48	5.07	0.17	33.76	0.71	0.02	0	0.15	98.46	92.2298
07WNP01	Opx	Halaha	Zhao & Fan (2011)	54.28	0.09	4.86	0.57	5.69	0.12	32.01	0.93	0.26	0.02	0.08	98.9	90.9322
07WNP07	Opx	Halaha	Zhao & Fan (2011)	54.49	0.02	4.42	1.05	5.98	0.1	32.4	1.66	0.06	0	0.02	100.21	90.6174
07TFL04	Opx	Halaha	Zhao & Fan (2011)	54.69	0.11	3.86	0.27	6.52	0.16	32.72	0.4	0.04	0.02	0.08	98.87	89.9453
07TFL06	Opx	Halaha	Zhao & Fan (2011)	54.25	0.08	3.88	0.42	5.89	0.13	32.61	0.51	0.1	0	0.09	97.94	90.7996
07DCH01	Opx	Halaha	Zhao & Fan (2011)	56.42	0.12	3.5	0.21	6.28	0.14	33.37	0.39	0.04	0	0.09	100.56	90.4507
07DCH02	Opx	Halaha	Zhao & Fan (2011)	55.01	0.13	4.09	0.34	6.21	0.19	32.99	0.38	0.07	0	0.11	99.51	90.4486
08WNP08	Opx	Halaha	Zhao & Fan (2011)	53.59	0.1	4.6	0.99	5.88	0.12	31.55	1.75	0.03	0.01	0.12	98.73	90.5344
08TFL06	Opx	Halaha	Zhao & Fan (2011)	54.18	0.11	4.52	0.29	6.57	0.14	32.22	0.44	0.03	0	0.1	98.59	89.735
TFL-04	Opx	Halaha	Liu (2014)	55.66	0.09	3.14	0.54	5.41	0.08	33.28	0.38	0.08			98.66	91.6426
TFL-07	Opx	Halaha	Liu (2014)	55.94	0.09	2.43	0.59	5.11	0.11	34.28	0.63	0.06			99.24	92.2828
0098-10-1	Opx	Halaha	Liu (2014)	54.34	0.23	4.28	0.74	5.83	0.14	31.93	1.62	0.23			99.34	90.7087
0098-10	Opx	Halaha	Liu (2014)	56.15	0.12	2.88	0.39	5.76	0.15	34.37	0.42	0.05	0.01		100.3	91.4064
0098-13	Opx	Halaha	Liu (2014)	51.16		3.95	1.15	7.27	0.11	33.38	1.71	0.09			98.82	89.1121
0098-19	Opx	Halaha	Liu (2014)	56.12		2.68	0.52	5.77	0.1	34	0.6	0.05			99.84	91.3072
TXT-04	Opx	Halaha	Liu (2014)	55.44	0.08	3.33	0.56	5.81	0.14	33.17	1.03	0.31			99.87	91.0529
TFL-08	Opx	Halaha	Liu (2014)	56.06	0.08	2.97	0.42	6.32	0.12	34.27	0.44	0.12			100.8	90.6243
0098-06	Opx	Halaha	Liu (2014)	54.83	0.11	4	0.25	6.65	0.11	32.72	0.4	0.02			99.09	89.7653
0098-15	Opx	Halaha	Liu (2014)	56.13	0.11	4.36	0.26	6.52	0.15	31.81	0.98	0.09			100.41	89.6873
0098-17	Opx	Halaha	Liu (2014)	53.74	0.15	4.48	0.31	6.97	0.16	32.7	0.32	0.11			98.94	89.3196
TXT-02	Opx	Halaha	Liu (2014)	55.22	0.22	3.29	0.63	5.8	0.05	33.74	0.89	0.2			100.04	91.2046
AS01	Opx	Halaha	Pan et al. (2015)	55.6474	0.0804	4.0774	0.2822	6.5734	0.1154	32.5676	0.4206	0.048	0.0096	0.087	99.9096	89.8287
AS02	Opx	Halaha	Pan et al. (2015)	55.9475	0.078	3.41175	0.48375	5.75125	0.1105	33.1825	0.43175	0.037	0.00375	0.10125	99.5387	91.1384
AS03	Opx	Halaha	Pan et al. (2015)	55.692	0.10475	3.99	0.47425	6.04525	0.0895	32.3088	0.9295	0.1565	0.00375	0.05625	99.851	90.5005
AS04	Opx	Halaha	Pan et al. (2015)	54.9135	0.1685	4.899	0.634	6.025	0.0705	32.15	1.084	0.1615	0.003	0.1025	100.212	90.487
AS05	Opx	Halaha	Pan et al. (2015)	54.7705	0.21525	4.86075	0.61575	5.932	0.09025	31.8755	1.17675	0.15175	0.00175	0.10175	99.7927	90.5469
AS07	Opx	Halaha	Pan et al. (2015)	55.8154	0.0612	2.9416	1.124	5.5304	0.0788	32.2636	1.9794	0.0526	0.0048	0.1234	99.9752	91.2274
DHG01	Opx	Halaha	Pan et al. (2015)	54.8593	0.208333	4.016	0.577667	7.13	0.0893333	31.702	0.892667	0.115667	0.00333333	0.123333	99.7163	88.7964
DHG02	Opx	Halaha	Pan et al. (2015)	54.7507	0.22675	4.0885	0.57425	7.17325	0.081	31.5212	0.9335	0.14	0.00175	0.10775	99.599	88.6789
DHG04	Opx	Halaha	Pan et al. (2015)	54.5922	0.1404	5.1528	0.6874	6.1092	0.1044	31.254	1.518	0.2082	0.0088	0.1	99.8754	90.1179
DHG09	Opx	Halaha	Pan et al. (2015)	56.6043	0.022	2.645	0.566	5.633	0.088	33.3667	0.61875	0.04	0.00875	0.10675	99.6992	91.3486
DHG11	Opx	Halaha	Pan et al. (2015)	56.757	0.168	1.908	0.9545	5.3975	0.0865	33.082	1.3405	0.1365	0.0115	0.1195	99.9615	91.6146
DHG12	Opx	Halaha	Pan et al. (2015)	54.8445	0.06525	4.22225	1.08175	5.6245	0.084	31.7145	1.65	0.12425	0.00225	0.12825	99.5405	90.9512
DHG13	Opx	Halaha	Pan et al. (2015)	54.9018	0.057	4.245	1.16975	5.596	0.0885	31.8005	1.65575	0.11825	0.0015	0.08325	99.7182	91.0151
DHG05	Opx	Halaha	Pan et al. (2015)	55.3765	0.039	3.544	1.1405	5.3965	0.1135	32.261	1.6345	0.055	0.003	0.102	99.666	91.421
DHG14	Opx	Halaha	Pan et al. (2015)	54.7403	0.01925	4.467	1.1345	5.57075	0.1015	31.6335	1.88825	0.05475	0.012	0.11275	99.7345	91.009
A2-2	Opx	Abaga	Zhang et al. (2012)	55.7	0.07	4.11	0.42	6.35	0.14	32.8	0.43	0.04		0.1	100.16	90.2033
A2-1	Opx	Abaga	Zhang et al. (2012)	54.9	0.03	2.72	0.5	6.62	0.13	34.8	0.7	0.02		0.14	100.56	90.3573
A2-10	Opx	Abaga	Zhang et al. (2012)	55.9	0.1	4.08	0.34	6.49	0.14	33	0.43	0.06		0.11	100.65	90.0634
A2-11	Opx	Abaga	Zhang et al. (2012)	55.9	0.12	3.96	0.38	6.47	0.15	32.8	0.45	0.07		0.09	100.39	90.0366
ABG08	Opx	Abaga	Zhang et al. (2012)	54.8	0.16	4.38	0.47	6.02	0.13	29.7	3.44	0.35		0.06	99.51	89.79
ABG05-1	Opx	Abaga	Zhang et al. (2012)	56.3	0.04	3.25	0.53	6.29	0.12	33.3	0.49	0.02		0.07	100.41	90.4187
ABG06-1	Opx	Abaga	Zhang et al. (2012)	56.1	0.02	3.62	0.48	6.51	0.14	32.9	0.52	0.04		0.08	100.41	90.0086
ABG07-1	Opx	Abaga	Zhang et al. (2012)	56.2	0.02	3.43	0.8	6.24	0.12	32.8	1.17	0.03		0.08	100.89	90.3566
XLHT1	Opx	Abaga	Pan et al. (2013)	55.7	0.14	3.17	0.72	5.79	0.13	33.1	0.97	0.16	0.01		99.89	91.0638
XLHT2a	Opx	Abaga	Pan et al. (2013)	55.7	0.05	3.56	0.72	5.83	0.14	33.1	1.01	0.09	0.01		100.21	91.0076
XLHT2b	Opx	Abaga	Pan et al. (2013)	54.8	0.03	3.31	0.66	5.4	0.1	32.3	1	0.1	0.01		97.71	91.4254
XLHT3	Opx	Abaga	Pan et al. (2013)	54.9	0.2	4.2	0.64	6.89	0.12	31.8	0.9	0.23	0.01		99.89	89.1624
XLHT4	Opx	Abaga	Pan et al. (2013)	54.1	0.19	5.47	0.43	7.08	0.16	31.2	0.96	0.16	0		99.75	88.7073
XLHT9	Opx	Abaga	Pan et al. (2013)	56.4	0.1	2.9	0.79	6	0.14	32.8	0.93	0.21	0		100.27	90.693
XLHT10	Opx	Abaga	Pan et al. (2013)	56.6	0.01	2.44	0.63	5.57	0.15	33.4	0.99	0.04	0		99.83	91.4449
XLHT11	Opx	Abaga	Pan et al. (2013)	56.4	0.02	2.51	0.7	5.66	0.14	33.5	0.98	0.05	0		99.96	91.3423
XLHT12	Opx	Abaga	Pan et al. (2013)	54.5	0.28	4.82	0.58	7	0.13	31.2	0.97	0.22	0		99.7	88.8207
XLHT13	Opx	Abaga	Pan et al. (2013)	55.7	0.08	3.17	0.67	5.67	0.14	32.5	0.96	0.18	0		99.07	91.0853
XLHT14	Opx	Abaga	Pan et al. (2013)	56	0.09	3.78	0.46	6.11	0.13	33.1	0.39	0.04	0		100.1	90.6162
XLHT15	Opx	Abaga	Pan et al. (2013)	56.3	0.04	3.13	0.69	5.89	0.13	32.9	1.04	0.13	0		100.25	90.8733
XLHT17	Opx	Abaga	Pan et al. (2013)	55.5	0.08	4.26	0.39	6.37	0.15	32.9	0.43	0.06	0		100.14	90.2024
XLHT18	Opx	Abaga	Pan et al. (2013)	56	0.06	3.39	0.38	6.41	0.12	33.3	0.35	0.02	0		100.03	90.2538
XLHT19	Opx	Abaga	Pan et al. (2013)	55.41	0.07	4.2	0.64	5.87	0.11	32.84	0.59	0.08			99.82	90.8864
XLHT20	Opx	Abaga	Pan et al. (2013)	55.5	0.11	3.95	0.33	6.36	0.16	32.9	0.42	0.05	0.01		99.79	90.2163
XLHT22	Opx	Abaga	Pan et al. (2013)	55.4	0.09	3.55	0.41	6.05	0.12	33.2	0.47	0.04	0		99.33	90.7252
southeastern NEC
BLS-1	Opx	Shuangliao	Yu et al. (2009)	55.15	0.12	3.94	0.27	6.52	0.15	33.95	0.63	0.1		0.12	100.95	90.2741
BLS-2	Opx	Shuangliao	Yu et al. (2009)	56.13	0.03	1.93	0.56	5.34	0.14	35.37	0.67	0.13		0.1	100.4	92.1917
BLS-3	Opx	Shuangliao	Yu et al. (2009)	54.77	0.13	3.94	0.33	6.4	0.14	33.97	0.69	0.11		0.12	100.6	90.4411
BLS-5	Opx	Shuangliao	Yu et al. (2009)	53.99	0.14	4.82	0.36	6.47	0.15	33.45	0.94	0.15		0.13	100.6	90.2113
BLS-6	Opx	Shuangliao	Yu et al. (2009)	55.94	0.03	2.42	0.49	5.47	0.13	34.93	0.71	0.05		0.13	100.3	91.9244
NBS-1	Opx	Shuangliao	Yu et al. (2009)	55.45	0.14	3.28	0.23	6.37	0.14	34.72	0.41	0.04		0.13	100.91	90.6681
BBT-1	Opx	Shuangliao	Yu et al. (2009)	54.95	0.08	4.07	0.58	6.26	0.15	33.72	1.11	0.07		0.14	101.13	90.5677
BBT-2	Opx	Shuangliao	Yu et al. (2009)	55.95	0.04	2.13	0.43	5.41	0.14	35.14	0.42	0.04		0.12	99.82	92.0498
BBT-4	Opx	Shuangliao	Yu et al. (2009)	56.23	0.02	2.17	0.44	5.59	0.14	35.21	0.5	0.06		0.09	100.45	91.8219
BBT-5	Opx	Shuangliao	Yu et al. (2009)	56.43	0.04	1.91	0.35	5.64	0.14	35.67	0.4	0.03		0.07	100.68	91.8525
BBT-6	Opx	Shuangliao	Yu et al. (2009)	55.2	0.05	3.21	0.73	5.53	0.14	33.96	1.05	0.1		0.11	100.08	91.6295
BBT-7	Opx	Shuangliao	Yu et al. (2009)	55.03	0.06	3.46	0.6	5.75	0.12	33.92	1	0.09		0.13	100.16	91.3161
BBT-8	Opx	Shuangliao	Yu et al. (2009)	53.91	0.18	5.1	0.46	6.24	0.15	32.56	1.15	0.18		0.13	100.06	90.2925
BBT-9	Opx	Shuangliao	Yu et al. (2009)	55.97	0.07	2.06	0.7	5.31	0.14	34.74	1.07	0.08		0.13	100.27	92.1024
BBT-10	Opx	Shuangliao	Yu et al. (2009)	55.19	0.09	3.4	0.81	5.25	0.13	34.28	1.07	0.1		0.1	100.42	92.0881
BBT-11	Opx	Shuangliao	Yu et al. (2009)	54.27	0.09	3.68	0.66	5.85	0.15	33.7	1.14	0.08		0.08	99.7	91.1259
BBT1-5	Opx	Shuangliao	Hao et al. (2016)	54.98	0.54	3.87	0.74	5.5	0.15	33.57	0.96	0.15	0	0.07	100.53	91.5825
BBT1-06	Opx	Shuangliao	Hao et al. (2016)	54.64	0.04	4.08	0.66	5.39	0.13	33.87	0.93	0.13	0.01	0.05	99.93	91.8042
BBT2-4	Opx	Shuangliao	Hao et al. (2016)	54.28	0.11	3.63	0.63	5.48	0.13	33.77	0.92	0.08	0.01	0.07	99.11	91.6561
BBT2-14	Opx	Shuangliao	Hao et al. (2016)	54.13	0.11	2.99	0.67	5.83	0.14	33.98	0.86	0.33	0.01	0.05	99.1	91.22
BL2-10	Opx	Shuangliao	Hao et al. (2016)	53.77	0.06	4.18	0.36	6.07	0.15	33.98	0.61	0.1	0.01	0.02	99.31	90.8915
17SL1-1	Opx	Shuangliao	Guo et al. (2020)	55.89	0.1	3.8	0.36	6.01	0.16	33.11	0.62	0.09	0	0.12	100.26	90.7582
17SL1-2	Opx	Shuangliao	Guo et al. (2020)	55.05	0.13	4.82	0.43	6.03	0.14	32.04	0.91	0.15		0.09	99.79	90.4502
17SL1-7	Opx	Shuangliao	Guo et al. (2020)	56.1	0.14	2.86	0.56	5.32	0.14	33.47	0.77	0.11	0.02	0.1	99.59	91.8131
17SL1-8	Opx	Shuangliao	Guo et al. (2020)	56.62	0.03	2.53	0.62	5.55	0.14	33.74	0.9	0.04	0	0.12	100.29	91.5517
17SL1-16	Opx	Shuangliao	Guo et al. (2020)	55.75	0.05	3.76	0.28	6.43	0.16	32.83	0.43	0.04	0.02	0.03	99.78	90.1003
17SL1-18	Opx	Shuangliao	Guo et al. (2020)	56.11	0.09	3.56	0.27	6.12	0.17	32.9	0.46	0.19	0.07	0.04	99.98	90.5506
17SL1-20	Opx	Shuangliao	Guo et al. (2020)	56.28	0.11	2.54	0.47	5.8	0.17	33.27	0.69	0.05	0.01	0.08	99.47	91.0914
17SL1-23	Opx	Shuangliao	Guo et al. (2020)	56	0.03	3.55	0.45	5.78	0.15	33.2	0.63	0.05	0.01	0.13	99.98	91.1023
17SL2-3	Opx	Shuangliao	Guo et al. (2020)	55.93	0.03	3.53	0.29	5.98	0.14	33.19	0.44	0.08	0.03	0.11	99.75	90.8202
17SL2-6	Opx	Shuangliao	Guo et al. (2020)	55.72	0.05	3.91	0.22	6.67	0.15	32.82	0.43	0.08	0	0.1	100.15	89.7658
17SL2-7	Opx	Shuangliao	Guo et al. (2020)	55.45	0.16	4.09	0.33	6.39	0.16	32.84	0.47	0.08	0.01	0.1	100.08	90.1585
17SL3-15	Opx	Shuangliao	Guo et al. (2020)	55.04	0.1	4.29	0.7	5.06	0.12	33.25	0.96	0.14	0		99.66	92.1343
17SL3-16	Opx	Shuangliao	Guo et al. (2020)	56.51	0.09	2.53	0.81	4.81	0.12	33.62	1.08	0.15	0.01	0.07	99.8	92.5702
l-14	Opx	Yitong	Xu et al. (1993)	55.19	0.1	4.08	0.31	6.35	0.19	32.75	0.71	0.09			99.77	90.1898
l-44	Opx	Yitong	Xu et al. (1993)	54.8	0.11	4.17	0.41	5.96	0.14	33	0.72	0.13			99.44	90.8002
2-07	Opx	Yitong	Xu et al. (1993)	55.66	0.04	3.76	0.27	6.43	0.15	33.01	0.48	0.05			99.85	90.1489
2-32	Opx	Yitong	Xu et al. (1993)	55.46	0.11	3.82	0.44	5.89	0.19	33.61	0.69	0.1			100.31	91.0488
3-07	Opx	Yitong	Xu et al. (1993)	57.28	0.07	2.01	0.49	5.72	0.12	34.48	0.66	0.02			100.85	91.4859
3-17	Opx	Yitong	Xu et al. (1993)	54.31	0.07	4.41	0.35	7.35	0.16	31.86	0.75	0.17			99.43	88.5411
l-48	Opx	Yitong	Xu et al. (1993)	54.22	0.12	3.44	0.38	11.4	0.02	28.85	0.81	0.15			99.39	81.8548
l-17	Opx	Yitong	Xu et al. (1993)	52.16	0.21	5.53	0.18	11.4	0.23	28.28	0.86	0.15			99	81.5566
2-12	Opx	Yitong	Xu et al. (1993)	55.76	0.1	3.44	0.25	6.56	0.17	33.33	0.39	0.02			100.02	90.0565
2-31	Opx	Yitong	Xu et al. (1993)	55.79	0.09	3.6	0.48	6.52	0.14	33.59	0.34	0.02			100.57	90.1801
2-51	Opx	Yitong	Xu et al. (1993)	56.46	0.04	2.13	0.15	6.52	0.13	34.17	0.4	0.02			100.02	90.3307
DX91-7	Opx	Yitong	Xu et al. (1993)	56.11	0.08	2.59	0.14	6.64	0.13	33.76	0.34	0.02			99.81	90.0627
DX-06	Opx	Yitong	Zhou et al. (2010)	56.95	0.06	4.12	0.43	5.86	0.16	32.59	0.82	0.1	0.01	0.11	101.21	90.8371
DX-07	Opx	Yitong	Zhou et al. (2010)	56.97	0.07	4.03	0.51	5.55	0.13	33.15	0.82	0.08	0	0.09	101.4	91.4142
DX-08	Opx	Yitong	Zhou et al. (2010)	56.31	0.06	4.54	0.44	6.1	0.16	32.27	0.81	0.15	0.01	0.1	100.95	90.4123
DX-10	Opx	Yitong	Zhou et al. (2010)	57.28	0.08	3.4	0.4	5.88	0.16	33.09	0.68	0.09	0	0.08	101.14	90.935
DX-11	Opx	Yitong	Zhou et al. (2010)	57.6	0.02	3.55	0.4	5.79	0.14	33.6	0.6	0.1	0	0.11	101.91	91.185
08DX-01	Opx	Yitong	Zhou et al. (2010)	55.36	0.12	3.71	0.18	6.27	0.16	32.27	0.63	0.05	0.02	0.09	98.86	90.1713
08DX-02	Opx	Yitong	Zhou et al. (2010)	55.44	0.09	3.83	0.33	6.17	0.14	31.91	0.86	0.09	0.01	0.11	98.98	90.2143
08DX-04	Opx	Yitong	Zhou et al. (2010)	55.04	0.11	4.24	0.2	6.88	0.16	31.66	0.81	0.08	0	0.12	99.3	89.1338
08DX-06	Opx	Yitong	Zhou et al. (2010)	55.55	0.05	3.52	0.24	6.47	0.14	32.13	0.59	0.05	0.01	0.11	98.86	89.8499
08DX-08	Opx	Yitong	Zhou et al. (2010)	55.68	0.08	4.15	0.27	6.42	0.14	32.3	0.77	0.09	0	0.1	100	89.9682
08DX-10	Opx	Yitong	Zhou et al. (2010)	55.57	0.11	4.1	0.1	7.16	0.12	31.69	0.69	0.12	0.01	0.09	99.76	88.7508
08DX-11	Opx	Yitong	Zhou et al. (2010)	54.66	0.11	4.21	0.39	6.26	0.12	31.98	0.76	0.07	0.01	0.1	98.67	90.1053
08DX-12	Opx	Yitong	Zhou et al. (2010)	55.28	0.08	3.73	0.27	6.8	0.16	32.29	0.6	0.08	0.01	0.11	99.41	89.4342
08DX-13	Opx	Yitong	Zhou et al. (2010)	54.5	0.09	3.76	0.27	6.61	0.11	31.99	0.59	0.09	0.01	0.09	98.11	89.6124
08DX-14	Opx	Yitong	Zhou et al. (2010)	54.64	0.13	4.18	0.28	7.26	0.16	31.63	0.67	0.07	0.01	0.09	99.12	88.5925
08DX-15	Opx	Yitong	Zhou et al. (2010)	55.11	0.05	3.84	0.48	6.48	0.15	31.8	0.87	0.08	0	0.12	98.98	89.7412
DX-03	Opx	Yitong	Zhou et al. (2010)	56.41	0.07	3.52	0.33	6.3	0.185	33.1	0.59	0.08	0.01	0.08	100.68	90.3526
DX-09	Opx	Yitong	Zhou et al. (2010)	57.45	0.1	3.71	0.29	6.01	0.17	33.27	0.64	0.06	0.02	0.08	101.8	90.7985
08DX-05	Opx	Yitong	Zhou et al. (2010)	55.21	0.08	4.12	0.26	6.69	0.14	32.01	0.8	0.09	0	0.12	99.52	89.5058
08DX-07	Opx	Yitong	Zhou et al. (2010)	55.65	0.09	3.88	0.15	6.51	0.13	32.16	0.6	0.09	0	0.11	99.37	89.8021
08DX-17	Opx	Yitong	Zhou et al. (2010)	55.84	0.04	3.55	0.45	6.15	0.14	32.57	0.78	0.07	0.01	0.13	99.73	90.4217
08DX-18	Opx	Yitong	Zhou et al. (2010)	54.66	0.05	3.87	0.52	6.3	0.12	32.06	0.87	0.09	0.01	0.12	98.67	90.0707
DX-04	Opx	Yitong	Zhou et al. (2010)	57.1	0.03	2.63	0.21	6.49	0.17	33.76	0.32	0.01	0	0.08	100.8	90.2653
DX-05	Opx	Yitong	Zhou et al. (2010)	58.09	0.07	2.15	0.14	6.63	0.17	33.53	0.29	0.03	0.01	0.09	101.2	90.0149
08DX-03	Opx	Yitong	Zhou et al. (2010)	54.43	0.14	3.96	0.27	9.04	0.14	31.09	0.77	0.08	0.01	0.09	100.02	85.9757
08DX-09	Opx	Yitong	Zhou et al. (2010)	55.51	0	2.77	0.52	6.22	0.12	32.62	0.88	0.03	0.01	0.11	98.79	90.3366
DX-01	Opx	Yitong	Zhou et al. (2010)	57.25	0.03	1.73	0.27	5.46	0.14	33.57	0.73	0.05	0.01	0.07	99.31	91.6386
DX-02	Opx	Yitong	Zhou et al. (2010)	57.2	0.04	1.4	0.19	5.78	0.16	33.81	0.24	0.01	0.01	0.08	98.92	91.2488
08DX-20	Opx	Yitong	Zhou et al. (2010)	57.44	0.03	1.64	0.23	5.4	0.14	33.87	0.43	0.18	0	0.06	99.42	91.7902
08DX-16		Yitong	Zhou et al. (2010)
08DX-19		Yitong	Zhou et al. (2010)
YT-5	Opx	Yitong	Hao et al. (2016)	54.57	0.05	4.14	0.59	5.34	0.12	33.81	0.87	0.1	0.02	0	99.61	91.8608
YT-25	Opx	Yitong	Hao et al. (2016)	55.48	0.12	2.71	0.4	5.8	0.11	33.98	0.5	0.16	0.01	0.03	99.3	91.2613
YT-26	Opx	Yitong	Hao et al. (2016)	55.89	0.06	2.15	0.54	5.77	0.16	34.5	0.66	0.09	0.01	0.02	99.85	91.4224
DSH00-2	Opx	Jiaohe	Zhou et al. (2007)	56.08	0.1	4.07	0.27	6.53	0.16	32.94	0.48	0.08	0	0.13	100.84	89.9919
DSH00-3	Opx	Jiaohe	Zhou et al. (2007)	56.27	0.1	4.35	0.3	6.62	0.17	32.77	0.62	0.05	0.01	0.1	101.36	89.8207
DSH00-4	Opx	Jiaohe	Zhou et al. (2007)	55.65	0.06	3.53	0.35	6.38	0.1	33.33	0.44	0.04	0.02	0.09	99.99	90.3028
DSH00-5	Opx	Jiaohe	Zhou et al. (2007)	56.37	0.12	3.53	0.3	6.38	0.17	33.18	0.68	0.08	0.01	0.07	100.89	90.2633
DSH00-6	Opx	Jiaohe	Zhou et al. (2007)	56.38	0.12	3.98	0.27	6.42	0.17	32.88	0.5	0.12	0.02	0.1	100.96	90.1277
DSH00-7	Opx	Jiaohe	Zhou et al. (2007)	55.11	0.11	4.33	0.27	6.84	0.12	32.95	0.41	0.06	0	0.07	100.27	89.5692
DSH00-8	Opx	Jiaohe	Zhou et al. (2007)	55.81	0.04	3.82	0.36	6.32	0.14	33.51	0.34	0.04	0	0.06	100.44	90.432
DSH00-10	Opx	Jiaohe	Zhou et al. (2007)	57.07	0.1	3.32	0.58	5.51	0.12	33.97	0.43	0.09	0.03	0.07	101.29	91.6595
DSH00-11	Opx	Jiaohe	Zhou et al. (2007)	55.94	0.04	3.48	0.38	6.16	0.15	33.17	0.38	0.03	0.04	0.09	99.86	90.5648
DSH00-12	Opx	Jiaohe	Zhou et al. (2007)	55.56	0.09	4.18	0.32	6.31	0.17	33.14	0.44	0.08	0.01	0.13	100.43	90.3493
YQS-1	Opx	Jiaohe	Yu et al. (2009)	55.57	0.06	2.92	0.3	6.39	0.15	34.96	0.42	0.02		0.12	100.91	90.6998
YQS-2	Opx	Jiaohe	Yu et al. (2009)	57.14	0.04	1.37	0.33	5.43	0.13	36	0.46	0.03		0.09	101.02	92.1985
YQS-3	Opx	Jiaohe	Yu et al. (2009)	55.58	0.06	2.78	0.31	6.27	0.15	34.87	0.41	0.03		0.11	100.57	90.837
YQS-4	Opx	Jiaohe	Yu et al. (2009)	56.17	0.06	2.33	0.37	5.81	0.13	35.24	0.46	0.02		0.08	100.67	91.534
YQS-5	Opx	Jiaohe	Yu et al. (2009)	55.99	0.05	2.41	0.35	6.2	0.14	35.03	0.39	0.02		0.06	100.64	90.9677
YQS-6	Opx	Jiaohe	Yu et al. (2009)	56.01	0.04	2.88	0.35	5.71	0.17	35.18	0.42	0.05		0.06	100.87	91.6545
YQS-7	Opx	Jiaohe	Yu et al. (2009)	55.59	0.12	3.34	0.3	6.64	0.16	34.6	0.43	0.05		0.12	101.35	90.2805
YQS-8	Opx	Jiaohe	Yu et al. (2009)	56.03	0.01	2.6	0.48	6	0.14	35.05	0.59	0.05		0.07	101.02	91.2381
YQS-9	Opx	Jiaohe	Yu et al. (2009)	55.33	0.12	3.82	0.3	6.48	0.15	34.07	0.48	0.08		0.13	100.96	90.3588
YQS-10	Opx	Jiaohe	Yu et al. (2009)	56.45	0.07	2.3	0.4	5.72	0.15	35.01	0.51	0.03		0.27	100.91	91.6039
YQS-11	Opx	Jiaohe	Yu et al. (2009)	56.53	0.05	2.45	0.41	5.46	0.14	35.26	0.53	0.07		0.35	101.25	92.0074
YQS-12	Opx	Jiaohe	Yu et al. (2009)	55.68	0.07	3.17	0.51	5.69	0.12	34.29	0.84	0.09		0.14	100.6	91.4838
YQS-14	Opx	Jiaohe	Yu et al. (2009)	56.16	0.04	2.41	0.48	5.6	0.12	34.06	0.53	0.03		0.11	99.54	91.5553
YQS-15	Opx	Jiaohe	Yu et al. (2009)	56.27	0.09	2.26	0.44	5.58	0.12	35.04	0.56	0.06		0.13	100.55	91.799
YQS-16	Opx	Jiaohe	Yu et al. (2009)	55.99	0.05	2.88	0.48	5.84	0.15	35	0.56	0.07		0.12	101.14	91.4406
DSH009	Opx	Jiaohe	Hao et al. (2016)	54.73	0.1	4.36	0.28	6.39	0.12	33.06	0.51	0.06	0.01	0.08	99.7	90.2176
DSH0012	Opx	Jiaohe	Hao et al. (2016)	55.48	0.05	4.09	0.25	5.88	0.11	32.53	0.55	0.05	0	0.06	99.05	90.7933
DSH0014	Opx	Jiaohe	Hao et al. (2016)	55.68	0.08	3.98	0.36	5.9	0.16	32.84	0.51	0.05	0	0.09	99.65	90.8441
DSH0017	Opx	Jiaohe	Hao et al. (2016)	55.24	0.06	3.21	0.41	6.05	0.12	33.66	0.63	0.05	0	0.07	99.5	90.8404
17JH4	Opx	Jiaohe	Guo et al. (2020)	55.14	0.1	4.39	0.28	6.6	0.14	32.17	0.67	0.15	0.02	0.09	99.75	89.6786
17JH5	Opx	Jiaohe	Guo et al. (2020)	56.39	0.04	2.59	0.52	5.24	0.1	33.78	0.55	0.09	0.01	0.07	99.38	91.9945
17JH14		Jiaohe	Guo et al. (2020)
17JH18	Opx	Jiaohe	Guo et al. (2020)	56.17	0.08	3.5	0.41	5.9	0.14	33.47	0.43	0.07	0.01	0.06	100.24	91.0009
17JH21	Opx	Jiaohe	Guo et al. (2020)	56	0.09	3.6	0.44	5.86	0.12	33.21	0.6	0.1	0.01	0.11	100.14	90.9927
17JH24	Opx	Jiaohe	Guo et al. (2020)	56.11	0.06	3.33	0.49	5.6	0.13	33.45	0.68	0.16	0.02	0.05	100.08	91.4145
WQ91-1	Opx	Wangqing	Xu et al. (1998)	54.58	0.19	5.47	0.57	6.33	0.18	30.64	1.4	0.23		0.08	99.67	89.614
WQ91-37	Opx	Wangqing	Xu et al. (1998)	55.73	0.2	5.03	0.47	6.33	0.11	31.6	1.96	0.19		0.1	101.72	89.8976
WQ91-6	Opx	Wangqing	Xu et al. (1998)	54.51	0.13	5.31	0.43	6.62	0.1	32.05	0.58	0.12		0.1	99.95	89.6158
WQ91-11	Opx	Wangqing	Xu et al. (1998)	54.98	0.04	4.36	0.61	5.54	0.17	32.75	0.67	0.07		0.08	99.27	91.3327
WQ91-77	Opx	Wangqing	Xu et al. (1998)	55.98	0.1	3.31	0.52	5.49	0.13	33.5	0.57	0.09		0.07	99.76	91.5805
WQ91-5	Opx	Wangqing	Xu et al. (1998)	56.8	0	1.97	0.54	5.42	0.1	34.37	0.78	0.09		0.14	100.21	91.8724
WQ91-13	Opx	Wangqing	Xu et al. (1998)	57.46	0.03	2.18	0.63	5.75	0.16	34.33	0.67	0.08		0.1	101.39	91.4109
WQ91-20	Opx	Wangqing	Xu et al. (1998)	55.51	0.12	3.47	0.41	5.87	0.12	33.11	0.55	0.04		0.1	99.3	90.954
WQ91-21	Opx	Wangqing	Xu et al. (1998)	55.78	0.05	3.04	0.33	6.05	0.14	33.31	0.49	0.03		0.12	99.34	90.753
WQ91-22	Opx	Wangqing	Xu et al. (1998)	57.16	0.14	2.21	0.4	5.94	0.12	34.34	0.59	0.07		0.03	101	91.1545
WQ5	Opx	Wangqing	Song et al. (2013)	54.43	0.09	3.91	0.29	6.6	0.16	33.78	0.51	0.09			99.86	90.1219
WQ9		Wangqing	Song et al. (2013)
WQ10	Opx	Wangqing	Song et al. (2013)	55.52	0.14	3.21	0.28	6.85	0.13	33.1	0.4	0.09			99.72	89.598
WQ13	Opx	Wangqing	Song et al. (2013)	55.56	0.11	3.37	0.31	6.27	0.11	33.13	0.46	0.13			99.45	90.402
WQ15	Opx	Wangqing	Song et al. (2013)	55.05	0.07	4.01	0.38	6.45	0.15	33.25	0.43	0.08			99.87	90.1856
WQ16	Opx	Wangqing	Song et al. (2013)	54.31	0.11	4.03	0.27	5.92	0.09	34.02	0.46	0.04			99.25	91.1061
PFS5	Opx	Wangqing	Wang et al. (2013)	55.52	0.06	3	0.2	5.94	0.13	33.79	0.54	0.12		0.1	99.4	91.0235
PFS10	Opx	Wangqing	Wang et al. (2013)	55.52	0.14	3.21	0.28	6.85	0.13	33.1	0.4	0.09		0.11	99.83	89.598
PFS13	Opx	Wangqing	Wang et al. (2013)	55.56	0.11	3.37	0.31	6.27	0.11	33.13	0.46	0.13		0.14	99.59	90.402
PFS15	Opx	Wangqing	Wang et al. (2013)	55.17	0.11	3.21	0.25	5.9	0.13	34.11	0.41	0.09		0.12	99.5	91.1548
PFS16	Opx	Wangqing	Wang et al. (2013)	54.31	0.11	4.03	0.27	5.92	0.09	34.02	0.46	0.04		0.11	99.36	91.1061
WQ39	Opx	Wangqing	Hao et al. (2016)	56.3	0.04	2.43	0.52	6.23	0.13	33.33	0.56	0.04	0.01	0.06	99.65	90.5092
WQ62	Opx	Wangqing	Hao et al. (2016)	55.83	0.08	3.7	0.33	5.82	0.15	33.02	0.48	0.01	0	0.06	99.48	91.0018
WQ72	Opx	Wangqing	Hao et al. (2016)	55.23	0.1	4.07	0.26	6.51	0.14	32.43	0.49	0.07	0	0.07	99.37	89.8784
WQ-004	Opx	Wangqing	Hao et al. (2016)	54.53	0.06	3.93	0.27	6.73	0.16	33.68	0.46	0.04	0	0.02	99.88	89.9201
WQ-005	Opx	Wangqing	Hao et al. (2016)	55.61	0.05	3.33	0.24	6.52	0.15	34.59	0.35	0.04	0.01	0.04	100.93	90.4369
WQ-006	Opx	Wangqing	Hao et al. (2016)	54.95	0.08	3.66	0.28	6.7	0.16	34.07	0.38	0.02	0	0.02	100.32	90.064
WQ-101	Opx	Wangqing	Hao et al. (2016)	54.63	0.06	3.8	0.26	6.45	0.16	33.77	0.61	0.04	0.02	0.04	99.84	90.3221
northeastern NCC
CBH1	Opx	Changbaishan	Liu (2014)	54.86	0.12	4.3	0.35	6.25	0.16	33.05	0.59	0.06	0.02	0.12	99.88	90.4087
CBH2	Opx	Changbaishan	Liu (2014)	55.57	0.11	3.95	0.4	6.21	0.12	32.44	0.78	0.07		0.12	99.77	90.3023
CBH3	Opx	Changbaishan	Liu (2014)	55.63	0.13	4.11	0.34	6.24	0.13	31.96	0.66	0.1	0.02	0.12	99.44	90.1282
CBH4	Opx	Changbaishan	Liu (2014)	54.08	0.17	4.9	0.31	6.69	0.1	32.42	0.81	0.15	0.01	0.13	99.77	89.6247
CBH5	Opx	Changbaishan	Liu (2014)	56.51	0.11	3.04	0.41	6.09	0.12	32.84	0.56	0.08		0.13	99.89	90.577
CBH6	Opx	Changbaishan	Liu (2014)	55.16	0.04	3.9	0.45	6.17	0.11	32.65	0.76	0.03		0.14	99.41	90.4148
CBH7	Opx	Changbaishan	Liu (2014)	55.45	0.1	4.16	0.47	6.23	0.1	32.36	0.72	0.1		0.11	99.8	90.2524
CBH8	Opx	Changbaishan	Liu (2014)	55.69	0.12	3.76	0.27	6.26	0.13	32.95	0.49	0.08		0.14	99.89	90.3685
BDX-01	Opx	Changbaishan	Par et al. (2017)	55.0898	0.09125	4.283	0.37425	6.13075	0.13725	32.6262	0.68825	0.1095	0.0146667	0.0625	99.6554	90.4637
BDX-02	Opx	Changbaishan	Par et al. (2017)	55.1086	0.105286	4.26471	0.271143	6.81386	0.156	32.4854	0.494857	0.0571667	0.017	0.0607143	99.8587	89.4719
BDX-03	Opx	Changbaishan	Par et al. (2017)	55.1493	0.0927143	3.97686	0.240714	6.72529	0.161429	32.6231	0.523857	0.0464286	0.0185	0.072	99.6722	89.6339
BDX-04	Opx	Changbaishan	Par et al. (2017)	55.0454	0.1148	4.0232	0.2752	6.7646	0.1416	32.278	0.5114	0.0678	0.00966667	0.069	99.3307	89.4799
BDX-05	Opx	Changbaishan	Par et al. (2017)	55.1025	0.082	3.65375	0.40675	6.3725	0.154	32.5725	0.46275	0.025	0.00666667	0.0635	98.9239	90.1101
BDX-06	Opx	Changbaishan	Par et al. (2017)	55.2453	0.0615	3.668	0.347	5.942	0.14525	32.9195	0.51	0.05075	0.014	0.084	99.0323	90.8051
BDX-07	Opx	Changbaishan	Par et al. (2017)	54.921	0.10275	3.94575	0.282	6.6035	0.15225	32.6247	0.45975	0.05475	0.012	0.1	99.2765	89.8029
BDX-08	Opx	Changbaishan	Par et al. (2017)	55.0742	0.07625	3.69075	0.3575	6.4065	0.15125	32.672	0.448	0.0645	0.011	0.08475	99.0467	90.0899
BDX-09	Opx	Changbaishan	Par et al. (2017)	55.2477	0.0815	3.46575	0.351	6.32225	0.144	32.9735	0.42025	0.02775	0.0165	0.0795	99.1397	90.2883
BDX-13	Opx	Changbaishan	Par et al. (2017)	55.4185	0.08175	4.1045	0.39925	6.11375	0.14325	32.8675	0.5175	0.06125	0.01	0.08575	99.851	90.5509
BDX-14-1	Opx	Changbaishan	Par et al. (2017)	55.5478	0.05875	4.02725	0.38625	6.1125	0.14475	32.7323	0.731	0.084	0.009	0.09575	99.9573	90.5173
BDX-14-2	Opx	Changbaishan	Par et al. (2017)	56.4733	0.033	2.04625	0.58375	5.411	0.126	33.5515	0.91225	0.0255	0.0045	0.12175	99.3247	91.7033
BDX-15-1	Opx	Changbaishan	Par et al. (2017)	56.1025	0.0393333	2.46375	0.6485	5.57	0.12275	33.3365	0.85	0.08625	0.016	0.0855	99.3331	91.43
BDX-15-2	Opx	Changbaishan	Par et al. (2017)	55.3287	0.1225	3.692	0.42175	6.206	0.163	32.7263	0.484	0.06	0.00866667	0.07725	99.3022	90.3846
BDX-16-1	Opx	Changbaishan	Par et al. (2017)	54.8007	0.113333	4.583	0.314667	6.44833	0.146	31.9913	0.727	0.0926667	0.006	0.0593333	99.2823	89.8411
BDX-16-2	Opx	Changbaishan	Par et al. (2017)	55.0313	0.0993333	3.931	0.307667	6.834	0.128667	32.51	0.497667	0.049	0.005	0.0743333	99.468	89.4512
CBS01	Opx	Changbaishan	Xu et al. (2019)	55.725	0.1	3.737	0.372	6.113	0.149	33.738	0.51	0.093	0	0.094	100.631	90.7732
CBS02	Opx	Changbaishan	Xu et al. (2019)	55.933	0.136	4.038	0.407	5.934	0.136	33.551	0.486	0.045	0.008	0.109	100.783	90.9736
CBS03	Opx	Changbaishan	Xu et al. (2019)	55.055	0.1	4.371	0.418	6.057	0.136	33.168	0.59	0.05	0.004	0.102	100.051	90.7074
CBS04	Opx	Changbaishan	Xu et al. (2019)	56.002	0.087	4.046	0.435	6.077	0.131	33.288	0.472	0.053	0	0.087	100.678	90.71
CBS05	Opx	Changbaishan	Xu et al. (2019)	55.695	0.097	3.642	0.372	5.886	0.137	33.679	0.483	0.058	0.013	0.083	100.145	91.0711
CBS06	Opx	Changbaishan	Xu et al. (2019)	55.585	0.107	4.416	0.417	6.494	0.137	33.218	0.519	0.048	0.006	0.043	100.99	90.1167
CBS07	Opx	Changbaishan	Xu et al. (2019)	55.685	0.102	4.327	0.387	6.578	0.152	33.119	0.424	0.027	0.008	0.099	100.908	89.9748
CBS08	Opx	Changbaishan	Xu et al. (2019)	56.116	0.032	3.86	0.345	6.571	0.176	33.579	0.451	0.039	0.007	0.081	101.257	90.108
CBS09	Opx	Changbaishan	Xu et al. (2019)	55.774	0.1	4.163	0.348	6.484	0.166	33.282	0.437	0.043	0.012	0.065	100.874	90.1475
CBS10	Opx	Changbaishan	Xu et al. (2019)	55.865	0.086	3.931	0.323	6.467	0.144	33.132	0.505	0.045	0	0.064	100.562	90.1307
CBS11	Opx	Changbaishan	Xu et al. (2019)	55.29	0.0854	4.0178	0.2498	6.6198	0.1464	32.8398	0.4768	0.0464	0.0154	0.0722	99.8622	89.8405
CBS12	Opx	Changbaishan	Xu et al. (2019)	55.1784	0.0962	3.7864	0.384	5.776	0.1354	33.1392	0.5316	0.0762	0.0194	0.0742	99.197	91.0931
TC01	Opx	Changbaishan	Xu et al. (2020)	56.6	0.06	2.95	0.32	5.95	0.13	33.45	0.6	0.05	0	0.01	100.12	90.9266
TC02	Opx	Changbaishan	Xu et al. (2020)	56.03	0.05	3.48	0.29	6.59	0.13	33.13	0.47	0.02	0	0	100.19	89.9613
TC03	Opx	Changbaishan	Xu et al. (2020)	56.32	0.07	3.52	0.38	5.95	0.13	33.28	0.52	0.05	0	0.01	100.23	90.8845
TC04	Opx	Changbaishan	Xu et al. (2020)	56.78	0.05	3.31	0.6	5.6	0.12	33.35	0.8	0.06	0	0	100.67	91.391
TC05	Opx	Changbaishan	Xu et al. (2020)	55.55	0.08	4.02	0.28	6.75	0.15	32.64	0.43	0.04	0	0	99.94	89.6046
TC06	Opx	Changbaishan	Xu et al. (2020)	56.02	0.07	3.85	0.26	6.66	0.15	33.02	0.37	0.02	0.01	0	100.43	89.8351
TC07	Opx	Changbaishan	Xu et al. (2020)	55.87	0.08	3.84	0.24	6.74	0.14	32.82	0.48	0.03	0	0	100.24	89.6694
TC08	Opx	Changbaishan	Xu et al. (2020)	56.49	0.08	3.64	0.36	5.83	0.13	33.39	0.49	0.06	0	0	100.47	91.0787
SJXO-1	Opx	Huinan	Xu et al. (2003)	54.7	0.08	3.63	0.21	6.87	0.17	33.59	0.9	0.06	0.01		100.22	89.7072
SJXO-2	Opx	Huinan	Xu et al. (2003)	53.83	0.09	4.1	0.44	6.12	0.09	34.93	0.89	0.09	0.02		100.6	91.0506
SJXO-3	Opx	Huinan	Xu et al. (2003)	54.77	0.06	1.59	0.22	5.77	0.12	35.81	0.4	0	0		98.74	91.7102
SJXO-4	Opx	Huinan	Xu et al. (2003)	53.94	0.06	3.64	0.34	6.75	0.1	33.98	0.38	0.02	0		99.21	89.9734
SJXO-6	Opx	Huinan	Xu et al. (2003)	53.05	0.21	5.11	0.39	7.02	0	32.49	1.09	0.07	0		99.43	89.1892
SJXO-8	Opx	Huinan	Xu et al. (2003)	54.7	0	1.75	0.25	5.97	0.07	35.6	0.53	0	0.03		98.9	91.4013
DLW-9	Opx	Huinan	Xu et al. (2003)	53.5	0.08	4.81	0.35	6.27	0.1	34.3	0.57	0.04	0.03		100.05	90.6989
DYS-12	Opx	Huinan	Xu et al. (2003)	53.32	0.1	3.74	0.26	6.26	0.18	34.73	0.52	0.05	0		99.16	90.8168
DYS-5	Opx	Huinan	Xu et al. (2003)	54.76	0.08	3.25	0.2	6.81	0.16	34.09	0.39	0.04	0		99.78	89.9226
DYS-9	Opx	Huinan	Xu et al. (2003)	52.72	0.04	3.35	0.37	7.2	0.13	34.95	0.78	0.09	0		99.63	89.6403
DLW-3	Opx	Huinan	Xu et al. (2003)	54.66	0.05	1.97	0.37	6.35	0.07	34.27	0.92	0.05	0		98.71	90.584
DLW-4	Opx	Huinan	Xu et al. (2003)	54.64	0.13	1.44	0.28	5.72	0.16	34.8	0.5	0.07	0.01		97.75	91.5575
DLW-5	Opx	Huinan	Xu et al. (2003)	54.7	0.13	1.99	0.39	5.76	0.07	35.51	0.51	0.12	0.04		99.22	91.6592
DLW-6	Opx	Huinan	Xu et al. (2003)	55.73	0.08	1.04	0.32	5.87	0.12	35.51	0.45	0.02	0.01		99.15	91.5135
DLW-7	Opx	Huinan	Xu et al. (2003)	55.4	0.06	1.67	0.3	5.87	0.06	35.18	0.41	0.04	0		98.99	91.4407
DLW-8	Opx	Huinan	Xu et al. (2003)	54.48	0.06	1.98	0.48	5.28	0.07	35.13	0.82	0.12	0		98.42	92.224
DYS-1	Opx	Huinan	Xu et al. (2003)	54.67	0.11	1.63	0.46	5.73	0	35.84	0.6	0.07	0		99.11	91.7692
DYS-2	Opx	Huinan	Xu et al. (2003)	55.14	0.12	1.7	0.49	5.47	0.1	35.53	0.91	0.17	0.02		99.65	92.0499
DYS-3	Opx	Huinan	Xu et al. (2003)	55.22	0.16	1.51	0.41	5.36	0.12	35.51	0.65	0.04	0.03		99.01	92.1932
DYS-4	Opx	Huinan	Xu et al. (2003)	54.16	0.03	3.3	0.3	5.98	0	33.16	0.69	0.1	0.02		97.74	90.8126
DYS-6		Huinan	Xu et al. (2003)
DYS-7	Opx	Huinan	Xu et al. (2003)	54.96	0.15	2.63	0.32	5.35	0	35.07	0.6	0.07	0		99.15	92.1166
DYS-8	Opx	Huinan	Xu et al. (2003)	56.26	0.08	1.35	0.48	5.58	0	34.92	0.79	0.08	0.01		99.55	91.7732
DYS-21	Opx	Huinan	Xu et al. (2003)	54.37	0.11	1.93	0.53	5.57	0.07	35.47	1.02	0.13	0.01		99.21	91.9037
06JY02	Opx	Huinan	Tang et al. (2012)	54.5	0.08	4.39	0.39	6.05	0.14	32.5	0.87	0.16	0.01	0.1	99.19	90.5444
06JY06	Opx	Huinan	Tang et al. (2012)	54.7	0.11	3.65	0.5	6.28	0.14	32.4	0.84	0.09	0.01	0.09	98.81	90.1928
06JY30	Opx	Huinan	Tang et al. (2012)	54.6	0.14	4.65	0.34	6.25	0.13	32.2	0.96	0.13	0.01	0.09	99.5	90.1804
06JY31	Opx	Huinan	Tang et al. (2012)	55.3	0.1	3.38	0.6	5.86	0.12	32.7	0.94	0.11	0	0.11	99.22	90.8651
06JY34	Opx	Huinan	Tang et al. (2012)	56	0.03	2.77	0.58	5.06	0.11	33.5	0.69	0.16	0.01	0.09	99	92.1884
DLW1	Opx	Huinan	Wang et al. (2013)	55.88	0.15	2.82	0.58	5.52	0.1	33.83	0.77	0.09		0.12	99.86	91.614
DLW3	Opx	Huinan	Wang et al. (2013)	54.73	0.09	4.14	0.41	6.42	0.16	32.7	0.64	0.09		0.13	99.51	90.0787
DLW5	Opx	Huinan	Wang et al. (2013)	56.03	0.07	3.55	0.3	6.31	0.18	32.52	0.6	0.12		0.15	99.83	90.1834
DLW6	Opx	Huinan	Wang et al. (2013)	56.95	0.08	2.52	0.4	5.7	0.14	33.42	0.49	0.1		0.15	99.95	91.2674
DLW8	Opx	Huinan	Wang et al. (2013)	55.6	0.07	3.29	0.21	6.67	0.13	33.18	0.4	0.04		0.09	99.68	89.8655
DYS1	Opx	Huinan	Wang et al. (2013)	56.13	0.11	2.81	0.45	5.69	0.1	33.75	0.62	0.1		0.16	99.92	91.3593
DYS4	Opx	Huinan	Wang et al. (2013)	55.22	0.11	4.14	0.28	6.72	0.17	32.23	0.54	0.07		0.15	99.63	89.5281
DYS5	Opx	Huinan	Wang et al. (2013)	56.09	0.13	2.85	0.49	5.71	0.13	33.23	0.71	0.13		0.11	99.58	91.2078
DYS7	Opx	Huinan	Wang et al. (2013)	56.49	0.1	2.78	0.44	5.61	0.11	32.98	0.63	0.09		0.09	99.32	91.2886
DYS9	Opx	Huinan	Wang et al. (2013)	54.9	0.14	3.61	0.24	6.32	0.14	33.74	0.5	0.07		0.13	99.79	90.491
DYS12	Opx	Huinan	Wang et al. (2013)	56.44	0.13	2.71	0.42	5.8	0.12	33.33	0.53	0.06		0.11	99.65	91.106
DYS13	Opx	Huinan	Wang et al. (2013)	56.59	0.13	2.91	0.48	5.65	0.1	32.97	0.7	0.12		0.14	99.79	91.2295
DYS14	Opx	Huinan	Wang et al. (2013)	55.72	0.13	2.78	0.42	5.63	0.1	34.46	0.57	0.06		0.13	100	91.6041
LQL1	Opx	Huinan	Wang et al. (2013)	54.45	0.1	3.27	0.53	5.94	0.12	33.66	0.87	0.08		0.12	99.14	90.9919
LQL3	Opx	Huinan	Wang et al. (2013)	55.96	0.12	3.08	0.24	6.32	0.14	33.31	0.47	0.04		0.12	99.8	90.3801
LQL4	Opx	Huinan	Wang et al. (2013)	55.43	0.09	3.88	0.46	6.5	0.12	32.34	0.84	0.13		0.11	99.9	89.8671
LQL6	Opx	Huinan	Wang et al. (2013)	53.87	0.11	4.32	0.34	6.01	0.14	33.45	0.74	0.13		0.14	99.25	90.8435
LQL7	Opx	Huinan	Wang et al. (2013)	54.39	0.15	3.6	0.44	6.68	0.15	33.65	0.76	0.09		0.12	100.03	89.9794
LQL8	Opx	Huinan	Wang et al. (2013)	53.59	0.14	4.57	0.34	6.73	0.15	33.08	0.88	0.1		0.14	99.72	89.756
HLW1	Opx	Huinan	Liu (2014)	55.67	0.22	3.41	0.78	5.66	0.13	32.08	1.32	0.13	0.02	0.13	99.55	90.9936
HLW2	Opx	Huinan	Liu (2014)	56.56	0.1	2.53	0.38	5.85	0.14	33.45	0.55	0.06		0.1	99.72	91.0655
HLW3	Opx	Huinan	Liu (2014)	55.38	0.2	3.09	0.69	5.6	0.14	33.25	1.21	0.15		0.16	99.87	91.3673
HLW4	Opx	Huinan	Liu (2014)	55.06	0.1	4.2	0.43	6.33	0.12	32.08	1.15	0.1		0.14	99.71	90.0337
HLW5	Opx	Huinan	Liu (2014)	55.95	0.03	3.23	0.31	6.57	0.12	32.8	0.51	0.05		0.15	99.72	89.8982
HYZ1	Opx	Huinan	Liu (2014)	56.47	0.11	2.96	0.58	5.71	0.15	33.14	0.54	0.08		0.14	99.88	91.1861
HYZ2	Opx	Huinan	Liu (2014)	55.18	0.15	4.51	0.29	6.71	0.11	31.45	0.91	0.14		0.16	99.61	89.3104
HYZ3	Opx	Huinan	Liu (2014)	56.08	0.13	3.09	0.65	5.73	0.12	32.79	0.83	0.15		0.15	99.72	91.072
HYZ4	Opx	Huinan	Liu (2014)	56.42	0.14	3.07	0.5	5.66	0.1	32.32	1.01	0.11	0.01	0.15	99.49	91.0545
HYZ5	Opx	Huinan	Liu (2014)	54.61	0.15	3.89	0.26	6.32	0.13	33.5	0.56	0.06		0.11	99.59	90.4294
HYZ6	Opx	Huinan	Liu (2014)	55.89	0.18	2.74	0.45	5.78	0.12	33.58	0.51	0.09		0.13	99.47	91.1941
HYZ7	Opx	Huinan	Liu (2014)	55.89	0.12	3.07	0.49	5.52	0.11	33.92	0.68	0.12		0.14	100.06	91.6344
HYZ8	Opx	Huinan	Liu (2014)	56	0.11	2.77	0.43	5.71	0.1	33.44	0.6	0.08	0.01	0.15	99.4	91.2582
HQL1	Opx	Huinan	Liu (2014)	54.45	0.08	3.32	0.46	5.96	0.13	33.43	1	0.09	0.02	0.15	99.09	90.9078
HQL2	Opx	Huinan	Liu (2014)	55.96	0.1	3.13	0.27	6.25	0.09	32.78	0.51	0.07		0.12	99.28	90.3374
HQL3	Opx	Huinan	Liu (2014)	53.92	0.08	4.01	0.44	6.34	0.12	33.39	0.89	0.13	0.02	0.14	99.48	90.3734
HQL4	Opx	Huinan	Liu (2014)	55.37	0.15	3.39	0.41	6.83	0.19	32.36	0.82	0.05		0.13	99.7	89.4131
HQL5	Opx	Huinan	Liu (2014)	53.51	0.14	5.17	0.42	6.72	0.12	32.42	1.21	0.19	0.02	0.15	100.07	89.5831
HNd065	Opx	Huinan	Lin et al. (2019)	56.191	0.07275	2.422	0.4425	5.365	0.1415	33.7822	0.61075	0.1055			99.1438	91.8196
HNd066	Opx	Huinan	Lin et al. (2019)	56.5884	0.0528571	3.21414	0.433	5.6	0.129571	33.0874	0.616	0.102429			99.8351	91.3286
HNd067	Opx	Huinan	Lin et al. (2019)	57.0044	0.123	2.2854	0.4656	5.1702	0.1458	33.8298	0.6108	0.0856			99.7256	92.1034
HNd068	Opx	Huinan	Lin et al. (2019)	57.0359	0.097875	2.1915	0.4845	5.14087	0.127	33.6215	0.577375	0.114375			99.3961	92.0998
HNd069	Opx	Huinan	Lin et al. (2019)	57.1338	0.074	2.344	0.4392	5.274	0.1124	33.5242	0.6828	0.0906			99.6846	91.8902
HNd071	Opx	Huinan	Lin et al. (2019)	57.2212	0.0514	2.1126	0.464	5.214	0.1152	33.7722	0.6188	0.1136			99.689	92.0293
HNd074	Opx	Huinan	Lin et al. (2019)	57.158	0.0435	2.10325	0.47175	5.2665	0.13825	33.8147	0.732	0.095			99.8278	91.9648
HNd075	Opx	Huinan	Lin et al. (2019)	56.619	0.1224	2.9318	0.439	5.5182	0.135	33.5586	0.5682	0.0872			99.982	91.5544
HNd072	Opx	Huinan	Lin et al. (2019)	56.3728	0.065	3.2346	0.409	5.7994	0.1326	33.0864	0.566	0.0854			99.7594	91.0472
HNd077	Opx	Huinan	Lin et al. (2019)	56.2094	0.0658571	3.07271	0.467143	5.59014	0.127857	33.1049	0.692714	0.105857			99.4421	91.3467
HNd085	Opx	Huinan	Lin et al. (2019)	55.7265	0.11475	3.47825	0.5965	5.724	0.13275	32.7545	0.74675	0.10375			99.3855	91.0717
HNd087	Opx	Huinan	Lin et al. (2019)	55.7618	0.1832	3.3308	0.394	6.1512	0.1454	32.6682	0.6956	0.0682			99.408	90.4461
J001*	Opx	Huinan	Lin et al. (2019)	55.64	0.11	3.69	0.25	6.05	0.11	33.05	0.6	0.08			99.57	90.6871
J079*	Opx	Huinan	Lin et al. (2019)	55.5	0.2	3.65	0.32	6.28	0.12	32.77	0.5	0.04			99.37	90.2928
J082*	Opx	Huinan	Lin et al. (2019)	55.16	0.12	4.1	0.35	6.18	0.13	32.67	0.52	0.09			99.32	90.4061
J083*	Opx	Huinan	Lin et al. (2019)	55.64	0.09	3.32	0.31	6.19	0.12	33.33	0.47	0.31			99.79	90.5644
J193*	Opx	Huinan	Lin et al. (2019)	55.24	0.11	3.92	0.28	6.42	0.14	32.56	0.6	0.08			99.36	90.0403
J197*	Opx	Huinan	Lin et al. (2019)	55.77	0.12	3.66	0.23	6.53	0.15	32.26	0.48	0.06			99.27	89.8025
J198*	Opx	Huinan	Lin et al. (2019)	54.72	0.13	4.58	0.35	6.7	0.11	32.01	0.62	0.09			99.32	89.4918
J206*	Opx	Huinan	Lin et al. (2019)	55.75	0.11	3.26	0.34	5.84	0.11	33.86	0.46	0.03			99.77	91.1779
J247*	Opx	Huinan	Lin et al. (2019)	55.88	0.11	3.64	0.36	6.18	0.12	32.47	0.47	0.07			99.31	90.3527
J294*	Opx	Huinan	Lin et al. (2019)	55.11	0.13	4.34	0.38	6.5	0.13	31.81	1.32	0.11			99.83	89.7157
J328*	Opx	Huinan	Lin et al. (2019)	55.6	0.09	3.84	0.29	6.47	0.12	32.43	0.47	0.07			99.38	89.9344
J300*	Opx	Huinan	Lin et al. (2019)	54.49	0.11	4.65	0.24	7.04	0.14	32.28	0.47	0.11			99.53	89.0989
J301*	Opx	Huinan	Lin et al. (2019)	55.11	0.1	4.15	0.17	7.04	0.15	32.54	0.53	0.08			99.86	89.1766
J298*	Opx	Huinan	Lin et al. (2019)	56	0.1	3.02	0.57	5.87	0.11	32.84	0.81	0.08			99.41	90.8864
J230*	Opx	Huinan	Lin et al. (2019)	55.51	0.1	3.37	0.35	7.13	0.11	32.42	0.57	0.03			99.61	89.0173
J297*	Opx	Huinan	Lin et al. (2019)	54.89	0.26	4.19	0.2	7.32	0.14	31.68	0.62	0.09			99.39	88.5251
LG01	Opx	Huinan	Xu et al. (2019)	56.236	0.0858	3.5398	0.406	5.7532	0.111	33.8012	0.6318	0.0894	0.015	0.1192	100.788	91.2838
LG02	Opx	Huinan	Xu et al. (2019)	55.9658	0.0862	3.9066	0.3346	6.332	0.1474	33.1094	0.6714	0.0982	0.0112	0.0894	100.752	90.3108
LG03	Opx	Huinan	Xu et al. (2019)	55.148	0.136	4.446	0.365	7.904	0.147	31.327	0.782	0.143	0	0.12	100.518	87.6008
LG04	Opx	Huinan	Xu et al. (2019)	54.913	0.094	4.482	0.356	7.885	0.137	31.775	1.007	0.136	0.007	0.118	100.91	87.78
LG05	Opx	Huinan	Xu et al. (2019)	54.91	0.134	4.335	0.341	7.845	0.146	31.588	0.794	0.137	0.03	0.102	100.362	87.7713
LG06	Opx	Huinan	Xu et al. (2019)	55.227	0.079	4.52	0.295	6.181	0.127	32.908	0.804	0.081	0.007	0.129	100.358	90.4675
LG07	Opx	Huinan	Xu et al. (2019)	55.183	0.104	4.715	0.346	6.251	0.189	33.003	0.855	0.076	0.009	0.119	100.85	90.395
LG08	Opx	Huinan	Xu et al. (2019)	55.448	0.072	4.296	0.264	6.202	0.133	32.875	0.735	0.121	0.027	0.089	100.262	90.4295
LG09	Opx	Huinan	Xu et al. (2019)	56.059	0.115	3.146	0.505	5.507	0.134	34.026	0.755	0.155	0.002	0.099	100.503	91.6763
LG10	Opx	Huinan	Xu et al. (2019)	56.307	0.163	3.037	0.792	5.519	0.143	33.712	0.73	0.104	0.002	0.053	100.562	91.5885
LG01	Opx	Huinan	Xu et al. (2020)	55.36	0.08	4.77	0.34	6.42	0.14	32.43	0.78	0.08	0	0	100.4	90.0044
LG02	Opx	Huinan	Xu et al. (2020)	55.71	0.11	4.32	0.32	6.61	0.14	32.39	0.68	0.08	0	0.01	100.37	89.7276
LG03	Opx	Huinan	Xu et al. (2020)	54.62	0.11	4.76	0.39	8.65	0.15	30.07	1.21	0.13	0	0	100.09	86.1047
LG04	Opx	Huinan	Xu et al. (2020)	56.37	0.08	3.91	0.33	6.45	0.13	32.89	0.65	0.07	0	0	100.88	90.0888
LG05	Opx	Huinan	Xu et al. (2020)	56.32	0.08	3.89	0.31	6.29	0.13	32.88	0.61	0.07	0	0	100.58	90.3082
LG06	Opx	Huinan	Xu et al. (2020)	56.25	0.08	3.87	0.34	6.36	0.14	32.75	0.64	0.07	0	0	100.5	90.1759
LG07	Opx	Huinan	Xu et al. (2020)	56.09	0.08	3.87	0.56	5.56	0.12	32.93	1.01	0.13	0	0	100.35	91.3476
LG08	Opx	Huinan	Xu et al. (2020)	56.99	0.02	2.94	0.53	5.37	0.11	33.66	0.77	0.07	0	0.01	100.47	91.7853
LG09	Opx	Huinan	Xu et al. (2020)	56.31	0.07	3.48	0.41	5.72	0.11	33.13	0.61	0.06	0	0	99.9	91.1696
LG11	Opx	Huinan	Xu et al. (2020)	55.79	0.09	3.8	0.26	6.53	0.14	32.74	0.67	0.07	0	0	100.09	89.9369
LG12	Opx	Huinan	Xu et al. (2020)	56.11	0.08	3.56	0.25	6.52	0.14	32.99	0.46	0.05	0	0.01	100.17	90.0194
LG13	Opx	Huinan	Xu et al. (2020)	56.01	0.05	3.46	0.23	6.98	0.16	32.67	0.49	0.04	0	0.01	100.1	89.2971
HY1-01	Opx	Kuandian	Wu et al. (2006)	54.68	0.03	3.47	0.57	5.36	0.12	34.01	0.72	0.07	0.02	0.12	99.17	91.8769
HY2-01	Opx	Kuandian	Wu et al. (2006)	54.42	0.03	3.39	0.41	5.91	0.2	33.91	0.61	0.02	0	0.13	99.03	91.0935
HY2-02	Opx	Kuandian	Wu et al. (2006)	54.15	0.07	4.7	0.34	6.15	0.2	32.91	0.8	0.13	0	0.18	99.63	90.5113
HY2-03	Opx	Kuandian	Wu et al. (2006)	54.95	0.08	3.34	0.28	6.21	0.1	33.74	0.43	0.06	0.01	0.06	99.26	90.641
HY2-04	Opx	Kuandian	Wu et al. (2006)	56.01	0.05	4.35	0.31	6.43	0.12	33.81	0.61	0.08	0.03	0.06	101.86	90.3595
HY2-05	Opx	Kuandian	Wu et al. (2006)	55.06	0.09	3.06	0.56	5.35	0.1	34.26	0.69	0.05	0.01	0.12	99.35	91.9452
HY2-06	Opx	Kuandian	Wu et al. (2006)	54.59	0.04	3.01	0.29	6.3	0.22	34.33	0.35	0.01	0.02	0.09	99.25	90.666
HY2-07	Opx	Kuandian	Wu et al. (2006)	53.18	0.19	5.39	0.43	6.27	0.13	32.07	1.16	0.14	0	0.06	99.02	90.1161
HY2-14	Opx	Kuandian	Wu et al. (2006)	54.36	0.11	4.23	0.54	5.88	0.17	33.29	0.87	0.1	0.01	0.05	99.61	90.9845
HY2-29	Opx	Kuandian	Wu et al. (2006)	54.18	0.11	5.15	0.34	6.63	0.12	33.27	0.7	0.1	0	0.14	100.74	89.9447
DCT1	Opx	Kuandian	Wang et al. (2013)	53.53	0.16	3.26	0.55	7.08	0.16	33.7	0.67	0.11			99.22	89.4568
DCT2	Opx	Kuandian	Wang et al. (2013)	56.3	0.1	2.78	0.33	5.95	0.1	33.63	0.41	0.05			99.65	90.9708
DCT3	Opx	Kuandian	Wang et al. (2013)	54.31	0.08	3.55	0.42	5.34	0.13	34.99	0.44	0.21			99.47	92.1136
DCT5	Opx	Kuandian	Wang et al. (2013)	52.68	0.19	5.52	0.43	6.15	0.15	32.7	1.12	0.19			99.13	90.4562
DCT8	Opx	Kuandian	Wang et al. (2013)	53.36	0.13	4.24	0.35	5.71	0.12	34.36	0.68	0.12			99.07	91.4723
DCT9	Opx	Kuandian	Wang et al. (2013)	52.73	0.15	5.26	0.59	5.99	0.12	33.15	1.17	0.18			99.34	90.7962
HYS1	Opx	Kuandian	Wang et al. (2013)	53.94	0.1	3.6	0.19	6.23	0.15	34.41	0.45	0.03			99.1	90.7796
HYS4	Opx	Kuandian	Wang et al. (2013)	53.46	0.13	4	0.25	6.53	0.15	34.24	0.44	0.06			99.26	90.3352
HYS2	Opx	Kuandian	Wang et al. (2013)	54.16	0.12	3.19	0.26	6.07	0.12	34.89	0.39	0.05			99.25	91.108
HYS7	Opx	Kuandian	Wang et al. (2013)	53.91	0.11	3.1	0.17	6.56	0.14	34.53	0.38	0.03			98.93	90.3687
HYS13	Opx	Kuandian	Wang et al. (2013)	52.06	0.14	6.17	0.62	5.88	0.11	32.38	1.42	0.22			99	90.7546
HYS14	Opx	Kuandian	Wang et al. (2013)	54.94	0.06	3.39	0.36	6.06	0.15	34.25	0.52	0.06			99.79	90.9704
HYS24	Opx	Kuandian	Wang et al. (2013)	54.02	0.14	3.65	0.35	6.1	0.13	34.31	0.49	0.08			99.27	90.9306
HYS26	Opx	Kuandian	Wang et al. (2013)	53.63	0.16	4.69	0.3	6.31	0.14	33.23	0.68	0.08			99.22	90.3729
QYS8	Opx	Kuandian	Wang et al. (2013)	53.82	0.31	4.15	0.47	5.94	0.14	33.64	0.68	0.15			99.3	90.987
QYS10	Opx	Kuandian	Wang et al. (2013)	55.27	0.13	3.45	0.24	5.88	0.12	34.03	0.49	0.06			99.67	91.1632
QYS14	Opx	Kuandian	Wang et al. (2013)	55.62	0.32	4.15	0.42	6.42	0.15	31.89	0.67	0.06			99.7	89.8523
QYS15	Opx	Kuandian	Wang et al. (2013)	55.29	0.17	4.64	0.54	6.42	0.14	31.58	0.86	0.17			99.81	89.7629
QYS18	Opx	Kuandian	Wang et al. (2013)	55.15	0.07	4.54	0.43	6.8	0.13	31.38	0.86	0.13			99.49	89.161
KCT1	Opx	Kuandian	Liu (2014)	56.25	0.1	2.68	0.3	6.03	0.14	33.44	0.39	0.07	0.02	0.13	99.55	90.8133
KCT2	Opx	Kuandian	Liu (2014)	55.14	0.09	3.76	0.47	5.54	0.08	33.64	0.49	0.21	0.02	0.13	99.57	91.5426
KCT3	Opx	Kuandian	Liu (2014)	53.61	0.13	3.31	0.45	7.06	0.15	33.79	0.63	0.11	0.01	0.08	99.33	89.5085
KCT4	Opx	Kuandian	Liu (2014)	52.6	0.22	5.62	0.42	6.13	0.11	32.48	1.18	0.23	0.02	0.12	99.13	90.426
KCT5	Opx	Kuandian	Liu (2014)	52.65	0.22	5.7	0.41	6.01	0.1	32.86	1.12	0.22	0.01	0.14	99.44	90.6944
KCT6	Opx	Kuandian	Liu (2014)	52.51	0.21	5.67	0.42	5.93	0.13	32.85	1.08	0.19	0.01	0.14	99.14	90.8043
KHY1	Opx	Kuandian	Liu (2014)	53.65	0.12	3.91	0.25	6.19	0.14	34.24	0.49	0.01	0.07	0.11	99.18	90.7921
KHY2	Opx	Kuandian	Liu (2014)	54.08	0.07	3.39	0.23	6.41	0.15	34.47	0.35	0.04		0.07	99.26	90.5533
KHY3	Opx	Kuandian	Liu (2014)	53.42	0.15	3.97	0.28	6.06	0.13	34.51	0.45	0.04		0.1	99.11	91.0323
KHY4	Opx	Kuandian	Liu (2014)	54.24	0.07	3.49	0.4	5.93	0.14	34.29	0.54	0.07		0.12	99.29	91.1563
KHY5	Opx	Kuandian	Liu (2014)	49.87	0.37	8.57	0.06	8.58	0.12	29.62	1.84	0.17	0.01	0.13	99.34	86.0213
KHY6	Opx	Kuandian	Liu (2014)	54.24	0.07	3.49	0.4	5.93	0.14	34.29	0.54	0.07		0.12	99.29	91.1563
KHY7	Opx	Kuandian	Liu (2014)	54.92	0.08	2.66	0.22	5.87	0.15	34.75	0.36	0.01		0.1	99.12	91.3439
KHY8	Opx	Kuandian	Liu (2014)	53.71	0.15	4.45	0.28	6.26	0.14	33.32	0.67	0.13	0.01	0.11	99.23	90.4653
KQS1	Opx	Kuandian	Liu (2014)	53.61	0.3	4.11	0.43	5.98	0.14	33.64	0.75	0.19	0.03	0.14	99.32	90.9318
KQS2	Opx	Kuandian	Liu (2014)	56.52	0.11	3.36	0.23	6.45	0.16	32.34	0.47	0.07	0.02	0.11	99.84	89.9372
KQS3	Opx	Kuandian	Liu (2014)	55.6	0.33	4.2	0.39	6.4	0.13	31.65	0.72	0.1		0.13	99.65	89.8118
KQS4	Opx	Kuandian	Liu (2014)	55.07	0.21	3.74	0.33	6.22	0.15	32.99	0.61	0.13	0.02	0.12	99.59	90.4347
KQS5	Opx	Kuandian	Liu (2014)	55.6	0.22	3.78	0.31	6.43	0.14	31.99	0.59	0.08	0.01	0.12	99.27	89.8667
far-eastern Russia (FEE)
R42-5	Opx	Sviyagin	Guo et al. (2017)	54.95	0.11	4.84	0.38	6.31	0.14	31.86	0.6	0.05	0	0.09	99.34	90.0003
R42-6	Opx	Sviyagin	Guo et al. (2017)	55.87	0.07	3.64	0.61	5.4	0.13	32.83	0.63	0.05	0.01	0.1	99.34	91.5521
R42-7	Opx	Sviyagin	Guo et al. (2017)	54.95	0.11	4.58	0.33	6.3	0.14	31.77	0.59	0.04	0	0.09	98.92	89.9891
R42-8	Opx	Sviyagin	Guo et al. (2017)	55.81	0.11	3.87	0.29	6.15	0.14	32.67	0.42	0.04	0	0.08	99.59	90.4482
R42-9	Opx	Sviyagin	Guo et al. (2017)	55.03	0.12	4.94	0.38	6.12	0.13	31.64	0.69	0.11	0	0.09	99.23	90.2111
R42-10	Opx	Sviyagin	Guo et al. (2017)	55.51	0.11	4.24	0.28	6.34	0.14	32.24	0.47	0.04	0	0.07	99.44	90.0642
R42-11	Opx	Sviyagin	Guo et al. (2017)	54.88	0.11	4.61	0.34	6.28	0.15	31.67	0.74	0.06	0.01	0.08	98.94	89.9894
R42-12	Opx	Sviyagin	Guo et al. (2017)	54.81	0.1	4.32	0.32	6.28	0.14	31.66	0.63	0.05	0	0.07	98.39	89.9865
Sv-1	Opx	Sviyagin	Ionov et al. (2020)	55.4675	0.113	4.6565	0.38	6.4525	0.14	32.9715	0.593	0.065			100.839	90.1075
Sv-2	Opx	Sviyagin	Ionov et al. (2020)	54.9887	0.09	4.50867	0.383667	6.57633	0.138	32.455	0.581333	0.053			99.7747	89.7929
Sv-4	Opx	Sviyagin	Ionov et al. (2020)	55.3635	0.1015	4.27575	0.47125	6.28625	0.1295	32.829	0.6	0.0825			100.139	90.2998
Sv-7	Opx	Sviyagin	Ionov et al. (2020)	55.588	0.1075	4.04025	0.52225	6.02	0.1365	33.0708	0.58675	0.053			100.125	90.7342
Sv-8	Opx	Sviyagin	Ionov et al. (2020)	55.4353	0.122667	4.391	0.439667	6.387	0.146	32.9227	0.553667	0.0796667			100.478	90.1849
Sv-9	Opx	Sviyagin	Ionov et al. (2020)	54.9717	0.145667	4.74667	0.307333	6.89833	0.146333	32.5123	0.527	0.0813333			100.337	89.3632
Sv-12	Opx	Sviyagin	Ionov et al. (2020)	55.226	0.11525	4.39	0.3335	6.43775	0.11475	33.5548	0.5115	0.0825		0.04275	100.809	90.2828
Sv-13	Opx	Sviyagin	Ionov et al. (2020)	55.354	0.12375	4.2465	0.344	6.7045	0.13125	33.2257	0.47375	0.01625		0.059	100.679	89.8311
Sv-14	Opx	Sviyagin	Ionov et al. (2020)	55.2627	0.0733333	4.03	0.563	6.363	0.151667	32.7257	0.514	0.0315			99.7148	90.1651
Sv-15	Opx	Sviyagin	Ionov et al. (2020)	55.482	0.0906667	4.44333	0.413	6.38333	0.154333	33.2487	0.4615	0.063			100.74	90.2768
Sv-16	Opx	Sviyagin	Ionov et al. (2020)	55.261	0.1006	4.2068	0.2912	6.9418	0.1802	33.1244	0.4196	0.078		0.0334	100.637	89.4802
Sv-17	Opx	Sviyagin	Ionov et al. (2020)	55.266	0.0733333	4.82167	0.487333	6.27533	0.130333	32.953	0.743	0.13			100.88	90.348
Sv-18	Opx	Sviyagin	Ionov et al. (2020)	54.4103	0.146	5.48133	0.456	6.51833	0.117667	32.119	0.6155	0.076			99.9402	89.7787
Sv-19	Opx	Sviyagin	Ionov et al. (2020)	55.501	0.098	4.596	0.344667	6.35767	0.121	32.8213	0.465667	0.0573333			100.363	90.1984
Sv-20	Opx	Sviyagin	Ionov et al. (2020)	54.908	0.1315	4.0225	0.5315	6.084	0.151	33.984	0.533	0.105		0.0915	100.542	90.8734
Sv-21	Opx	Sviyagin	Ionov et al. (2020)	54.9915	0.1	4.5005	0.411	6.387	0.1855	32.7385	0.594	0.0575			99.9655	90.1352
Sv-22	Opx	Sviyagin	Ionov et al. (2020)	54.5155	0.126	4.797	0.314	6.6095	0.18	33.0475	0.6435	0.0625		0.0475	100.343	89.912
Sv-24	Opx	Sviyagin	Ionov et al. (2020)	54.674	0.1365	5.144	0.449	6.7245	0.1435	32.952	0.798	0.112		0.0715	101.205	89.7278
Sv-27	Opx	Sviyagin	Ionov et al. (2020)	55.3263	0.142333	4.049	0.336667	6.688	0.172667	33.7903	0.53	0.0743333		0.081	101.237	90.0061
Sv-28	Opx	Sviyagin	Ionov et al. (2020)	55.4267	0.18	4.50033	0.332667	6.564	0.136667	33.4803	0.599667	0.0893333		0.0696667	101.379	90.0912
Sv-29	Opx	Sviyagin	Ionov et al. (2020)	55.1323	0.154	4.95167	0.337	6.699	0.159	33.056	0.735667	0.105667		0.0783333	101.409	89.7917
Sv-32	Opx	Sviyagin	Ionov et al. (2020)	56.051	0.094	3.7408	0.6238	5.4726	0.1402	32.7894	0.663	0.0778		0.0582	99.7506	91.4386
Sv-36	Opx	Sviyagin	Ionov et al. (2020)	55.951	0.055	4.73	0.522	6.206	0.142	31.6955	0.7765	0.0525		0.0935	100.224	90.1028
Pod-1	Opx	Podgelban	Ionov et al. (2020)	56.6953	0.11	4.02933	0.387667	6.43567	0.143	32.133	0.544333	0.0673333		0.071	100.624	89.8992
Pod-2	Opx	Podgelban	Ionov et al. (2020)	56.3497	0.111	4.449	0.321333	6.69833	0.149333	31.9123	0.579333	0.0676667		0.0786667	100.724	89.4653
Pod-3	Opx	Podgelban	Ionov et al. (2020)	54.5743	0.150667	5.068	0.362667	6.92067	0.189667	31.765	0.787667	0.125333		0.114333	100.065	89.1088
Pod-4	Opx	Podgelban	Ionov et al. (2020)	54.582	0.146667	4.82067	0.360333	6.774	0.143667	32.1837	0.700333	0.111667		0.106333	99.9353	89.4392
Pod-5	Opx	Podgelban	Ionov et al. (2020)	56.628	0.104	3.976	0.3265	6.751	0.1585	32.044	0.5025	0.041		0.0845	100.623	89.4303
Opx, orthopyroxene. Mg# = 100×Mg/(Mg +Fetotal) molar.
References
Guo, P., Xu, W. L., Wang, C. G., Wang, F., Ge, W. C., Sorokin, A. A. & Wang, Z. W. (2017). Age and evolution of the lithospheric mantle beneath the Khanka Massif: geochemical and Re–Os isotopic evidence from Sviyagino mantle xenoliths. Lithos 282-283, 326-338.
Guo, P., Ionov, D. A., Xu, W. L., Wang, C. G. & Luan, J. P. (2020). Mantle and recycled oceanic crustal components in mantle xenoliths from northeastern china and their mantle sources. Journal of Geophysical Research: Solid Earth 125.
Ionov, D. A., Guo, P., Nelson, W. R., Shirey, S. B. & Willbold, M. (2020). Paleoproterozoic melt-depleted lithospheric mantle in the Khanka block, far eastern Russia: Inferences for mobile belts bordering the North China and Siberian cratons. Geochimica et Cosmochimica Acta 270, 95-111.
Hao, Y. T., Xia, Q. K., Jia, Z. B., Zhao, Q. C., Li, P., Feng, M. & Liu, S. C. (2016). Regional heterogeneity in the water content of the Cenozoic lithospheric mantle of Eastern China. Journal of Geophysical Research: Solid Earth 121, 517-537.
Lin, A. B., Zheng, J. P., Xiong, Q., Aulbach, S., Lu, J. G., Pan, S. K., Dai, H. K. & Zhang, H. (2019). A refined model for lithosphere evolution beneath the decratonized northeastern North China Craton. Contributions to Mineralogy and Petrology 174, 15.
Liu, J. L. (2014). Comparative study on nature of subcontinental lithosphere mantle in northeastern margin of the North China Craton and Northeast Orogenic Belt. Doctoral thesis. (In Chinese with English abstract)
Pan, S. K., Zheng, J. P., Chu, L. L. & Griffin, W. L. (2013). Coexistence of the moderately refractory and fertile mantle beneath the eastern Central Asian Orogenic Belt. Gondwana Research 23, 176-189.
Pan, S. K., Zheng, J. P., Griffin, W. L., Xu, Y. X. & Li, X. Y. (2015). Nature and evolution of the lithospheric mantle beneath the eastern Central Asian Orogenic Belt: Constraints from peridotite xenoliths in the central part of the Great Xing'an Range, NE China. Lithos 238, 52-63.
Park, K., Choi, S. H., Cho, M. & Lee, D. C. (2017). Evolution of the lithospheric mantle beneath Mt. Baekdu (Changbaishan): Constraints from geochemical and Sr–Nd–Hf isotopic studies on peridotite xenoliths in trachybasalt. Lithos 286, 330-344.
Song, Y., Wang, J., Liu, J. L., Xie, Z. P. & Hattori, K. H. (2013). Mineral chemistry of mantle xenoliths in Cenozoic basalts from Wangqing, eastern Jilin: implications for formation of newly accreted sub-continental mantle earth. Science Frontiers 20, 96-107. (In Chinese with English abstract)
Tang, Y. J., Zhang, H. F., Deloule, E., Su, B. X., Ying, J. F., Xiao, Y. & Hu, Y. (2012). Slab-derived lithium isotopic signatures in mantle xenoliths from northeastern North China Craton. Lithos 149, 79-90.
Tian, G. C., Liu, J. G., Scott, J. M., Chen, L. H., Pearson, D. G., Chu, Z. Y., Wang, Z. C. & Luo Y. (2020). Architecture and evolution of the lithospheric roots beneath circum-cratonic orogenic belts–the Xing’an Mongolia Orogenic Belt and its relationship with adjacent North China and Siberian cratonic roots. Lithos (submitted).
Wang, J., Hattori, K. H. & Xie, Z. P. (2013). Oxidation state of lithospheric mantle along the northeastern margin of the North China Craton: implications for geodynamic processes. International Geology Review 55, 1418-1444.
Wu, F. Y., Walker, R. J., Yang, Y. H., Yuan, H. L. & Yang, J. H. (2006). The chemical-temporal evolution of lithospheric mantle underlying the North China Craton. Geochimica et Cosmochimica Acta 70, 5013-5034.
Xu, Q. H., Liu, J. Q., He, H. Y. & Zhang, Y. H. (2019). Nature and evolution of the lithospheric mantle revealed by water contents and He-Ar isotopes of peridotite xenoliths from Changbaishan and Longgang basalts in Northeast China. Science Bulletin 64, 1325-1335.
Xu, Q. H., Liu, J. Q., Mo, X. X., He, H. Y., Zhang, Y. H. & Zhao, W. B. (2020). Characteristics of the lithospheric mantle revealed by peridotite xenoliths from Changbaishan volcanic rocks. Acta Petrologica Sinica 36, 2047-2066. (In Chinese with English abstract)
Xu, Y. G., Ross, J. V. & Mercier, J. C. C. (1993). The upper mantle beneath the continental rift of Tanlu, Eastern China: evidence for the intra-lithospheric shear zones. Tectonophysics 225, 337-360.
Xu, Y. G., Menzies, M. A., Vroon, P., Mercier, J. C. & Lin, C. Y. (1998). Texture–temperature–geochemistry relationships in the upper mantle as revealed from spinel peridotite xenoliths from Wangqing, NE China. Journal of Petrology 39, 469-493.
Xu, Y. G., Menzies, M. A., Thirlwall, M. F., Huang, X. L., Liu, Y. & Chen, X. M. (2003). “Reactive” harzburgites from Huinan, NE China: products of the lithosphere-asthenosphere interaction during lithospheric thinning? Geochimica et Cosmochimica Acta 67, 487-505.
Yu, S. Y., Xu, Y. G., Huang, X. L., Ma, J. L., Ge, W. C., Zhang, H. H. & Qin, X. F. (2009). Hf–Nd isotopic decoupling in continental mantle lithosphere beneath Northeast China: effects of pervasive mantle metasomatism. Journal of Asian Earth Sciences 35, 554-570.
Zhang, M., Yang, J. H., Sun, J. F., Wu, F. Y. & Zhang, M. (2012). Juvenile subcontinental lithospheric mantle beneath the eastern part of the Central Asian Orogenic Belt. Chemical Geology 328, 109-122.
Zhang, Y. L (2011). Isotopic compositions of the peridotite xenoliths and age of the subcontinental lithospheric mantle in the Great Xing'an Range. Doctoral thesis. (In Chinese with English abstract)
Zhang, Y. L., Liu, C. Z., Ge, W. C., Wu, F. Y. & Chu, Z. Y. (2011). Ancient sub-continental lithospheric mantle (SCLM) beneath the eastern part of the Central Asian Orogenic Belt (CAOB): Implications for crust–mantle decoupling. Lithos 126, 233-247.
Zhang, Y. L., Ge, W. C., Sun, J., Yang, H., Liu, Z. C. & Liu, J. G. (2019). Age and composition of the subcontinental lithospheric mantle beneath the Xing'an–Mongolia Orogenic Belt: Implications for the construction of microcontinents during accretionary orogenesis. Lithos 326, 556-571.
Zhao, Y. W. & Fan, Q. C. (2011). Characteristics of lithospheric mantle beneath the Great Xing'an Range: evidence from spinel peridotite xenoliths in the Halaha River and Chaoer River area. Acta Petrologica Sinica 27, 2833-2841. (In Chinese with English abstract)
Zhou, Q., Wu, F. Y., Chu, Z. Y., Yang, Y. H., Sun, D. Y. & Ge, W. C. (2007). Sr-Nd-Hf-Os isotopic characterizations of the Jiaohe peridotite xenoliths in Jilin province and constraints on the lithospheric mantle age in northeastern China. Acta Petrologica Sinica 23, 1269-1280. (In Chinese with English abstract)
Zhou, Q., Wu, F. Y., Chu, Z. Y. & Ge, W. C. (2010). Isotopic compositions of mantle xenoliths and age of the lithospheric mantle in Yitong, Jilin Province. Acta Petrologica Sinica 26, 1241-1264. (In Chinese with English abstract)

## Sheet: Ref. Cpx
Sample	Mineral	Locality	Reference	SiO2	TiO2	Al2O3	Cr2O3	FeO	MnO	MgO	CaO	Na2O	K2O	NiO	Total	Mg#
northwestern NEC
KL3-10	Cpx	Keluo	Zhang et al. (2011)	52.4107	0.290667	4.13533	1.05767	2.125	0.0666667	15.636	22.8163	0.865	0.0113333	0.035	99.4497	92.916
KL3-24	Cpx	Keluo	Zhang et al. (2011)	52.3275	0.41225	3.92325	1.224	2.14225	0.08375	15.6387	22.296	1.0485	0.003	0.02425	99.1235	92.8637
KL3-26	Cpx	Keluo	Zhang et al. (2011)	51.75	0.360667	5.14167	0.817333	2.50367	0.053	14.9513	22.503	1.14533	0.00966667	0.0326667	99.2683	91.4126
KL3-27-1	Cpx	Keluo	Zhang et al. (2011)	50.313	0.897667	5.29767	0.883667	2.46833	0.0736667	14.7707	22.4557	1.30933	0.047	0.0113333	98.528	91.4288
KL3-27-2	Cpx	Keluo	Zhang et al. (2011)	50.1374	0.822	6.4656	1.4858	4.108	0.1146	15.8808	17.9748	1.4944	0.0098	0.0318	98.525	87.3274
KL3-28	Cpx	Keluo	Zhang et al. (2011)	51.8857	0.475	5.45667	0.63	2.53333	0.0906667	15.1467	22.4803	1.05033	0.0136667	0.024	99.7863	91.422
KL3-30	Cpx	Keluo	Zhang et al. (2011)	53.4435	0.157223	2.61859	1.18338	2.27149	0.07272	15.9853	22.4254	1.17126	0.01212	0.0380433	99.3789	92.6169
KL3-31	Cpx	Keluo	Zhang et al. (2011)	51.602	0.451333	4.98033	0.806667	2.394	0.078	14.8737	22.2973	1.042	0	0.029	98.5543	91.7183
KL3-38	Cpx	Keluo	Zhang et al. (2011)	51.9041	0.321417	4.68253	0.966618	2.53885	0.0693583	15.2483	22.6365	1.01263	0.0216533	0.013195	99.4152	91.4574
KL3-40	Cpx	Keluo	Zhang et al. (2011)	54.5577	0.505	0.75875	0.92375	3.831	0.1505	19.8717	18.7413	0.52575	0.01475	0.0475	99.9278	90.2403
KL3-41	Cpx	Keluo	Zhang et al. (2011)	51.925	0.34325	4.9305	0.73125	2.24925	0.08275	15.4178	22.6743	0.82675	0.00375	0.022	99.2065	92.435
KL3-49	Cpx	Keluo	Zhang et al. (2011)	52.548	0.1935	3.7615	1.154	2.073	0.058	15.805	22.7615	0.9545	0.014	0.0425	99.3655	93.1463
KL3-53	Cpx	Keluo	Zhang et al. (2011)	53.0557	0.1135	2.83325	0.99875	2.00925	0.0705	16.508	23.1375	0.65325	0.01275	0.024	99.4165	93.6084
KL3-56	Cpx	Keluo	Zhang et al. (2011)	50.9993	0.520333	5.64067	0.718	2.55067	0.08	14.466	22.5417	1.10467	0	0.047	98.6683	90.9988
08KL-01	Cpx	Keluo	Zhang et al. (2011)	52.6777	0.384333	5.07667	1.02567	2.549	0.084	14.9907	22.9007	1.15	0.00633333	0.0436667	100.889	91.2916
08KL-02	Cpx	Keluo	Zhang et al. (2011)	53.737	0.194	1.80175	1.52275	2.62625	0.08575	18.4405	20.5512	0.82	0.01875	0.0525	99.8505	92.6016
08KL-03	Cpx	Keluo	Zhang et al. (2011)	52.3643	0.71325	6.3385	0.69925	2.72425	0.064	14.476	22.3817	1.40125	0.0065	0.051	101.22	90.4508
08KL-04	Cpx	Keluo	Zhang et al. (2011)	51.7942	0.539	5.2595	0.577	2.50725	0.05675	15.1627	23.6547	0.89625	0.00725	0.0555	100.51	91.5111
08KL-05	Cpx	Keluo	Zhang et al. (2011)	52.9427	0.367333	4.858	0.998333	2.72133	0.0693333	15.7203	22.0053	1.319	0.0123333	0.0386667	101.053	91.1483
08KL-07	Cpx	Keluo	Zhang et al. (2011)	52.0895	0.446	3.24225	1.03675	2.15075	0.0286667	16.361	23.5085	0.65525	0.03475	0.029	99.5824	93.1319
08KL-09	Cpx	Keluo	Zhang et al. (2011)	51.0516	0.592	6.2924	0.5488	3.2024	0.0988	15.299	21.2882	1.153	0.0068	0.0436	99.5766	89.4913
08KL-10	Cpx	Keluo	Zhang et al. (2011)	50.6615	0.573	6.1425	0.727	2.8755	0.0705	14.596	22.3708	1.2965	0.01025	0.05325	99.3768	90.048
08KL-11	Cpx	Keluo	Zhang et al. (2011)	52.5067	0.877333	3.89367	1.48533	2.27633	0.0936667	15.4587	22.5627	1.31467	0.00966667	0.044	100.523	92.3695
08KL-12	Cpx	Keluo	Zhang et al. (2011)	51.8905	0.359	4.7525	0.9425	2.745	0.1275	15.667	22.3525	0.928	0	0.019	99.7835	91.0505
08KL-13	Cpx	Keluo	Zhang et al. (2011)	52.8513	0.31275	3.1525	1.3165	2.37675	0.0345	16.4833	22.1348	1.01925	0.0125	0.0155	99.7095	92.5163
09NMB33		Nuomin	Hao et al. (2016)
09NMB36		Nuomin	Hao et al. (2016)
09NMB37	Cpx	Nuomin	Hao et al. (2016)	53.8	0.13	2.88	1.2	2.72	0.08	17.19	20.5	1.2	0.01	0.06	99.77	91.847
09NMB38		Nuomin	Hao et al. (2016)
09NMB40		Nuomin	Hao et al. (2016)
09NMB41	Cpx	Nuomin	Hao et al. (2016)	52.85	0.06	4.02	1.21	2.79	0.06	17.24	20.88	0.86	0.01	0.05	100.03	91.6769
09NMB42		Nuomin	Hao et al. (2016)
09NMB49	Cpx	Nuomin	Hao et al. (2016)	52.47	0.6	4.5	0.97	2.98	0.07	16.83	20.53	0.97	0	0.04	99.96	90.9643
NM2-01	Cpx	Nuomin	Zhang et al. (2019)	52.36	0.23	3.2	0.79	2.66	0.1	17.53	21.53	0.34	0.01	0.04	98.8	92.1553
NM2-02	Cpx	Nuomin	Zhang et al. (2019)	53.18	0.13	3.27	0.77	2.67	0.11	17.68	21.56	0.41	0.02	0.04	99.83	92.1897
NM2-04	Cpx	Nuomin	Zhang et al. (2019)	52.65	0.49	4.57	1.42	2.98	0.12	16.93	19.48	1.3	0.01	0.05	100.01	91.0129
NM2-07	Cpx	Nuomin	Zhang et al. (2019)	51.55	0.87	5.07	1.38	3.45	0.14	16.25	19.78	1.36	0.02	0.12	100	89.3573
NM2-20	Cpx	Nuomin	Zhang et al. (2019)	52.14	0.59	7.29	0.88	2.59	0.1	13.74	20.81	2.09	0.01	0.04	100.28	90.4365
NM2-23	Cpx	Nuomin	Zhang et al. (2019)	52.76	0.21	3.45	1.06	2.79	0.08	17.4	20.68	0.69	0.02	0.06	99.21	91.7471
NM2-24	Cpx	Nuomin	Zhang et al. (2019)	53.25	0.08	3.67	1.18	2.6	0.09	17.25	20.5	0.9	0.01	0.08	99.62	92.2037
NM2-27	Cpx	Nuomin	Zhang et al. (2019)	52.02	0.64	3.89	1.26	3.95	0.17	18.62	18.33	0.54	0.02	0.04	99.48	89.3649
NM2-29	Cpx	Nuomin	Zhang et al. (2019)	51.93	0.43	4.46	1.31	3.11	0.1	16.5	19.27	1.24	0.01	0.07	98.42	90.4373
NM2-34	Cpx	Nuomin	Zhang et al. (2019)	52.99	0.04	3.43	1.12	2.69	0.08	17.58	20.43	0.76	0.02	0.05	99.16	92.0946
NM2-37	Cpx	Nuomin	Zhang et al. (2019)	52.31	0.57	4.85	1.05	2.88	0.1	16.63	20.19	1.01	0.01	0.03	99.64	91.145
NM2-39	Cpx	Nuomin	Zhang et al. (2019)	51.68	0.66	7.05	0.9	2.33	0.13	14.06	20.8	2.09		0.04	99.75	91.4941
NM2-48	Cpx	Nuomin	Zhang et al. (2019)	52.62	0.12	4.36	1.21	2.89	0.1	16.86	19.83	1.11	0.01	0.05	99.14	91.2275
NM2-50	Cpx	Nuomin	Zhang et al. (2019)	52.92	0.13	4.28	1.16	2.7	0.1	16.97	20.28	0.92	0.01	0.05	99.5	91.8057
NM2-51	Cpx	Nuomin	Zhang et al. (2019)	52.41	0.22	4.22	1.1	2.93	0.08	16.86	20.07	0.99	0.01	0.05	98.94	91.1169
NM2-55	Cpx	Nuomin	Zhang et al. (2019)	51.87	0.47	5.66	0.91	2.39	0.08	15.09	20.66	1.54		0.03	98.7	91.8399
NM2-56	Cpx	Nuomin	Zhang et al. (2019)	52.83	0.02	3.22	0.92	2.79	0.07	18.06	21.12	0.32	0.01	0.05	99.42	92.0247
BLS01A		Nuomin	Tian et al. (2020)
BLS02A		Nuomin	Tian et al. (2020)
BLS02B		Nuomin	Tian et al. (2020)
BLS03		Nuomin	Tian et al. (2020)
BLS06B		Nuomin	Tian et al. (2020)
BLS07		Nuomin	Tian et al. (2020)
BLS09	Cpx	Nuomin	Tian et al. (2020)	53.2167	0.203333	3.77	1.34333	3.04667	0.0866667	17.12	20.59	1.01	0.0233333	0.09	100.5	90.9228
BLS10	Cpx	Nuomin	Tian et al. (2020)	53.05	0.202	4.424	1.048	2.772	0.118	16.674	19.936	1.228	0.015	0.0675	99.5345	91.4693
BLS12A		Nuomin	Tian et al. (2020)
BLS16		Nuomin	Tian et al. (2020)
BLS18		Nuomin	Tian et al. (2020)
BLS19	Cpx	Nuomin	Tian et al. (2020)	53.655	0.13	4.09167	1.24833	3.105	0.106667	16.8517	20.675	0.923333	0.0175	0.08	100.884	90.6318
BLS20		Nuomin	Tian et al. (2020)
BLS21	Cpx	Nuomin	Tian et al. (2020)	52.7	0.94	3.59	2.24	4.01	0.14	17.46	18.19	1.05	0.04	0.03	100.39	88.5863
BLS24		Nuomin	Tian et al. (2020)
BLS25		Nuomin	Tian et al. (2020)
BLS27		Nuomin	Tian et al. (2020)
BLS29	Cpx	Nuomin	Tian et al. (2020)	53.17	0.465	5.28	1.58	3.395	0.095	16.02	17.905	1.8	0.02	0.115	99.845	89.3745
BLS30		Nuomin	Tian et al. (2020)
BLS31		Nuomin	Tian et al. (2020)
BLS33		Nuomin	Tian et al. (2020)
BLS34	Cpx	Nuomin	Tian et al. (2020)	52.47	0.08	3.38	1.25	2.65	0.06	17.46	20.66	0.68	0.02	0.08	98.79	92.1536
BLS35A		Nuomin	Tian et al. (2020)
BLS38A	Cpx	Nuomin	Tian et al. (2020)	53.49	0.1	4.34	1.18	3.12	0.06	17.38	20.17	1.01	0	0.04	100.89	90.8506
BLS39A		Nuomin	Tian et al. (2020)
BLS40		Nuomin	Tian et al. (2020)
NMH01		Nuomin	Tian et al. (2020)
NMH03	Cpx	Nuomin	Tian et al. (2020)	53.215	0.49	4.9475	1.3825	3.2225	0.0975	16.01	19.34	1.6975	0.01	0.1025	100.515	89.854
NMH04	Cpx	Nuomin	Tian et al. (2020)	53.2925	0.59	4.505	1.3125	3.2025	0.11	16.2675	19.97	1.3875	0.02	0.08	100.738	90.0544
NMH06	Cpx	Nuomin	Tian et al. (2020)	53.376	0.184	3.732	1.43	3.248	0.116	16.704	19.632	1.06	0.018	0.1125	99.6125	90.1647
NMH09		Nuomin	Tian et al. (2020)
XSFS01		Nuomin	Tian et al. (2020)
XSFS06		Nuomin	Tian et al. (2020)
XSFS07		Nuomin	Tian et al. (2020)
CH01-01	Cpx	Halaha	Zhang (2011)	51.98	0.14	5.02	1.32	3.68	0.14	18.71	19.16	0.32	0.02	0.07	100.56	90.0625
CH01-02	Cpx	Halaha	Zhang (2011)	52.06	0.75	5.58	1.13	4.32	0.05	16.57	17.8	1.5	0.03	0.06	99.85	87.2404
CH01-04	Cpx	Halaha	Zhang (2011)	53.7	1.09	1.18	1.7	2.8	0.07	18.01	20.1	1.17	0.04	0.06	99.92	91.9779
CH01-05	Cpx	Halaha	Zhang (2011)	52.53	0.52	4.69	1.17	3.32	0.09	17.06	19.73	1.06	0	0.09	100.26	90.1572
CH01-07	Cpx	Halaha	Zhang (2011)	52.29	0.41	6.64	1.23	2.3	0.11	14.18	21.53	1.96	0.02	0.06	100.73	91.6596
CH01-08	Cpx	Halaha	Zhang (2011)	52.3	0.15	4.79	1.58	3.57	0.11	18.66	18.45	0.68	0.02	0.06	100.37	90.3075
CH01-09	Cpx	Halaha	Zhang (2011)	53.6	0.31	5.58	1.21	2.21	0.05	14.75	21.98	1.63	0.01	0.03	101.36	92.2463
CH01-10	Cpx	Halaha	Zhang (2011)	52.54	0.03	5.14	1.47	3.62	0.13	18.81	17.68	0.73	0.05	0.08	100.28	90.2557
CH01-11	Cpx	Halaha	Zhang (2011)	54.06	0.37	1.22	1.52	4.19	0.15	18.21	19.98	0.81	0.01	0.05	100.57	88.5676
CH02-01	Cpx	Halaha	Zhang (2011)	52.54	0.24	4.04	1.81	3.1	0.11	17.17	19.05	1.39	0.03	0.08	99.56	90.8029
CH02-04	Cpx	Halaha	Zhang (2011)	52.68	0.15	4.57	1.56	4.04	0.11	18.51	17.27	0.95	0.01	0.06	99.91	89.0914
CH02-05	Cpx	Halaha	Zhang (2011)	52.25	0.16	5.32	1.4	3.79	0.14	18.65	17.41	0.9	0.01	0.06	100.09	89.7663
03CH-01	Cpx	Halaha	Zhang (2011)	52.32	0.13	5.82	1.23	3.74	0.15	18.66	16.27	1.1	0.02	0.07	99.51	89.8926
03CH-02	Cpx	Halaha	Zhang (2011)	52.75	0.2	5.71	1.05	4.6	0.1	21.68	12.73	0.94	0.02	0.1	99.88	89.3631
03CH-03	Cpx	Halaha	Zhang (2011)	52.04	0.3	5.49	0.95	4.05	0.13	18.36	17.56	0.04	0.02	0.03	98.97	88.9879
03CH-04	Cpx	Halaha	Zhang (2011)	52.43	0.14	5.28	1.35	3.63	0.13	18.85	16.98	0.85	0.02	0.06	99.72	90.2501
03CH-05	Cpx	Halaha	Zhang (2011)	52.3	0.55	6.34	1.15	2.56	0.1	15.56	19.76	1.77	0	0.05	100.14	91.5502
03CH-06	Cpx	Halaha	Zhang (2011)	52.39	0.3	5.98	1.22	3.94	0.14	18.75	15.67	1.27	0.02	0.06	99.74	89.4548
03CH-07	Cpx	Halaha	Zhang (2011)	52.18	0.09	3.69	1.65	3.36	0.13	18.17	18.88	0.83	0.02	0.06	99.06	90.6011
03CH-08	Cpx	Halaha	Zhang (2011)	52.2	0.28	4.77	1.52	3.33	0.11	17.95	18.53	0.83	0.02	0.09	99.63	90.5737
03CH-10	Cpx	Halaha	Zhang (2011)	53.13	0.17	3.46	1.46	2.29	0.07	17.43	20.7	0.98	0.01	0.07	99.77	93.1355
03CH-13	Cpx	Halaha	Zhang (2011)	52.72	0.39	3.41	1.67	3.33	0.12	18.55	18.2	0.91	0.02	0.06	99.38	90.8507
03CH-15	Cpx	Halaha	Zhang (2011)	52.46	0.28	5.33	1.29	4.25	0.15	19.26	16.2	0.94	0.01	0.1	100.27	88.9845
GW04226	Cpx	Halaha	Zhang (2011)	52.38	0.39	6.46	0.75	2.43	0.12	14.64	21.45	1.76	0.01	0.03	100.42	91.4816
GW04227	Cpx	Halaha	Zhang (2011)	52.01	0.44	6.66	1	4.02	0.14	17.58	16.68	1.48	0	0.04	100.05	88.6303
GW04229	Cpx	Halaha	Zhang (2011)	52.26	0.43	6.65	1.09	3.98	0.13	17.22	16.43	1.52	0.02	0.07	99.8	88.5222
GW04240	Cpx	Halaha	Zhang (2011)	52.48	0.09	4.16	1.15	3.29	0.1	18.49	19.67	0.3	0.02	0.06	99.81	90.924
07DLH04	Cpx	Halaha	Zhao & Fan (2011)	51.07	1.07	2.75	0.5	7.66	0.2	16.13	20.57	0.4	0	0.06	100.41	78.9633
07DLH05	Cpx	Halaha	Zhao & Fan (2011)	52.96	0.06	4.1	1.81	3.07	0.1	17.79	18.96	1.06	0	0.03	99.93	91.1735
07HXD01	Cpx	Halaha	Zhao & Fan (2011)	51.96	0.05	3.24	1.45	3.36	0.1	19.24	18.93	0.49	0.02	0.07	98.92	91.0772
07HXD03	Cpx	Halaha	Zhao & Fan (2011)	51.87	0.14	5.06	1.82	3.09	0.1	17.52	17.49	1.59	0.01	0.07	98.76	90.9966
07HXD05	Cpx	Halaha	Zhao & Fan (2011)	50.28	2.41	13.66	0.07	10.59	0.16	6.75	11.46	2.1	1.91	0	99.39	53.1876
07TFL01		Halaha	Zhao & Fan (2011)
07TFL03	Cpx	Halaha	Zhao & Fan (2011)	52.99	0.01	1.9	2.61	2.48	0.11	18.33	19.53	1.28	0	0.03	99.26	92.9454
08TFL02	Cpx	Halaha	Zhao & Fan (2011)	52.49	0.44	5.27	1.65	2.11	0.08	14.46	21.21	1.91	0.01	0.04	99.67	92.4334
08TFL07	Cpx	Halaha	Zhao & Fan (2011)	53.67	0.05	2.27	1.11	1.52	0.09	16.33	23.11	0.96	0.02	0.05	99.18	95.0374
07WNP01	Cpx	Halaha	Zhao & Fan (2011)	51.36	0.42	6.39	1.05	2.67	0.14	15.64	19.6	1.79	0.01	0.06	99.13	91.26
07WNP07	Cpx	Halaha	Zhao & Fan (2011)	52.53	0.08	4.37	1.22	3.55	0.11	18.11	19.23	0.41	0.01	0.07	99.67	90.0927
07TFL04	Cpx	Halaha	Zhao & Fan (2011)	51.01	0.58	6.46	0.85	2.22	0.09	14.04	21.66	1.95	0	0.06	98.91	91.8523
07TFL06	Cpx	Halaha	Zhao & Fan (2011)	51.49	0.32	6.21	0.87	2.33	0.07	14.47	22.56	1.56	0	0.1	99.99	91.7151
07DCH01	Cpx	Halaha	Zhao & Fan (2011)	52.66	0.6	6.86	0.91	2.3	0.08	14.28	21.49	2.19	0.01	0.04	101.41	91.7132
07DCH02	Cpx	Halaha	Zhao & Fan (2011)	52.43	0.48	6.92	0.89	2.31	0.1	14.28	21.46	2.09	0	0.06	101.02	91.6801
08WNP08	Cpx	Halaha	Zhao & Fan (2011)	51.69	0.1	4.76	1.19	3.77	0.1	18.33	18.75	0.38	0	0.11	99.17	89.6554
08TFL06	Cpx	Halaha	Zhao & Fan (2011)	51.45	0.6	6.8	0.74	2.87	0.08	15.6	19.08	1.74	0.01	0.04	99.01	90.6447
TFL-04	Cpx	Halaha	Liu (2014)	52.05	0.34	5.77	1.16	2.07	0.08	14.38	20.35	1.94	0.05		98.19	92.5279
TFL-07	Cpx	Halaha	Liu (2014)	53.39		3.05	1.22	1.63	0.09	16.49	21.69	0.81			98.37	94.7461
0098-10-1	Cpx	Halaha	Liu (2014)	52.13	0.37	5.79	0.95	3.83	0.1	18.04	15.95	1.31	0.03		98.5	89.3573
0098-10	Cpx	Halaha	Liu (2014)	52.86	0.25	4.76	1.34	2	0.12	15.28	20.64	1.69			98.94	93.1594
0098-13	Cpx	Halaha	Liu (2014)	53.12		3.61	1.28	3.55	0.09	19.21	17.82	0.55			99.23	90.6067
0098-19	Cpx	Halaha	Liu (2014)	53.67		3.95	1.46	2.15	0.08	15.36	20.81	1.59			99.07	92.7193
TXT-04	Cpx	Halaha	Liu (2014)	52.18	0.21	4.83	1.42	3.12	0.09	16.53	18.34	1.51			98.23	90.4252
TFL-08	Cpx	Halaha	Liu (2014)	54.76	0.25	4.52	1.21	2.8	0.09	15.03	19.11	2.1			99.87	90.5379
0098-06	Cpx	Halaha	Liu (2014)	51.46	0.71	6.03	0.63	2.62	0.05	14.14	20.75	1.78	0.02		98.19	90.5841
0098-15	Cpx	Halaha	Liu (2014)	53.19	0.53	5.96	0.59	2.44	0.06	14.32	20.51	1.77			99.37	91.2752
0098-17	Cpx	Halaha	Liu (2014)	51.06	0.71	6.98	0.54	2.79	0.04	14.17	20.32	1.77			98.38	90.053
TXT-02	Cpx	Halaha	Liu (2014)	54.47	0.35	4.58	1.46	3.98	0.04	16.55	17.82	1.6			100.85	88.1127
AS01	Cpx	Halaha	Pan et al. (2015)	52.3662	0.6176	6.48	0.6706	2.4628	0.062	14.1966	21.1528	1.7572	0.003	0.0446	99.813	91.1311
AS02	Cpx	Halaha	Pan et al. (2015)	52.9472	0.3422	5.5292	1.2158	2.1034	0.041	14.5948	21.3918	1.6716	0.0048	0.0162	99.857	92.5198
AS03	Cpx	Halaha	Pan et al. (2015)	53.1653	0.361	5.84225	0.9865	3.35225	0.06675	16.1258	18.5823	1.76725	0.0035	0.06275	100.315	89.556
AS04	Cpx	Halaha	Pan et al. (2015)	51.947	0.5434	6.197	1.0242	3.5934	0.0562	16.6918	18.3522	1.3614	0.0058	0.0716	99.8434	89.2244
AS05	Cpx	Halaha	Pan et al. (2015)	51.7147	0.6665	6.098	1.14925	3.56	0.05825	16.5538	18.2133	1.432	0.004	0.07325	99.523	89.2343
AS07	Cpx	Halaha	Pan et al. (2015)	53.012	0.0736667	3.05567	1.51033	3.67033	0.075	19.8087	17.9483	0.323333	0.012	0.0966667	99.5863	90.5841
DHG01	Cpx	Halaha	Pan et al. (2015)	51.427	0.745	5.7105	1.1475	3.8165	0.0455	15.332	19.032	1.562	0.0065	0.06	98.8825	87.7467
DHG02	Cpx	Halaha	Pan et al. (2015)	51.874	0.7364	5.578	1.0328	3.8918	0.0578	15.637	19.1016	1.5914	0.009	0.0662	99.5764	87.7484
DHG04	Cpx	Halaha	Pan et al. (2015)	52.6628	0.3356	6.3	1.0942	3.759	0.0614	17.3276	16.9468	1.4684	0.0182	0.0502	100.024	89.1504
DHG09	Cpx	Halaha	Pan et al. (2015)	53.8384	0.0442	2.8642	0.9358	2.4322	0.0658	16.5034	21.8414	0.8942	0.0022	0.0508	99.4722	92.3637
DHG11		Halaha	Pan et al. (2015)
DHG12	Cpx	Halaha	Pan et al. (2015)	52.5968	0.1315	4.686	1.521	3.496	0.06975	18.2583	17.7475	0.86175	0.01175	0.08975	99.4703	90.3003
DHG13	Cpx	Halaha	Pan et al. (2015)	52.8756	0.1456	4.7204	1.5666	3.452	0.0672	18.2334	18.019	0.889	0.008	0.0662	100.043	90.3988
DHG05	Cpx	Halaha	Pan et al. (2015)	52.8954	0.0594286	3.69286	1.42657	3.39914	0.07	18.8597	19.0836	0.332429	0.131714	0.0432857	99.9943	90.8175
DHG14	Cpx	Halaha	Pan et al. (2015)	52.3418	0.0298	4.63	1.4856	3.623	0.0676	19.1964	18.0314	0.395	0.008	0.0512	99.8598	90.4259
A2-2	Cpx	Abaga	Zhang et al. (2012)	52.5	0.33	5.93	0.95	2.3	0.07	14.4	21.4	1.62		0.02	99.52	91.7765
A2-1	Cpx	Abaga	Zhang et al. (2012)	53.6	0.05	2.8	0.8	2.71	0.07	17.3	22.5	0.25		0.06	100.14	91.9221
A2-10	Cpx	Abaga	Zhang et al. (2012)	53.3	0.41	5.81	0.81	3.38	0.08	18.1	17	1.42		0.05	100.36	90.5174
A2-11	Cpx	Abaga	Zhang et al. (2012)	53	0.43	6.09	0.92	2.49	0.09	14.5	20.8	1.85		0.03	100.2	91.2129
ABG08	Cpx	Abaga	Zhang et al. (2012)	51.8	0.45	6.33	0.94	2.46	0.09	14	20.6	1.87		0.03	98.57	91.0271
ABG05-1	Cpx	Abaga	Zhang et al. (2012)	53.6	0.17	3.75	1.04	2.08	0.07	16.1	23.1	0.71		0.04	100.66	93.2422
ABG06-1	Cpx	Abaga	Zhang et al. (2012)	53.4	0.06	4.41	0.94	2.26	0.06	15.6	22.5	0.98		0.04	100.25	92.4837
ABG07-1	Cpx	Abaga	Zhang et al. (2012)	53.2	0.04	3.21	0.91	3.12	0.1	17.7	20.6	0.29		0.05	99.22	91.0012
XLHT1	Cpx	Abaga	Pan et al. (2013)	52.5	0.42	4.05	1.82	2.99	0.11	17	18.8	1.39	0.02		99.1	91.0192
XLHT2a	Cpx	Abaga	Pan et al. (2013)	53.2	0.09	3.93	1.07	2.9	0.08	17.4	20	1.13	0.01		99.81	91.4496
XLHT2b	Cpx	Abaga	Pan et al. (2013)	52.4	0.07	3.74	1.04	2.8	0.11	16.6	19.7	1.11	0.01		97.58	91.3555
XLHT3	Cpx	Abaga	Pan et al. (2013)	52.3	0.63	5.62	1.43	3.71	0.09	15.6	18.6	1.84	0.01		99.83	88.2289
XLHT4	Cpx	Abaga	Pan et al. (2013)	51.3	0.65	7.15	0.78	4.01	0.11	15.4	18	1.75	0.01		99.16	87.2542
XLHT9	Cpx	Abaga	Pan et al. (2013)	53.7	0.35	4.68	1.75	3.23	0.09	16	18	2.26	0.01		100.07	89.827
XLHT10	Cpx	Abaga	Pan et al. (2013)	54.2	0.03	2.42	0.94	2.75	0.08	17.8	21.4	0.51	0.01		100.14	92.0242
XLHT11	Cpx	Abaga	Pan et al. (2013)	53.6	0.02	2.54	0.96	2.65	0.08	17.8	21.4	0.49	0.01		99.55	92.2919
XLHT12	Cpx	Abaga	Pan et al. (2013)	51.4	1.13	6.15	1.26	3.89	0.12	15.6	18.1	1.75	0.01		99.41	87.7279
XLHT13	Cpx	Abaga	Pan et al. (2013)	53.2	0.2	4.38	1.39	3.05	0.09	16.2	18.8	1.81	0.01		99.13	90.4471
XLHT14	Cpx	Abaga	Pan et al. (2013)	52.9	0.37	5.53	1.08	2.14	0.09	14.8	21.6	1.57	0.01		100.09	92.497
XLHT15	Cpx	Abaga	Pan et al. (2013)	53.5	0.13	4.42	1.7	3.12	0.09	16.4	19	1.6	0.01		99.97	90.3566
XLHT17	Cpx	Abaga	Pan et al. (2013)	52.4	0.48	6.36	0.85	2.57	0.1	14.3	20.9	1.88	0.01		99.85	90.8412
XLHT18	Cpx	Abaga	Pan et al. (2013)	52.4	0.28	5.57	1.04	2.6	0.07	15.1	21.1	1.47	0		99.63	91.1914
XLHT19	Cpx	Abaga	Pan et al. (2013)	52.3	0.46	5.58	1.03	2.8	0.06	15.8	20.3	1.39	0.01		99.73	90.9573
XLHT20	Cpx	Abaga	Pan et al. (2013)	52.4	0.52	6.33	0.85	2.61	0.1	14.1	20.6	1.8	0.01		99.32	90.5926
XLHT22	Cpx	Abaga	Pan et al. (2013)	52.9	0.22	4.47	0.86	2.33	0.08	15.4	22.1	1.18	0		99.54	92.1763
southeastern NEC
BLS-1	Cpx	Shuangliao	Yu et al. (2009)	51.89	0.42	5.89	0.61	2.74	0.08	15.21	20.75	1.43		0.08	99.1	90.8216
BLS-2	Cpx	Shuangliao	Yu et al. (2009)	53.27	0.1	3.58	1.59	2.27	0.08	16.03	20.01	1.76		0.05	98.74	92.6405
BLS-3	Cpx	Shuangliao	Yu et al. (2009)	51.49	0.52	6.22	0.75	2.81	0.08	15.35	20.42	1.56		0.04	99.24	90.6868
BLS-5	Cpx	Shuangliao	Yu et al. (2009)	51.44	0.47	6.48	0.62	3.34	0.08	15.54	19.26	1.54		0.08	98.85	89.24
BLS-6	Cpx	Shuangliao	Yu et al. (2009)	52.98	0.08	3	0.97	2.29	0.06	16.91	22.02	0.76		0.04	99.11	92.9393
NBS-1	Cpx	Shuangliao	Yu et al. (2009)	51.34	0.62	5.57	0.68	2.63	0.09	15.28	21.78	1.26		0.06	99.31	91.1944
BBT-1	Cpx	Shuangliao	Yu et al. (2009)	52.22	0.12	4.83	0.92	3.09	0.09	16.86	20.28	0.8		0.05	99.26	90.677
BBT-2	Cpx	Shuangliao	Yu et al. (2009)	52.76	0.08	3.35	1.27	2.11	0.06	16.03	21.16	1.21		0.03	98.06	93.1235
BBT-4	Cpx	Shuangliao	Yu et al. (2009)	53.17	0.09	3.31	1.31	2.14	0.07	15.93	21.84	1.2		0.05	99.11	92.9919
BBT-5	Cpx	Shuangliao	Yu et al. (2009)	52.92	0.07	3.25	1.23	2.09	0.09	15.82	21.79	1.17		0.03	98.46	93.1
BBT-6	Cpx	Shuangliao	Yu et al. (2009)	52.22	0.1	4.16	1.16	2.83	0.08	16.75	19.77	1.14		0.1	98.31	91.3423
BBT-7	Cpx	Shuangliao	Yu et al. (2009)	52.23	0.13	4.07	0.92	2.78	0.08	16.9	20.91	0.7		0.05	98.77	91.5515
BBT-8	Cpx	Shuangliao	Yu et al. (2009)	51.12	0.55	6.81	0.75	3.53	0.09	15.87	18.68	1.37		0.07	98.84	88.906
BBT-9	Cpx	Shuangliao	Yu et al. (2009)	52.92	0.15	3	1.34	2.68	0.08	17.23	19.92	1.02		0.06	98.4	91.9745
BBT-10	Cpx	Shuangliao	Yu et al. (2009)	52.34	0.2	4.42	1.33	2.74	0.09	16.88	19.88	1.08		0.07	99.03	91.6538
BBT-11	Cpx	Shuangliao	Yu et al. (2009)	51.87	0.15	4.23	0.96	2.97	0.08	16.98	20.34	0.77		0.09	98.44	91.0644
BBT1-5	Cpx	Shuangliao	Hao et al. (2016)	52.31	0.16	5.28	1.35	2.79	0.09	17	19.04	1.6	0.01	0.01	99.64	91.5693
BBT1-06	Cpx	Shuangliao	Hao et al. (2016)	51.83	0.21	5.62	1.33	2.77	0.1	16.87	18.9	1.59	0.01	0.03	99.26	91.5656
BBT2-4	Cpx	Shuangliao	Hao et al. (2016)	51.41	0.23	4.79	1.22	2.66	0.08	17.32	19.9	1.17	0	0.02	98.8	92.0677
BBT2-14	Cpx	Shuangliao	Hao et al. (2016)	51.9	0.32	4.15	1.42	2.74	0.08	17.07	20.33	1.06	0.01	0.01	99.09	91.7391
BL2-10	Cpx	Shuangliao	Hao et al. (2016)	51.19	0.27	6.37	0.94	2.55	0.09	15.78	20.09	1.62	0	0.03	98.93	91.688
17SL1-1	Cpx	Shuangliao	Guo et al. (2020)	52.72	0.27	5.25	0.86	2.51	0.07	15.69	21.09	1.25	0.01	0.05	99.77	91.7646
17SL1-2	Cpx	Shuangliao	Guo et al. (2020)	52.05	0.48	6.36	0.79	2.79	0.09	15.42	19.61	1.63		0.05	99.27	90.7851
17SL1-7	Cpx	Shuangliao	Guo et al. (2020)	52.74	0.46	4.4	1.35	2.27	0.09	15.88	20.45	1.5	0	0.01	99.15	92.5761
17SL1-8	Cpx	Shuangliao	Guo et al. (2020)	54.29	0.09	2.46	0.89	2.32	0.08	17.61	22.11	0.41	0	0.02	100.28	93.1179
17SL1-16	Cpx	Shuangliao	Guo et al. (2020)	52.55	0.39	6.2	0.67	2.41	0.08	14.3	21.04	1.71	0.01	0.03	99.39	91.3622
17SL1-18	Cpx	Shuangliao	Guo et al. (2020)	52.9	0.4	5.61	0.86	2.4	0.09	14.73	20.86	1.63	0.01	0.03	99.52	91.6251
17SL1-20	Cpx	Shuangliao	Guo et al. (2020)	53.15	0.31	3.08	0.99	2.25	0.1	16.58	22.12	0.63	0.05	0.08	99.34	92.9256
17SL1-23	Cpx	Shuangliao	Guo et al. (2020)	53.12	0.12	3.99	0.79	2.25	0.09	16.37	21.95	0.68	0.01	0.07	99.44	92.8413
17SL2-3	Cpx	Shuangliao	Guo et al. (2020)	52.85	0.28	5.48	0.82	2.3	0.08	15.1	21.33	1.42	0.01	0.03	99.7	92.1277
17SL2-6	Cpx	Shuangliao	Guo et al. (2020)	52.46	0.65	6.66	0.7	2.42	0.08	14.14	20.74	1.77	0	0.08	99.7	91.2399
17SL2-7	Cpx	Shuangliao	Guo et al. (2020)	52.26	0.81	6.32	0.69	2.44	0.09	14.28	20.76	1.79	0.01	0.07	99.52	91.2529
17SL3-15	Cpx	Shuangliao	Guo et al. (2020)	51.3	0.32	5.68	1.37	2.5	0.08	16.43	20.55	1.51	0		99.74	92.1352
17SL3-16	Cpx	Shuangliao	Guo et al. (2020)	53.38	0.3	3.44	1.51	2.52	0.07	17.19	19.84	1.14	0	0.08	99.47	92.401
l-14	Cpx	Yitong	Xu et al. (1993)	52.32	0.41	6.06	0.57	2.7	0.13	15.46	19.62	1.72		0.1	99.09	91.0768
l-44	Cpx	Yitong	Xu et al. (1993)	52.11	0.38	5.7	0.63	2.61	0.1	15.77	19.56	1.94		0.05	98.85	91.5041
2-07	Cpx	Yitong	Xu et al. (1993)	52.62	0.29	5.05	0.46	2.76	0.1	15.19	20.28	1.58		0.03	98.36	90.7497
2-32	Cpx	Yitong	Xu et al. (1993)	52.41	0.3	4.97	0.73	2.51	0.15	16.16	20.76	1.17		0.05	99.21	91.9849
3-07	Cpx	Yitong	Xu et al. (1993)	54.16	0.11	2.02	0.68	2.45	0.08	17.55	22.35	0.73		0.07	100.2	92.7373
3-17	Cpx	Yitong	Xu et al. (1993)	51	0.48	7.42	0.87	3.42	0.15	14.59	18.86	2.61		0.04	99.44	88.3782
l-48	Cpx	Yitong	Xu et al. (1993)	53.19	0.3	3.73	0.64	4.52	0.1	14.88	20.94	1.28		0.05	99.63	85.4402
l-17	Cpx	Yitong	Xu et al. (1993)	49.92	0.79	7.95	0.54	5.34	0.13	13.57	18.72	2.15		0.01	99.12	81.9162
2-12	Cpx	Yitong	Xu et al. (1993)	52.12	0.43	5.29	0.66	2.52	0.11	15.09	21.65	1.77		0.08	99.72	91.434
2-31	Cpx	Yitong	Xu et al. (1993)	52.89	0.23	4.31	0.76	2.28	0.08	15.34	22.5	1.09		0.04	99.52	92.3036
2-51	Cpx	Yitong	Xu et al. (1993)	52.11	0.32	4.62	0.67	2.45	0.09	15.33	22.26	1.09		0.07	99.01	91.772
DX91-7	Cpx	Yitong	Xu et al. (1993)	52.46	0.42	5.29	0.64	2.57	0.03	14.86	21.91	1.44		0.01	99.63	91.1558
DX-06	Cpx	Yitong	Zhou et al. (2010)	54.19	0.2	4.97	0.7	2.63	0.12	16.25	20.27	1.24	0.01	0.03	100.61	91.6763
DX-07	Cpx	Yitong	Zhou et al. (2010)	54.25	0.19	4.94	0.9	2.48	0.08	16.32	20.7	1.13	0.01	0.06	101.06	92.1448
DX-08	Cpx	Yitong	Zhou et al. (2010)	54.07	0.29	5.8	0.68	2.86	0.06	15.76	19.25	1.74	0.02	0.05	100.58	90.7602
DX-10	Cpx	Yitong	Zhou et al. (2010)	53.96	0.41	4.8	0.75	2.45	0.09	15.72	20.87	1.32	0.02	0.04	100.43	91.9598
DX-11	Cpx	Yitong	Zhou et al. (2010)	54.96	0.23	4.74	0.74	2.42	0.08	16.05	20.8	1.52	0	0.04	101.58	92.2011
08DX-01	Cpx	Yitong	Zhou et al. (2010)	51.86	0.43	4.39	0.44	2.71	0.12	15.6	21.32	0.82	0	0.08	97.77	91.1199
08DX-02	Cpx	Yitong	Zhou et al. (2010)	52.48	0.26	4.85	0.72	2.74	0.09	15.75	20.37	1.1	0	0.06	98.42	91.1083
08DX-04	Cpx	Yitong	Zhou et al. (2010)	52.6	0.3	5.53	0.5	2.93	0.09	15.79	20.4	1.13	0.01	0.07	99.35	90.5717
08DX-06	Cpx	Yitong	Zhou et al. (2010)	52.85	0.27	4.54	0.58	2.67	0.08	15.62	21.08	1.02	0	0.05	98.76	91.2498
08DX-08	Cpx	Yitong	Zhou et al. (2010)	52.92	0.28	5.21	0.63	2.93	0.06	15.97	20.48	1.08	0.01	0.03	99.6	90.668
08DX-10	Cpx	Yitong	Zhou et al. (2010)	52.34	0.61	6.02	0.47	3.17	0.09	14.6	19.63	1.74	0.02	0.03	98.72	89.1421
08DX-11	Cpx	Yitong	Zhou et al. (2010)	51.7	0.26	5.18	0.71	2.98	0.11	15.62	20.5	1.1	0.01	0.05	98.22	90.332
08DX-12	Cpx	Yitong	Zhou et al. (2010)	50.73	0.89	5.97	0.75	2.81	0.06	14.91	20.7	1.33	0.01	0.05	98.21	90.4382
08DX-13	Cpx	Yitong	Zhou et al. (2010)	51.77	0.48	5.28	0.57	2.97	0.09	14.93	21.04	1.31	0.01	0.04	98.49	89.9606
08DX-14	Cpx	Yitong	Zhou et al. (2010)	51.4	0.66	5.93	0.62	3.36	0.12	14.94	20.04	1.53	0.01	0.06	98.67	88.7968
08DX-15	Cpx	Yitong	Zhou et al. (2010)	52.48	0.24	5	0.93	2.94	0.1	15.68	20.12	1.41	0.01	0.07	98.98	90.4825
DX-03	Cpx	Yitong	Zhou et al. (2010)	53.23	0.34	5.87	0.8	2.76	0.1	15.66	20.78	1.48	0.01	0.05	101.08	91.0024
DX-09	Cpx	Yitong	Zhou et al. (2010)	54.29	0.39	5.08	0.6	2.52	0.12	15.91	21.15	1.22	0	0.04	101.32	91.8395
08DX-05	Cpx	Yitong	Zhou et al. (2010)	52.39	0.28	5.29	0.57	2.86	0.09	15.99	20.25	1.16	0.01	0.05	98.94	90.881
08DX-07	Cpx	Yitong	Zhou et al. (2010)	52.49	0.36	5.28	0.42	2.78	0.08	15.13	20.63	1.31	0	0.04	98.52	90.6555
08DX-17	Cpx	Yitong	Zhou et al. (2010)	53.38	0.13	4.29	0.82	2.68	0.08	16.32	20.82	1.02	0.01	0.06	99.61	91.5647
08DX-18	Cpx	Yitong	Zhou et al. (2010)	52.53	0.24	4.93	0.9	2.88	0.12	15.88	20.54	1.18	0	0.06	99.26	90.7654
DX-04	Cpx	Yitong	Zhou et al. (2010)	53.22	0.31	3.47	0.34	2.58	0.1	15.51	22.49	0.93	0	0.03	98.98	91.4647
DX-05	Cpx	Yitong	Zhou et al. (2010)	54.2	0.31	4	0.45	2.69	0.07	15.42	22.3	1.13	0.01	0.03	100.61	91.0859
08DX-03	Cpx	Yitong	Zhou et al. (2010)	51.65	0.53	5.86	0.73	3.95	0.12	14.93	20.01	1.39	0	0.05	99.22	87.0761
08DX-09	Cpx	Yitong	Zhou et al. (2010)	52.83	0.05	2.83	0.72	2.74	0.09	16.89	21.69	0.52	0.01	0.05	98.42	91.6584
DX-01	Cpx	Yitong	Zhou et al. (2010)	53.45	0.21	2.62	0.51	2.43	0.07	17.01	21.67	0.5	0.03	0.04	98.54	92.5804
DX-02	Cpx	Yitong	Zhou et al. (2010)	54.47	0.1	1.69	0.38	2.05	0.1	16.42	23.53	0.55	0	0.04	99.33	93.4546
08DX-20	Cpx	Yitong	Zhou et al. (2010)	55.02	0.15	0.54	1.85	2.74	0.1	17.93	19.95	1.16	0.02	0.03	99.49	92.104
08DX-16	Cpx	Yitong	Zhou et al. (2010)	48.87	1.65	6.58	1.28	2.85	0.1	14.32	23.1	0.61	0.02	0.01	99.39	89.9564
08DX-19	Cpx	Yitong	Zhou et al. (2010)	51.1	0.64	4.38	1.52	2.99	0.07	15.08	22.02	0.9	0.05	0.06	98.81	89.9903
YT-5	Cpx	Yitong	Hao et al. (2016)	51.98	0.21	5.33	1.03	2.58	0.07	16.71	20.38	1.22	0.01	0.04	99.56	92.0288
YT-25	Cpx	Yitong	Hao et al. (2016)	52.03	0.58	3.92	0.93	2.28	0.07	16.38	21.79	1.09	0	0.04	99.11	92.7569
YT-26	Cpx	Yitong	Hao et al. (2016)	53.33	0.09	2.81	0.87	2.23	0.09	17.48	21.81	0.98	0.01	0.02	99.72	93.3212
DSH00-2	Cpx	Jiaohe	Zhou et al. (2007)	52.96	0.52	6.53	0.75	2.64	0.12	14.72	20.55	1.74	0.01	0.05	100.59	90.8585
DSH00-3	Cpx	Jiaohe	Zhou et al. (2007)	53.19	0.47	6.35	0.67	2.69	0.07	14.92	20.51	1.64	0	0.08	100.59	90.8146
DSH00-4	Cpx	Jiaohe	Zhou et al. (2007)	53.07	0.21	4.48	0.75	2.51	0.1	16.06	22.4	0.85	0.01	0.06	100.5	91.9391
DSH00-5	Cpx	Jiaohe	Zhou et al. (2007)	52.83	0.37	5.33	0.81	2.26	0.05	14.94	21.68	1.52	0.03	0.03	99.85	92.1776
DSH00-6	Cpx	Jiaohe	Zhou et al. (2007)	52.91	0.57	6.96	0.82	2.51	0.13	14.64	20.39	2.03	0.02	0.06	101.04	91.2258
DSH00-7	Cpx	Jiaohe	Zhou et al. (2007)	53.15	0.67	6.98	0.87	2.78	0.06	14.79	20.18	2.04	0	0.05	101.57	90.4611
DSH00-8	Cpx	Jiaohe	Zhou et al. (2007)	52.08	0.33	5.58	0.95	2.52	0.09	15.55	21.44	1.38	0	0.05	99.97	91.6663
DSH00-10	Cpx	Jiaohe	Zhou et al. (2007)	53.17	0.31	4.77	1.14	2.15	0.06	15.86	21.69	1.48	0.02	0.02	100.67	92.9326
DSH00-11	Cpx	Jiaohe	Zhou et al. (2007)	52.79	0.18	4.19	0.86	2.44	0.08	16.25	22.3	0.71	0.04	0.07	99.91	92.2309
DSH00-12	Cpx	Jiaohe	Zhou et al. (2007)	53.01	0.48	6.04	0.73	2.52	0.1	15.43	20.81	1.49	0.04	0.05	100.7	91.6069
YQS-1	Cpx	Jiaohe	Yu et al. (2009)	52.13	0.14	3.8	0.73	2.34	0.07	16.04	23.3	0.58		0.08	99.21	92.4351
YQS-2	Cpx	Jiaohe	Yu et al. (2009)	54.03	0.05	2.37	1.4	1.88	0.08	16.18	22.1	1.22		0.08	99.39	93.8805
YQS-3	Cpx	Jiaohe	Yu et al. (2009)	52.36	0.1	3.6	0.74	2.15	0.08	16.12	22.89	0.7		0.04	98.78	93.0386
YQS-4	Cpx	Jiaohe	Yu et al. (2009)	52.89	0.17	3.6	1.17	1.89	0.08	15.8	22.41	1.14		0.04	99.19	93.7114
YQS-5	Cpx	Jiaohe	Yu et al. (2009)	52.38	0.16	3.53	0.82	2.21	0.06	16.03	23.27	0.65		0.03	99.14	92.821
YQS-6	Cpx	Jiaohe	Yu et al. (2009)	52.66	0.11	4.14	1.08	2.02	0.07	15.66	22.38	1.19		0.04	99.35	93.252
YQS-7	Cpx	Jiaohe	Yu et al. (2009)	52.08	0.5	6.2	0.93	2.27	0.07	14.42	21.01	1.83		0.07	99.38	91.8854
YQS-8	Cpx	Jiaohe	Yu et al. (2009)	53.19	0.09	3.62	1.24	2.29	0.08	16.02	21.68	1.2		0.08	99.49	92.5761
YQS-9	Cpx	Jiaohe	Yu et al. (2009)	51.96	0.55	6.49	0.8	2.62	0.07	14.6	20.56	1.81		0.04	99.5	90.8536
YQS-10	Cpx	Jiaohe	Yu et al. (2009)	53.23	0.15	2.98	0.94	2.06	0.08	16.44	22.58	0.78		0.15	99.39	93.4322
YQS-11	Cpx	Jiaohe	Yu et al. (2009)	53.16	0.14	3.88	1.08	2	0.07	15.84	21.74	1.3		0.12	99.33	93.3853
YQS-12	Cpx	Jiaohe	Yu et al. (2009)	52.83	0.15	3.92	1.06	2.57	0.1	16.63	21.18	0.87		0.03	99.34	92.0221
YQS-14	Cpx	Jiaohe	Yu et al. (2009)	53.13	0.05	2.91	1.14	1.93	0.06	16.47	22.57	0.77		0.04	99.07	93.8316
YQS-15	Cpx	Jiaohe	Yu et al. (2009)	54.31	0.23	3.59	1.27	2.38	0.06	15.38	19.93	2.21		0.07	99.43	92.0123
YQS-16	Cpx	Jiaohe	Yu et al. (2009)	52.98	0.19	4.34	1.33	2.08	0.08	15.73	21	1.45		0.08	99.26	93.0942
DSH009	Cpx	Jiaohe	Hao et al. (2016)	51.18	0.65	7.14	0.75	2.56	0.07	14.29	20.45	1.88	0.01	0.06	99.04	90.8678
DSH0012	Cpx	Jiaohe	Hao et al. (2016)	52.61	0.48	6.14	0.84	2.4	0.07	15.07	20.9	1.36	0	0.07	99.94	91.7985
DSH0014	Cpx	Jiaohe	Hao et al. (2016)	52.46	0.42	5.91	0.87	2.32	0.07	14.99	20.94	1.34	0.01	0.06	99.39	92.0111
DSH0017	Cpx	Jiaohe	Hao et al. (2016)	52.14	0.21	4.68	1.03	2.33	0.09	15.82	21.71	1.2	0	0.03	99.24	92.3682
17JH4	Cpx	Jiaohe	Guo et al. (2020)	52.28	0.59	6.76	0.73	2.72	0.07	14.78	19.74	1.87	0.01	0.03	99.58	90.642
17JH5	Cpx	Jiaohe	Guo et al. (2020)	53.37	0.2	3.71	1.32	2	0.08	16.12	21.52	1.15	0.01	0.06	99.54	93.4927
17JH14	Cpx	Jiaohe	Guo et al. (2020)	53.46	0.24	2.66	1.58	1.71	0.04	15.66	21.66	1.81	0.14	0.04	99	94.2278
17JH18	Cpx	Jiaohe	Guo et al. (2020)	52.78	0.33	5.79	1.06	2.08	0.05	14.89	21.09	1.7	0.01	0.03	99.81	92.7329
17JH21	Cpx	Jiaohe	Guo et al. (2020)	52.64	0.33	5.44	1.18	2.32	0.09	15.22	20.72	1.43	0.01	0.06	99.44	92.1224
17JH24	Cpx	Jiaohe	Guo et al. (2020)	52.88	0.28	5.08	1.33	2.26	0.06	15.55	20.24	1.66	0.05	0.06	99.45	92.4613
WQ91-1	Cpx	Wangqing	Xu et al. (1998)	51.85	0.71	7.51	1.07	2.49	0.01	14.28	21.19	1.64		0.04	100.79	91.0896
WQ91-37	Cpx	Wangqing	Xu et al. (1998)	52.46	0.63	7.08	0.81	2.66	0.14	14.33	20.92	1.8		0	100.83	90.5687
WQ91-6	Cpx	Wangqing	Xu et al. (1998)	52.07	0.58	7	0.69	2.58	0.05	14.2	19.62	2.15		0.08	99.02	90.7501
WQ91-11	Cpx	Wangqing	Xu et al. (1998)	52.21	0.16	5.37	1.12	2.12	0.08	15.13	22.26	1.33		0.08	99.86	92.7123
WQ91-77	Cpx	Wangqing	Xu et al. (1998)	52.48	0.42	5.64	1.48	2.09	0.05	14.89	20.3	1.8		0.01	99.16	92.7005
WQ91-5	Cpx	Wangqing	Xu et al. (1998)	53.71	0.05	2.82	1.19	2.31	0.08	16.97	20.67	1.14		0.1	99.04	92.9054
WQ91-13	Cpx	Wangqing	Xu et al. (1998)	54.75	0.08	2.85	1.39	2.04	0.06	16.13	22.19	1.34		0.03	100.86	93.375
WQ91-20	Cpx	Wangqing	Xu et al. (1998)	52.29	0.37	5.08	1.07	2.37	0.06	15.19	21.59	1.27		0.03	99.32	91.9516
WQ91-21	Cpx	Wangqing	Xu et al. (1998)	53.53	0.17	3.83	0.85	2.08	0.09	15.79	22.42	0.94		0.03	99.73	93.1186
WQ91-22	Cpx	Wangqing	Xu et al. (1998)	53.28	0.48	4.97	1.87	2.31	0.09	15.35	20.04	1.92		0.04	100.35	92.2149
WQ5	Cpx	Wangqing	Song et al. (2013)	51.87	0.24	3.69	0.71	2.67	0.08	16.82	22.83	0.81	0.16		99.88	91.823
WQ9	Cpx	Wangqing	Song et al. (2013)	51.56	0.96	3.77	1.02	3.16	0.08	16.58	22.21	0.6	0.01		99.95	90.3407
WQ10	Cpx	Wangqing	Song et al. (2013)	52.5	0.48	5.58	0.78	2.69	0.07	14.56	20.94	1.88	0.01		99.49	90.6088
WQ13	Cpx	Wangqing	Song et al. (2013)	52.41	0.38	5.82	0.92	2.36	0.07	15.22	20.78	2.01	<0.01		99.97	91.9974
WQ15	Cpx	Wangqing	Song et al. (2013)	50.58	0.35	6.7	0.93	2.54	0.08	15.26	21.67	1.78	<0.01		99.89	91.4598
WQ16	Cpx	Wangqing	Song et al. (2013)	51.29	0.46	5.93	0.78	2.32	0.06	15.48	21.37	1.39	<0.01		99.08	92.2444
PFS5	Cpx	Wangqing	Wang et al. (2013)	51.44	0.43	3.82	1.11	2.55	0.09	16.59	22.65	0.56		0.06	99.3	92.0617
PFS10	Cpx	Wangqing	Wang et al. (2013)	52.16	0.52	6.12	1.01	2.51	0.06	14.6	20.94	1.88		0.09	99.89	91.2039
PFS13	Cpx	Wangqing	Wang et al. (2013)	52.88	0.4	6.1	1.01	2.27	0.03	14.4	20.51	2.07		0.07	99.74	91.8751
PFS15	Cpx	Wangqing	Wang et al. (2013)	52.48	0.34	5.41	0.8	2.2	0.07	15.49	20.94	1.63		0.08	99.44	92.6204
PFS16	Cpx	Wangqing	Wang et al. (2013)	51.29	0.46	5.93	0.78	2.32	0.06	15.48	21.37	1.39		0.09	99.17	92.2444
WQ39	Cpx	Wangqing	Hao et al. (2016)	53.61	0.18	3.59	1.42	2.05	0.08	15.37	21.87	1.21	0	0.01	99.39	93.0385
WQ62	Cpx	Wangqing	Hao et al. (2016)	52.6	0.22	4.44	0.55	2.25	0.06	15.79	22.78	0.56	0	0.05	99.3	92.5978
WQ72	Cpx	Wangqing	Hao et al. (2016)	51.87	0.42	7.16	0.89	2.37	0.06	14.09	20.2	1.84	0	0.02	98.92	91.3775
WQ-004	Cpx	Wangqing	Hao et al. (2016)	51.74	0.34	5.7	0.58	2.41	0.07	15.43	21.99	1.15	0	0	99.41	91.9438
WQ-005	Cpx	Wangqing	Hao et al. (2016)	51.33	0.33	6.15	0.85	2.48	0.09	15.53	21.29	1.36	0	0.02	99.43	91.778
WQ-006	Cpx	Wangqing	Hao et al. (2016)	51.64	0.41	6.1	0.72	2.35	0.07	15.61	22.07	1.15	0.01	0.02	100.15	92.2123
WQ-101	Cpx	Wangqing	Hao et al. (2016)	51.9	0.32	5.48	0.72	2.17	0.08	15.83	21.55	1.36	0	0	99.41	92.859
northeastern NCC
CBH1	Cpx	Changbaishan	Liu (2014)	51.61	0.5	6.21	0.75	2.76	0.03	15.5	20.39	1.54		0.09	99.38	90.9179
CBH2	Cpx	Changbaishan	Liu (2014)	51.6	0.61	6.84	0.68	2.74	0.1	15.05	20.21	2	0.01	0.07	99.91	90.733
CBH3	Cpx	Changbaishan	Liu (2014)	52.01	0.4	6.08	0.84	2.64	0.06	15.62	19.82	1.9	0.01	0.09	99.47	91.3396
CBH4	Cpx	Changbaishan	Liu (2014)	51.72	0.64	6.93	0.61	3.21	0.08	14.89	19.2	1.86		0.08	99.22	89.2109
CBH5	Cpx	Changbaishan	Liu (2014)	52.65	0.3	4.85	1.22	2.47	0.06	15.67	20.95	1.47	0.01	0.1	99.75	91.8757
CBH6	Cpx	Changbaishan	Liu (2014)	52.21	0.17	4.9	0.82	3.06	0.06	16.79	20.32	1.1	0.01	0.12	99.56	90.7242
CBH7	Cpx	Changbaishan	Liu (2014)	52.11	0.32	5.19	0.78	2.77	0.04	16.1	20.8	1.14		0.07	99.32	91.1977
CBH8	Cpx	Changbaishan	Liu (2014)	51.58	0.55	6.33	0.84	2.45	0.04	15.05	20.72	1.73		0.08	99.37	91.6318
BDX-01	Cpx	Changbaishan	Par et al. (2017)	52.1142	0.378	6.089	0.8205	2.68425	0.07525	15.2288	20.2805	1.673	0.028	0.04725	99.4357	91.0016
BDX-02	Cpx	Changbaishan	Par et al. (2017)	51.8716	0.5836	7.1168	0.7716	2.8092	0.0732	14.1762	20.7502	1.9122	0.0165	0.0492	100.139	89.9954
BDX-03	Cpx	Changbaishan	Par et al. (2017)	51.7803	0.579	6.821	0.705667	2.68567	0.076	14.0757	21.3503	1.88867	0.005	0.0553333	100.046	90.3311
BDX-04	Cpx	Changbaishan	Par et al. (2017)	51.9072	0.542	6.795	0.7482	2.9122	0.1074	14.7164	20.3134	1.871	0.00866667	0.0586667	100.035	90.0079
BDX-05	Cpx	Changbaishan	Par et al. (2017)	52.3435	0.2875	4.257	0.977	2.5295	0.057	16.032	22.8515	0.818	0	0.0485	100.224	91.8685
BDX-06	Cpx	Changbaishan	Par et al. (2017)	51.8835	0.34925	6.43725	1.01875	2.30375	0.08	14.406	20.482	2.025	0.002	0.0415	99.029	91.7674
BDX-07	Cpx	Changbaishan	Par et al. (2017)	51.797	0.447	6.30233	0.841	2.392	0.0973333	14.374	21.3813	1.64867	0.014	0.037	99.3797	91.4615
BDX-08	Cpx	Changbaishan	Par et al. (2017)	51.7877	0.312	4.79275	0.85225	2.767	0.094	15.3163	22.2878	0.911	0.0095	0.038	99.2422	90.7978
BDX-09	Cpx	Changbaishan	Par et al. (2017)	51.863	0.394667	5.67367	0.93	2.45367	0.082	14.5067	21.5683	1.52433	0.015	0.0405	99.0628	91.3336
BDX-13	Cpx	Changbaishan	Par et al. (2017)	51.9543	0.331	6.4325	0.97275	2.29375	0.0895	14.3355	20.826	1.94575	0.019	0.0273333	99.2843	91.7632
BDX-14-1	Cpx	Changbaishan	Par et al. (2017)	52.4175	0.21675	5.10475	0.827	2.6855	0.08725	15.7763	21.0865	1.267	0.012	0.04375	99.5602	91.283
BDX-14-2	Cpx	Changbaishan	Par et al. (2017)	53.7823	0.03325	1.97	0.74875	2.3745	0.07575	17.9902	22.489	0.23075	0.019	0.05725	99.8144	93.106
BDX-15-1	Cpx	Changbaishan	Par et al. (2017)	53.3418	0.0505	2.975	1.20775	2.39625	0.07675	16.8263	21.4355	0.856	0.021	0.07375	99.295	92.6019
BDX-15-2	Cpx	Changbaishan	Par et al. (2017)	52.2392	0.48325	6.46275	1.24075	2.42725	0.08025	14.1937	20.305	2.1145	0.0095	0.045	99.6279	91.2463
BDX-16-1	Cpx	Changbaishan	Par et al. (2017)	51.7112	0.51825	6.45075	0.69775	3.0565	0.087	14.9477	20.246	1.6595	0.0243333	0.031	99.4301	89.7093
BDX-16-2	Cpx	Changbaishan	Par et al. (2017)	51.3587	0.537	6.74	0.765667	2.69333	0.0753333	14.0873	21.32	1.74467	0.0155	0.0483333	99.4078	90.3134
CBS01	Cpx	Changbaishan	Xu et al. (2019)	52.311	0.488	6.301	0.954	2.552	0.099	15.081	20.729	1.536	0.019	0.025	100.095	91.33
CBS02	Cpx	Changbaishan	Xu et al. (2019)	52.957	0.444	4.976	0.929	2.437	0.074	16.542	21.308	1.08	0.009	0.088	100.844	92.3662
CBS03	Cpx	Changbaishan	Xu et al. (2019)	51.193	0.54	7.539	1.101	2.702	0.078	15.244	19.996	1.778	0.013	0.01	100.194	90.9557
CBS04	Cpx	Changbaishan	Xu et al. (2019)	52.07	0.413	5.962	1.023	2.518	0.089	15.349	21.405	1.271	0.009	0.049	100.158	91.5725
CBS05	Cpx	Changbaishan	Xu et al. (2019)	52.897	0.351	5.508	0.927	2.478	0.099	15.893	21.444	1.207	0	0.031	100.835	91.9567
CBS06	Cpx	Changbaishan	Xu et al. (2019)	52.346	0.387	5.173	0.856	2.258	0.07	15.963	21.965	1.013	0	0.018	100.049	92.648
CBS07	Cpx	Changbaishan	Xu et al. (2019)	52.332	0.429	5.231	0.767	2.443	0.072	15.786	22.031	0.977	0.013	0.041	100.122	92.0117
CBS08	Cpx	Changbaishan	Xu et al. (2019)	52.932	0.387	5.691	0.73	2.822	0.072	16.652	20.226	1.21	0.01	0.037	100.769	91.3183
CBS09	Cpx	Changbaishan	Xu et al. (2019)	53.237	0.393	7.283	0.75	2.641	0.084	15.466	19.048	1.611	0	0.024	100.537	91.2578
CBS10	Cpx	Changbaishan	Xu et al. (2019)	52.601	0.397	5.698	0.815	2.558	0.083	16.501	20.551	1.306	0.01	0.033	100.553	91.9992
CBS11	Cpx	Changbaishan	Xu et al. (2019)	52.0606	0.436	6.1502	0.6906	2.5698	0.0984	14.9566	21.4562	1.3494	0.0104	0.042	99.8202	91.2086
CBS12	Cpx	Changbaishan	Xu et al. (2019)	52.0108	0.484167	6.01633	1.032	2.35667	0.0803333	14.9795	20.5737	1.6235	0.0281667	0.0441667	99.2293	91.8899
TC01	Cpx	Changbaishan	Xu et al. (2020)	52.47	0.35	5.88	1.01	2.53	0.08	15.06	20.9	1.24	0	0.01	99.53	91.3873
TC02	Cpx	Changbaishan	Xu et al. (2020)	52.95	0.39	5.76	0.77	2.48	0.09	15.08	20.82	1.32	0	0	99.66	91.5534
TC03	Cpx	Changbaishan	Xu et al. (2020)	53.21	0.42	5.86	1.02	2.44	0.08	15.08	20.38	1.54	0	0.01	100.04	91.6783
TC04	Cpx	Changbaishan	Xu et al. (2020)	53.99	0.14	4	1.12	2.58	0.08	16.69	20.54	0.95	0	0.01	100.1	92.02
TC05	Cpx	Changbaishan	Xu et al. (2020)	52.73	0.34	5.35	0.65	2.77	0.08	15.85	21.29	0.74	0	0	99.8	91.0713
TC06	Cpx	Changbaishan	Xu et al. (2020)	53	0.32	5.27	0.7	2.76	0.07	16.01	20.97	0.91	0	0.01	100.02	91.1817
TC07	Cpx	Changbaishan	Xu et al. (2020)	53	0.37	5.99	0.65	2.72	0.08	15.43	20.14	1.25	0	0.01	99.64	91.0008
TC08	Cpx	Changbaishan	Xu et al. (2020)	53.23	0.43	5.93	1.01	2.39	0.08	15.09	20.26	1.57	0	0.01	100	91.8399
SJXO-1	Cpx	Huinan	Xu et al. (2003)	51.07	0.47	5.55	0.62	3.11	0.05	15.62	22.2	1.16	0		99.85	89.9527
SJXO-2	Cpx	Huinan	Xu et al. (2003)	50.28	0.64	5.94	0.95	3.16	0.01	17.72	20.43	0.9	0.01		100.04	90.9056
SJXO-3	Cpx	Huinan	Xu et al. (2003)	51.38	0.4	4.13	0.74	2.27	0	15.65	22.78	1.02	0.01		98.38	92.4752
SJXO-4	Cpx	Huinan	Xu et al. (2003)	51.22	0.35	5.83	0.66	2.66	0	15.07	22.66	1.54	0.01		100	90.9901
SJXO-6	Cpx	Huinan	Xu et al. (2003)	50.96	0.14	4.83	0.65	4.28	0.11	17.49	20.17	1.06	0.01		99.7	87.929
SJXO-8	Cpx	Huinan	Xu et al. (2003)	52.05	0.01	4.44	0.7	3.15	0.02	17.86	20.66	0.86	0		99.75	90.9965
DLW-9	Cpx	Huinan	Xu et al. (2003)	50.75	0.42	5.41	0.61	2.8	0.03	15.96	22.03	1.26	0		99.27	91.0399
DYS-12	Cpx	Huinan	Xu et al. (2003)	50.43	0.42	5.73	0.5	2.7	0	16.36	22.18	1.19	0		99.51	91.5261
DYS-5	Cpx	Huinan	Xu et al. (2003)	51.19	0.51	6.2	0.46	2.64	0.05	15.18	22.52	1.72	0		100.47	91.1109
DYS-9	Cpx	Huinan	Xu et al. (2003)	51.24	0.47	4.8	0.61	3.26	0.04	16.62	22.18	1.04	0.02		100.28	90.087
DLW-3	Cpx	Huinan	Xu et al. (2003)	51.11	0.19	5.76	1.27	3.69	0.08	17.67	19.14	0.95	0		99.86	89.5134
DLW-4	Cpx	Huinan	Xu et al. (2003)	51.14	0.38	4.1	0.67	2.55	0.09	16.72	22.39	0.95	0		98.99	92.1185
DLW-5	Cpx	Huinan	Xu et al. (2003)	49.91	0.49	7.23	0.99	2.3	0.12	16.01	20.82	1.08	0.15		99.1	92.5418
DLW-6	Cpx	Huinan	Xu et al. (2003)	52.38	0.4	1.5	0.59	2.61	0	18.1	23.82	0.59	0		99.99	92.516
DLW-7	Cpx	Huinan	Xu et al. (2003)	51.09	0.24	4.38	0.89	2.22	0	16.51	22.87	0.98	0.01		99.19	92.9858
DLW-8	Cpx	Huinan	Xu et al. (2003)	51.64	0.14	3.75	1.35	2.76	0.06	16.4	20.85	1.62	0.02		98.59	91.3733
DYS-1	Cpx	Huinan	Xu et al. (2003)	51.28	0.51	4.58	1.19	2.61	0.02	16.36	21.28	1.16	0		98.99	91.7854
DYS-2	Cpx	Huinan	Xu et al. (2003)	51.63	0.31	4.59	1.38	2.47	0.08	16.04	21.05	1.56	0.01		99.12	92.0482
DYS-3	Cpx	Huinan	Xu et al. (2003)	50.98	0.34	3.67	1.14	2.44	0	17.54	22.07	1.04	0		99.22	92.7609
DYS-4	Cpx	Huinan	Xu et al. (2003)	51.41	0.3	5.27	0.74	2.9	0.08	15.75	21.89	1.2	0.01		99.55	90.6377
DYS-6	Cpx	Huinan	Xu et al. (2003)	50.58	0.18	3.76	1.42	2.34	0.08	15.83	21.66	1.29	0.02		97.16	92.3424
DYS-7	Cpx	Huinan	Xu et al. (2003)	51.45	0.49	4.94	1.42	2.63	0.07	17.63	20.12	1.43	0		100.18	92.2775
DYS-8	Cpx	Huinan	Xu et al. (2003)	52.45	0.17	4.08	1.1	2.78	0.12	17.58	20.09	1.35	0		99.72	91.8516
DYS-21	Cpx	Huinan	Xu et al. (2003)	51.76	0.27	5.07	1.4	2.98	0.07	17.08	20.75	1.24	0.02		100.64	91.0848
06JY02	Cpx	Huinan	Tang et al. (2012)	51.4	0.32	5.74	0.72	2.97	0.09	15.8	20.8	1.35	0.04	0.04	99.27	90.4607
06JY06	Cpx	Huinan	Tang et al. (2012)	51.9	0.38	4.86	0.87	3.16	0.08	16	21.8	0.98	0	0.05	100.08	90.0255
06JY30	Cpx	Huinan	Tang et al. (2012)	50.8	0.55	5.9	0.65	3.03	0.08	15.5	21.5	1.21	0.01	0.07	99.3	90.1173
06JY31	Cpx	Huinan	Tang et al. (2012)	52.4	0.3	4.51	1.09	2.75	0.09	15.9	21.6	1.1	0.01	0.07	99.82	91.1554
06JY34	Cpx	Huinan	Tang et al. (2012)	52.5	0.27	4.48	1.56	2.34	0.09	15.8	20.6	1.67	0.01	0.06	99.38	92.329
DLW1	Cpx	Huinan	Wang et al. (2013)	50.78	0.93	4.46	1.89	3.09	0.13	17.31	20.62	0.43		0.09	99.73	90.8973
DLW3	Cpx	Huinan	Wang et al. (2013)	51.54	0.53	6.46	0.64	2.74	0.05	14.97	20.79	1.59		0.08	99.39	90.6881
DLW5	Cpx	Huinan	Wang et al. (2013)	51.77	0.37	5.47	0.98	3.01	0.09	16.1	20.5	1.32		0.08	99.69	90.5075
DLW6	Cpx	Huinan	Wang et al. (2013)	52.63	0.43	4.41	1.6	2.35	0.11	15.83	20.8	1.42		0.08	99.66	92.3122
DLW8	Cpx	Huinan	Wang et al. (2013)	51.82	0.46	6.18	0.71	2.53	0.05	15.13	21.48	1.56		0.09	100.01	91.4237
DYS1	Cpx	Huinan	Wang et al. (2013)	52.13	0.4	4.42	1.34	2.54	0.03	16.23	20.87	1.36		0.06	99.38	91.929
DYS4	Cpx	Huinan	Wang et al. (2013)	51.68	0.41	5.66	0.7	2.84	0.08	15.89	21.55	1.22		0.07	100.1	90.8871
DYS5	Cpx	Huinan	Wang et al. (2013)	52.15	0.43	4.53	1.37	2.67	0.07	16.61	20.45	1.33		0.1	99.71	91.7282
DYS7	Cpx	Huinan	Wang et al. (2013)	52.53	0.39	4.37	1.2	2.52	0.07	16.1	20.94	1.44		0.09	99.65	91.928
DYS9	Cpx	Huinan	Wang et al. (2013)	51.29	0.56	6.1	0.71	2.71	0.1	15.23	21.2	1.63		0.06	99.59	90.9238
DYS12	Cpx	Huinan	Wang et al. (2013)	52.58	0.51	4.67	1.41	2.45	0.04	15.97	20.78	1.52		0.06	99.99	92.0757
DYS13	Cpx	Huinan	Wang et al. (2013)	51.95	0.43	4.9	1.17	2.75	0.07	16.63	19.93	1.51		0.09	99.43	91.5107
DYS14	Cpx	Huinan	Wang et al. (2013)	51.75	0.54	5.32	1.66	2.37	0.04	15.22	20.46	1.91		0.08	99.35	91.9662
LQL1	Cpx	Huinan	Wang et al. (2013)	51.92	0.22	4.1	0.92	3.05	0.06	17.58	20.59	0.93		0.07	99.44	91.1304
LQL3	Cpx	Huinan	Wang et al. (2013)	50.97	0.54	5.63	0.99	2.6	0.04	15.21	21.13	1.57		0.06	98.74	91.2495
LQL4	Cpx	Huinan	Wang et al. (2013)	52.29	0.31	4.84	0.8	2.87	0.08	16.53	20.63	1.1		0.08	99.53	91.1243
LQL6	Cpx	Huinan	Wang et al. (2013)	51.42	0.31	5.96	0.72	2.76	0.06	16.29	19.99	1.5		0.07	99.08	91.3201
LQL7	Cpx	Huinan	Wang et al. (2013)	51.39	0.53	4.71	0.92	3.12	0.06	16.3	20.94	1.23		0.08	99.28	90.3032
LQL8	Cpx	Huinan	Wang et al. (2013)	51.55	0.39	5.43	0.56	3.18	0.08	16.48	20.24	1.33		0.08	99.32	90.2324
HLW1	Cpx	Huinan	Liu (2014)	51.65	0.7	5.31	1.55	3.19	0.1	17.29	18.72	1.27		0.09	99.87	90.6205
HLW2	Cpx	Huinan	Liu (2014)	53.23	0.37	3.94	1.11	2.78	0.06	16.87	20.19	1.28	0.03	0.11	99.97	91.5377
HLW3	Cpx	Huinan	Liu (2014)	52.16	0.44	5.71	0.61	3.31	0.09	16.25	19.61	1.34		0.08	99.6	89.7449
HLW4	Cpx	Huinan	Liu (2014)	51.99	0.36	5.93	0.72	3.45	0.08	16.73	19.17	1.27	0.03	0.11	99.84	89.631
HLW5	Cpx	Huinan	Liu (2014)	52.26	0.39	5.02	0.62	2.49	0.1	15.59	21.74	1.28		0.06	99.55	91.7767
HYZ1	Cpx	Huinan	Liu (2014)	52.5	0.45	4.77	1.14	2.8	0.09	16.4	19.5	1.47		0.09	99.21	91.2592
HYZ2	Cpx	Huinan	Liu (2014)	51.81	0.38	5.51	0.6	3.1	0.06	16.12	21.06	1.24		0.1	99.98	90.2622
HYZ3	Cpx	Huinan	Liu (2014)	51.79	0.54	5.4	1.3	2.85	0.05	16.55	19.82	1.52		0.06	99.88	91.1904
HYZ4	Cpx	Huinan	Liu (2014)	52.41	0.38	4.72	1.2	2.82	0.09	16.95	19.53	1.46	0.01	0.1	99.67	91.4634
HYZ5	Cpx	Huinan	Liu (2014)	51.93	0.49	5.65	0.69	2.71	0.05	15.52	21.37	1.49	0.02	0.08	100	91.0783
HYZ6	Cpx	Huinan	Liu (2014)	52.18	0.47	4.46	1.32	2.64	0.06	16.1	20.43	1.55		0.07	99.28	91.576
HYZ7	Cpx	Huinan	Liu (2014)	51.94	0.47	5	1.16	2.86	0.07	16.95	19.55	1.43	0.01	0.09	99.53	91.3528
HYZ8	Cpx	Huinan	Liu (2014)	51.8	0.51	5.44	1.68	2.39	0.07	15.09	20.5	1.93	0.01	0.06	99.48	91.8399
HQL1	Cpx	Huinan	Liu (2014)	52.46	0.22	4.38	0.89	3.19	0.11	17.72	19.5	0.94	0.04	0.11	99.56	90.8272
HQL2	Cpx	Huinan	Liu (2014)	52.46	0.22	4.38	0.89	3.19	0.11	17.72	19.5	0.94	0.04	0.11	99.56	90.8272
HQL3	Cpx	Huinan	Liu (2014)	51.47	0.26	5.09	0.78	3.26	0.08	16.95	20.23	1.08	0.03	0.09	99.32	90.2612
HQL4	Cpx	Huinan	Liu (2014)	51.38	0.46	5.08	0.9	3.3	0.08	16.15	21.08	1.16		0.09	99.68	89.7159
HQL5	Cpx	Huinan	Liu (2014)	51.14	0.51	6.39	0.59	3.7	0.11	16.53	19.06	1.34	0.02	0.06	99.45	88.8439
HNd065	Cpx	Huinan	Lin et al. (2019)	52.147	1.169	4.209	1.081	2.465	0.084	17.104	20.802	0.361			99.432	92.5198
HNd066	Cpx	Huinan	Lin et al. (2019)	53.0331	0.191431	3.8443	0.909672	2.9036	0.0848349	16.4717	21.0814	1.2016			99.7049	91.0029
HNd067	Cpx	Huinan	Lin et al. (2019)
HNd068	Cpx	Huinan	Lin et al. (2019)
HNd069	Cpx	Huinan	Lin et al. (2019)
HNd071	Cpx	Huinan	Lin et al. (2019)	53.2343	0.246473	3.58655	1.78785	2.52701	0.0769539	16.1973	20.1571	1.92151			99.6033	91.9511
HNd074	Cpx	Huinan	Lin et al. (2019)	53.981	0.12	3.70433	1.29167	2.636	0.0816667	16.7543	19.663	1.15567			99.3917	91.8896
HNd075	Cpx	Huinan	Lin et al. (2019)	52.8382	0.644667	4.97017	1.18817	2.376	0.0751667	15.4492	20.641	1.34833			99.536	92.0575
HNd072	Cpx	Huinan	Lin et al. (2019)	53.4856	0.35	4.76	0.9058	2.595	0.0772	15.566	20.5322	1.266			99.5442	91.4476
HNd077	Cpx	Huinan	Lin et al. (2019)	53.3732	0.3094	4.4902	1.0696	2.5112	0.0862	15.859	20.498	1.2278			99.4312	91.8416
HNd085	Cpx	Huinan	Lin et al. (2019)	52.9606	0.616286	5.49329	1.16029	3.03314	0.0767143	16.0924	18.9206	1.25029			99.6091	90.4374
HNd087	Cpx	Huinan	Lin et al. (2019)	52.3303	0.626667	4.58483	0.790167	2.834	0.0758333	16.1533	21.052	0.844333			99.3077	91.0396
J001*	Cpx	Huinan	Lin et al. (2019)	52.04	0.47	6.03	0.82	3.01	0.07	15.06	20.58	1.2			99.29	89.918
J079*	Cpx	Huinan	Lin et al. (2019)	52.13	0.76	5.05	0.58	2.77	0.07	16.12	21	0.88			99.37	91.2077
J082*	Cpx	Huinan	Lin et al. (2019)	52.14	0.49	5.82	0.8	2.86	0.05	15.08	21.02	1.13			99.4	90.3836
J083*	Cpx	Huinan	Lin et al. (2019)	52.57	0.33	5.51	1.01	2.69	0.06	14.76	21.2	1.3			99.45	90.7243
J193*	Cpx	Huinan	Lin et al. (2019)	52.32	0.47	6.15	0.64	3.15	0.08	15.34	20.24	1.08			99.45	89.6702
J197*	Cpx	Huinan	Lin et al. (2019)	52.29	0.51	5.95	0.6	2.95	0.06	15.12	20.67	1.18			99.33	90.1345
J198*	Cpx	Huinan	Lin et al. (2019)	51.7	0.46	6.6	0.61	3.08	0.06	15.82	20.27	1.1			99.72	90.1534
J206*	Cpx	Huinan	Lin et al. (2019)	52.04	0.54	5.1	0.78	2.39	0.06	15.77	21.91	0.95			99.54	92.1642
J247*	Cpx	Huinan	Lin et al. (2019)	52.44	0.48	5.81	0.98	2.69	0.08	14.81	20.63	1.47			99.41	90.7527
J294*	Cpx	Huinan	Lin et al. (2019)	51.75	0.42	5.28	1.11	2.8	0.05	14.78	21.56	1.22	0.03		99	90.3932
J328*	Cpx	Huinan	Lin et al. (2019)	52.38	0.51	6.2	0.8	2.86	0.07	14.61	20.45	1.48			99.37	90.1049
J300*	Cpx	Huinan	Lin et al. (2019)	52.15	0.5	6.16	0.37	3.21	0.07	15.11	20.67	1.14			99.39	89.3512
J301*	Cpx	Huinan	Lin et al. (2019)	51.76	0.56	6.38	0.37	3.25	0.06	15.33	20.54	1.05			99.32	89.3709
J298*	Cpx	Huinan	Lin et al. (2019)	53.31	0.3	4.85	1.36	2.88	0.04	15.79	20.07	1.17			99.77	90.7176
J230*	Cpx	Huinan	Lin et al. (2019)	51.93	0.48	5.1	0.77	3.41	0.09	15.57	21.34	0.81			99.5	89.058
J297*	Cpx	Huinan	Lin et al. (2019)	50.66	1.07	6.62	0.57	3.52	0.07	15.28	20.7	1.04			99.54	88.5556
LG01	Cpx	Huinan	Xu et al. (2019)	51.8786	0.3548	5.1576	0.9032	2.4236	0.0696	15.9164	20.498	1.4006	0.0112	0.037	98.6506	92.13
LG02	Cpx	Huinan	Xu et al. (2019)	53.0136	0.412	5.8858	0.789	2.736	0.0806	15.5166	20.7808	1.499	0.0218	0.049	100.784	90.9986
LG03	Cpx	Huinan	Xu et al. (2019)	51.704	0.471	6.267	0.7	4.509	0.126	16.256	18.662	1.203	0.001	0.077	99.976	86.5347
LG04	Cpx	Huinan	Xu et al. (2019)	51.88	0.45	5.848	0.624	4.163	0.075	16.001	19.878	1.119	0.021	0.049	100.108	87.2635
LG05	Cpx	Huinan	Xu et al. (2019)	52.008	0.515	6.054	0.688	4.492	0.102	16.241	19.118	1.168	0.029	0.054	100.469	86.568
LG06	Cpx	Huinan	Xu et al. (2019)	52.372	0.364	5.846	0.531	3.035	0.086	16.142	20.849	1.054	0.023	0.038	100.34	90.4587
LG07	Cpx	Huinan	Xu et al. (2019)	52.525	0.309	5.548	0.545	3.109	0.091	16.114	21.081	1.082	0	0.02	100.424	90.2334
LG08	Cpx	Huinan	Xu et al. (2019)	52.43	0.512	6.518	0.634	2.948	0.108	15.431	19.893	1.52	0.007	0.056	100.057	90.32
LG09	Cpx	Huinan	Xu et al. (2019)	53.583	0.44	4.963	1.163	2.622	0.104	15.856	20.013	1.791	0.016	0.065	100.616	91.5108
LG10	Cpx	Huinan	Xu et al. (2019)	53.082	0.45	5.321	1.227	2.723	0.062	15.672	20.052	1.758	0	0.072	100.419	91.1185
LG01	Cpx	Huinan	Xu et al. (2020)	52.7	0.3	5.64	0.5	3.12	0.09	15.94	20.24	1	0	0.01	99.54	90.1059
LG02	Cpx	Huinan	Xu et al. (2020)	52.93	0.49	6.37	0.66	3.01	0.09	15.21	19.55	1.54	0	0.02	99.87	90.0075
LG03	Cpx	Huinan	Xu et al. (2020)	52.07	0.42	6.02	0.7	4.72	0.1	15.91	18.64	1.04	0	0.01	99.63	85.7317
LG04	Cpx	Huinan	Xu et al. (2020)	53.33	0.35	5.76	0.75	2.71	0.09	15.27	20.13	1.42	0	0.01	99.82	90.9454
LG05	Cpx	Huinan	Xu et al. (2020)	53.41	0.34	5.77	0.76	2.7	0.07	15.47	20.03	1.42	0	0.02	99.99	91.0821
LG06	Cpx	Huinan	Xu et al. (2020)	53.41	0.37	5.72	0.72	2.72	0.07	15.38	20.24	1.45	0	0.02	100.1	90.9741
LG07	Cpx	Huinan	Xu et al. (2020)	53.44	0.28	5.03	0.97	2.88	0.08	16.82	19.63	1.01	0	0.01	100.15	91.2362
LG08	Cpx	Huinan	Xu et al. (2020)	54.08	0.08	3.85	1.07	2.44	0.08	16.51	20.61	0.92	0	0.01	99.65	92.3439
LG09	Cpx	Huinan	Xu et al. (2020)	53.3	0.32	5.1	0.93	2.41	0.07	15.75	20.42	1.32	0	0.01	99.63	92.0945
LG11	Cpx	Huinan	Xu et al. (2020)	52.63	0.49	5.26	0.62	3.06	0.08	15.6	20.77	0.97	0	0.02	99.5	90.0868
LG12	Cpx	Huinan	Xu et al. (2020)	52.61	0.49	5.75	0.74	2.7	0.07	14.91	20.86	1.39	0	0.02	99.54	90.778
LG13	Cpx	Huinan	Xu et al. (2020)	53.1	0.38	5.82	0.64	2.77	0.08	15.1	20.85	1.26	0	0.01	100.01	90.6692
HY1-01	Cpx	Kuandian	Wu et al. (2006)	52.03	0.2	4.59	1.34	2.21	0.09	16.41	21.18	1.03	0.01	0.05	99.14	92.9756
HY2-01	Cpx	Kuandian	Wu et al. (2006)	52.55	0.1	4.57	1	2.38	0.09	16.43	21.51	1.05	0	0	99.68	92.4844
HY2-02	Cpx	Kuandian	Wu et al. (2006)	51.71	0.4	6.6	0.65	2.99	0.12	15.58	20.09	1.65	0.01	0.1	99.9	90.2803
HY2-03	Cpx	Kuandian	Wu et al. (2006)	52.16	0.58	6.09	0.85	2.34	0.03	14.7	21.36	1.85	0.01	0.06	100.03	91.802
HY2-04	Cpx	Kuandian	Wu et al. (2006)	52.31	0.24	5.73	0.65	2.72	0.13	15.89	21.64	1.27	0	0.01	100.59	91.2385
HY2-05	Cpx	Kuandian	Wu et al. (2006)	52.83	0.29	4.68	1.1	2.32	0.01	16.4	21.31	1.34	0	0.07	100.35	92.6475
HY2-06	Cpx	Kuandian	Wu et al. (2006)	52.46	0.41	5.58	0.9	2.25	0.02	15.12	21.59	1.6	0	0.03	99.96	92.2951
HY2-07	Cpx	Kuandian	Wu et al. (2006)	51.02	0.58	7.51	0.68	3.59	0.11	16.07	18.26	1.5	0	0	99.32	88.8633
HY2-14	Cpx	Kuandian	Wu et al. (2006)	51.63	0.53	5.9	1.11	2.69	0.15	15.76	20.07	1.25	0	0.07	99.16	91.2614
HY2-29	Cpx	Kuandian	Wu et al. (2006)	51.84	0.59	6.9	0.64	2.99	0.11	15.15	19.91	1.57	0	0.07	99.77	90.0319
DCT1	Cpx	Kuandian	Wang et al. (2013)	51.87	0.45	5.36	1.28	3.44	0.1	15.02	19.68	2.15			99.35	88.6145
DCT2	Cpx	Kuandian	Wang et al. (2013)	52.09	0.38	5.22	1.18	2.16	0.05	16.24	21.01	1.51			99.84	93.0566
DCT3	Cpx	Kuandian	Wang et al. (2013)	52.47	0.37	5.2	1.06	2.11	0.05	15.68	21.32	1.45			99.71	92.9808
DCT5	Cpx	Kuandian	Wang et al. (2013)	50.68	0.57	7.32	0.74	3.16	0.05	16.38	18.29	1.78			98.97	90.2343
DCT8	Cpx	Kuandian	Wang et al. (2013)	51.05	0.47	5.98	0.81	2.54	0.08	16.21	20.38	1.59			99.11	91.9199
DCT9	Cpx	Kuandian	Wang et al. (2013)	49.97	0.51	6.87	1.03	3.24	0.09	16.64	18.21	1.67			98.23	90.1525
HYS1	Cpx	Kuandian	Wang et al. (2013)	51.35	0.5	5.91	0.63	2.35	0.05	15.54	21.12	1.87			99.32	92.1799
HYS4	Cpx	Kuandian	Wang et al. (2013)	51.36	0.53	5.41	0.52	2.46	0.07	15.68	21.66	1.62			99.31	91.9107
HYS2	Cpx	Kuandian	Wang et al. (2013)	50.84	0.56	6.05	0.94	2.42	0.06	15.4	21.03	1.79			99.09	91.8986
HYS7	Cpx	Kuandian	Wang et al. (2013)	51.6	0.51	5.41	0.52	2.53	0.04	15.56	21.37	1.75			99.29	91.6409
HYS13	Cpx	Kuandian	Wang et al. (2013)	50.36	0.33	7.33	0.96	3.64	0.08	17.85	17.23	1.54			99.32	89.7345
HYS14	Cpx	Kuandian	Wang et al. (2013)	51.7	0.19	5.12	1.13	2.56	0.07	15.86	20.94	1.58			99.15	91.6967
HYS24	Cpx	Kuandian	Wang et al. (2013)	51.57	0.51	5.41	0.77	2.25	0.05	15.49	21.74	1.53			99.32	92.4653
HYS26	Cpx	Kuandian	Wang et al. (2013)	50.36	0.66	4.97	0.73	3.02	0.11	17.35	21.46	0.5			99.16	91.1039
QYS8	Cpx	Kuandian	Wang et al. (2013)	50.55	1.25	6.01	0.86	2.64	0.05	16.03	20.61	1.36			99.36	91.5423
QYS10	Cpx	Kuandian	Wang et al. (2013)	53.05	0.69	6.79	0.81	2.24	0.04	14.07	20.39	1.84			99.92	91.801
QYS14	Cpx	Kuandian	Wang et al. (2013)	51.12	1.2	6.24	0.87	2.62	0.05	15.91	20.57	1.29			99.87	91.543
QYS15	Cpx	Kuandian	Wang et al. (2013)	51.79	0.55	6.3	1.03	2.82	0.06	16.05	18.73	1.71			99.04	91.0277
QYS18	Cpx	Kuandian	Wang et al. (2013)	52.23	0.23	5.53	0.78	2.85	0.08	16.38	20.11	1.31			99.5	91.1071
KCT1	Cpx	Kuandian	Liu (2014)	53.73	0.47	1.08	0.88	4.09	0.12	17.34	21.18	0.88		0.07	99.84	88.3141
KCT2	Cpx	Kuandian	Liu (2014)	52.54	0.31	4.69	0.94	2.05	0.04	15.71	21.85	1.32		0.1	99.55	93.1789
KCT3	Cpx	Kuandian	Liu (2014)	51.39	0.53	3.13	1.29	4.36	0.08	15.64	22.54	0.62		0.07	99.65	86.4761
KCT4	Cpx	Kuandian	Liu (2014)	50.69	0.55	7.44	0.75	3.26	0.09	16.36	18.2	1.79	0.01	0.09	99.23	89.9453
KCT5	Cpx	Kuandian	Liu (2014)	51.21	0.4	5.95	0.78	2.49	0.08	16.18	20.27	1.69	0.03	0.07	99.15	92.0528
KCT6	Cpx	Kuandian	Liu (2014)	50.27	0.49	6.81	1.03	3.25	0.1	16.72	18.25	0.01	1.78	0.08	98.79	90.1677
KHY1	Cpx	Kuandian	Liu (2014)	51.08	0.54	6.34	0.71	2.4	0.07	15.29	20.96	0.01	1.9	0.06	99.36	91.907
KHY2	Cpx	Kuandian	Liu (2014)	51.13	0.6	5.81	0.58	2.5	0.07	15.27	21.26	1.81		0.06	99.09	91.588
KHY3	Cpx	Kuandian	Liu (2014)	51.27	0.62	5.56	0.7	2.32	0.06	15.48	21.42	1.58		0.08	99.09	92.2444
KHY4	Cpx	Kuandian	Liu (2014)	50.77	0.59	6.67	0.74	2.5	0.06	14.87	21.19	1.91		0.04	99.34	91.3813
KHY5	Cpx	Kuandian	Liu (2014)	50.6	0.33	7.48	0.99	3.65	0.05	17.7	17.04	1.46	0.02	0.11	99.43	89.631
KHY6	Cpx	Kuandian	Liu (2014)	52.08	0.24	4.8	0.95	2.55	0.07	15.85	20.93	1.5		0.08	99.05	91.7217
KHY7	Cpx	Kuandian	Liu (2014)	51.92	0.37	4.67	0.63	2.31	0.05	15.75	22.05	1.22	0.01	0.08	99.06	92.3976
KHY8	Cpx	Kuandian	Liu (2014)	50.87	0.63	6.83	0.61	2.87	0.06	15.33	19.55	1.87	0.01	0.08	98.71	90.4956
KQS1	Cpx	Kuandian	Liu (2014)	50.31	1.17	5.85	0.83	2.72	0.08	16.02	20.78	1.24		0.07	99.07	91.3034
KQS2	Cpx	Kuandian	Liu (2014)	52.64	0.75	6.21	0.74	2.2	0.06	15.42	20.57	1.76		0.06	100.41	92.5893
KQS3	Cpx	Kuandian	Liu (2014)	51.14	1.21	6.19	0.85	2.59	0.05	15.91	20.4	1.31		0.09	99.74	91.6318
KQS4	Cpx	Kuandian	Liu (2014)	52.18	0.25	5.61	0.75	2.99	0.07	16.49	19.85	1.3	0.01	0.08	99.58	90.7671
KQS5	Cpx	Kuandian	Liu (2014)	50.52	0.67	4.98	1.11	2.76	0.08	16.18	22.19	0.66	0.01	0.12	99.28	91.2663
far-eastern Russia (FEE)
R42-5	Cpx	Sviyagin	Guo et al. (2017)	51.8	0.4	6.54	0.8	2.75	0.11	14.89	20.53	1.18	0.01	0.04	99.06	90.6118
R42-6	Cpx	Sviyagin	Guo et al. (2017)	53.03	0.2	4.84	1.37	2.21	0.07	15.43	20.36	1.36	0.01	0.04	98.91	92.5626
R42-7	Cpx	Sviyagin	Guo et al. (2017)	51.92	0.43	6.12	0.73	2.62	0.09	14.91	20.56	1.13	0.01	0.04	98.54	91.0267
R42-8	Cpx	Sviyagin	Guo et al. (2017)	52.28	0.51	6.54	0.8	2.46	0.08	14.22	20.07	1.87	0	0.03	98.85	91.1536
R42-9	Cpx	Sviyagin	Guo et al. (2017)	52.08	0.51	7.01	0.78	2.71	0.09	14.51	19.24	1.76	0.01	0.03	98.74	90.5161
R42-10	Cpx	Sviyagin	Guo et al. (2017)	51.91	0.58	6.69	0.66	2.43	0.09	14.25	20.37	1.64	0	0.03	98.66	91.2688
R42-11	Cpx	Sviyagin	Guo et al. (2017)	51.84	0.44	6.44	0.75	2.69	0.08	14.8	20.23	1.28	0.01	0.04	98.59	90.747
R42-12	Cpx	Sviyagin	Guo et al. (2017)	51.81	0.41	6.08	0.74	2.65	0.09	14.91	20.52	1.15	0.01	0.04	98.41	90.9333
Sv-1	Cpx	Sviyagin	Ionov et al. (2020)	52.233	0.604667	7.112	0.876333	2.55367	0.0636667	14.5283	20.3347	1.98567			100.292	91.0244
Sv-2	Cpx	Sviyagin	Ionov et al. (2020)	52.2207	0.557333	7.32467	0.863333	2.58533	0.095	14.272	19.9103	2.17667			100.005	90.7752
Sv-4	Cpx	Sviyagin	Ionov et al. (2020)	52.4897	0.428	6.89033	1.097	2.45067	0.077	14.5983	20.3653	1.94233			100.339	91.393
Sv-7	Cpx	Sviyagin	Ionov et al. (2020)	52.5045	0.374	6.17225	1.13775	2.40275	0.077	14.998	20.6547	1.60475			99.9257	91.7537
Sv-8	Cpx	Sviyagin	Ionov et al. (2020)	52.3392	0.518	6.87925	1.0975	2.49575	0.083	14.3963	20.2885	1.97475			100.072	91.1366
Sv-9	Cpx	Sviyagin	Ionov et al. (2020)	52.004	0.653667	7.00967	0.647333	2.79967	0.0716667	14.288	20.6153	1.86267			99.952	90.0963
Sv-12	Cpx	Sviyagin	Ionov et al. (2020)	51.586	0.557667	7.477	0.882	2.53067	0.0613333	14.55	20.9063	1.873			100.449	91.1101
Sv-13	Cpx	Sviyagin	Ionov et al. (2020)	51.7443	0.594	6.62067	0.792	2.64767	0.106	14.7747	21.4693	1.578			100.33	90.8652
Sv-14	Cpx	Sviyagin	Ionov et al. (2020)	52.312	0.2245	6.3285	1.3105	2.38	0.0675	14.4385	20.657	1.754			99.4725	91.5355
Sv-15	Cpx	Sviyagin	Ionov et al. (2020)	51.9727	0.514667	7.028	0.894333	2.544	0.095	14.353	20.9367	1.76433			100.103	90.9559
Sv-16	Cpx	Sviyagin	Ionov et al. (2020)	51.695	0.564667	6.91333	0.788667	2.77633	0.0643333	14.7033	21.4433	1.77167			100.757	90.4217
Sv-17	Cpx	Sviyagin	Ionov et al. (2020)	52.4048	0.3374	6.711	1.0604	2.6646	0.081	15.3558	19.8902	2.0088			100.526	91.129
Sv-18	Cpx	Sviyagin	Ionov et al. (2020)	51.791	0.552	6.9475	0.9435	2.732	0.0995	14.703	20.393	1.6105			99.772	90.5601
Sv-19	Cpx	Sviyagin	Ionov et al. (2020)	52.101	0.583333	7.381	0.818667	2.485	0.0756667	14.1727	20.3427	2.009			99.969	91.0446
Sv-20	Cpx	Sviyagin	Ionov et al. (2020)	52.304	0.432333	6.69067	1.35967	2.42333	0.0283333	14.5827	20.24	2.09667			100.179	91.4725
Sv-21	Cpx	Sviyagin	Ionov et al. (2020)	51.9557	0.467	6.97633	0.806667	2.47867	0.073	14.4973	20.639	1.802			99.6957	91.2479
Sv-22	Cpx	Sviyagin	Ionov et al. (2020)	51.439	0.477667	6.54633	0.701333	2.94533	0.0736667	15.41	21.1673	1.41667			100.214	90.316
Sv-24	Cpx	Sviyagin	Ionov et al. (2020)	51.559	0.5705	7.28	0.901	3.037	0.0815	15.255	19.904	1.939			100.581	89.9536
Sv-27	Cpx	Sviyagin	Ionov et al. (2020)	51.651	0.4945	7.123	0.959	2.5155	0.0945	14.664	21.563	1.7925			100.895	91.2214
Sv-28	Cpx	Sviyagin	Ionov et al. (2020)	52.213	0.597333	7.42733	0.902	2.707	0.0723333	14.8473	20.4513	1.92633			101.184	90.7209
Sv-29	Cpx	Sviyagin	Ionov et al. (2020)	52.024	0.637	7.41533	0.742667	2.86933	0.084	15.1267	20.366	1.90167			101.218	90.3821
Sv-32	Cpx	Sviyagin	Ionov et al. (2020)	53.2875	0.2685	5.2495	1.395	2.376	0.0935	14.793	20.279	1.5665			99.3585	91.7343
Sv-36	Cpx	Sviyagin	Ionov et al. (2020)	53.1765	0.204	5.6015	0.8895	2.765	0.072	15.5745	20.8785	0.907			100.124	90.9426
Pod-1	Cpx	Podgelban	Ionov et al. (2020)	52.914	0.567	6.81467	1.012	2.63467	0.091	14.2173	20.111	1.67867			100.081	90.583
Pod-2	Cpx	Podgelban	Ionov et al. (2020)	52.743	0.564333	6.99033	0.852333	2.79433	0.091	14.1467	20.2783	1.617			100.117	90.0243
Pod-3	Cpx	Podgelban	Ionov et al. (2020)	51.657	0.631	7.24133	0.730333	3.331	0.115333	14.72	19.3413	1.70767			99.5443	88.7353
Pod-4	Cpx	Podgelban	Ionov et al. (2020)	51.6393	0.637	7.28667	0.859	3.12367	0.104333	14.461	19.318	1.862			99.3343	89.1919
Pod-5	Cpx	Podgelban	Ionov et al. (2020)	53.1195	0.619	6.9925	0.894	2.8535	0.086	14.124	20.184	1.7335			100.654	89.8199
Cpx, clinopyroxene. Mg# = 100×Mg/(Mg +Fetotal) molar.
References
Guo, P., Xu, W. L., Wang, C. G., Wang, F., Ge, W. C., Sorokin, A. A. & Wang, Z. W. (2017). Age and evolution of the lithospheric mantle beneath the Khanka Massif: geochemical and Re–Os isotopic evidence from Sviyagino mantle xenoliths. Lithos 282-283, 326-338.
Guo, P., Ionov, D. A., Xu, W. L., Wang, C. G. & Luan, J. P. (2020). Mantle and recycled oceanic crustal components in mantle xenoliths from northeastern china and their mantle sources. Journal of Geophysical Research: Solid Earth 125.
Ionov, D. A., Guo, P., Nelson, W. R., Shirey, S. B. & Willbold, M. (2020). Paleoproterozoic melt-depleted lithospheric mantle in the Khanka block, far eastern Russia: Inferences for mobile belts bordering the North China and Siberian cratons. Geochimica et Cosmochimica Acta 270, 95-111.
Hao, Y. T., Xia, Q. K., Jia, Z. B., Zhao, Q. C., Li, P., Feng, M. & Liu, S. C. (2016). Regional heterogeneity in the water content of the Cenozoic lithospheric mantle of Eastern China. Journal of Geophysical Research: Solid Earth 121, 517-537.
Lin, A. B., Zheng, J. P., Xiong, Q., Aulbach, S., Lu, J. G., Pan, S. K., Dai, H. K. & Zhang, H. (2019). A refined model for lithosphere evolution beneath the decratonized northeastern North China Craton. Contributions to Mineralogy and Petrology 174, 15.
Liu, J. L. (2014). Comparative study on nature of subcontinental lithosphere mantle in northeastern margin of the North China Craton and Northeast Orogenic Belt. Doctoral thesis. (In Chinese with English abstract)
Pan, S. K., Zheng, J. P., Chu, L. L. & Griffin, W. L. (2013). Coexistence of the moderately refractory and fertile mantle beneath the eastern Central Asian Orogenic Belt. Gondwana Research 23, 176-189.
Pan, S. K., Zheng, J. P., Griffin, W. L., Xu, Y. X. & Li, X. Y. (2015). Nature and evolution of the lithospheric mantle beneath the eastern Central Asian Orogenic Belt: Constraints from peridotite xenoliths in the central part of the Great Xing'an Range, NE China. Lithos 238, 52-63.
Park, K., Choi, S. H., Cho, M. & Lee, D. C. (2017). Evolution of the lithospheric mantle beneath Mt. Baekdu (Changbaishan): Constraints from geochemical and Sr–Nd–Hf isotopic studies on peridotite xenoliths in trachybasalt. Lithos 286, 330-344.
Song, Y., Wang, J., Liu, J. L., Xie, Z. P. & Hattori, K. H. (2013). Mineral chemistry of mantle xenoliths in Cenozoic basalts from Wangqing, eastern Jilin: implications for formation of newly accreted sub-continental mantle earth. Science Frontiers 20, 96-107. (In Chinese with English abstract)
Tang, Y. J., Zhang, H. F., Deloule, E., Su, B. X., Ying, J. F., Xiao, Y. & Hu, Y. (2012). Slab-derived lithium isotopic signatures in mantle xenoliths from northeastern North China Craton. Lithos 149, 79-90.
Tian, G. C., Liu, J. G., Scott, J. M., Chen, L. H., Pearson, D. G., Chu, Z. Y., Wang, Z. C. & Luo Y. (2020). Architecture and evolution of the lithospheric roots beneath circum-cratonic orogenic belts–the Xing’an Mongolia Orogenic Belt and its relationship with adjacent North China and Siberian cratonic roots. Lithos (submitted).
Wang, J., Hattori, K. H. & Xie, Z. P. (2013). Oxidation state of lithospheric mantle along the northeastern margin of the North China Craton: implications for geodynamic processes. International Geology Review 55, 1418-1444.
Wu, F. Y., Walker, R. J., Yang, Y. H., Yuan, H. L. & Yang, J. H. (2006). The chemical-temporal evolution of lithospheric mantle underlying the North China Craton. Geochimica et Cosmochimica Acta 70, 5013-5034.
Xu, Q. H., Liu, J. Q., He, H. Y. & Zhang, Y. H. (2019). Nature and evolution of the lithospheric mantle revealed by water contents and He-Ar isotopes of peridotite xenoliths from Changbaishan and Longgang basalts in Northeast China. Science Bulletin 64, 1325-1335.
Xu, Q. H., Liu, J. Q., Mo, X. X., He, H. Y., Zhang, Y. H. & Zhao, W. B. (2020). Characteristics of the lithospheric mantle revealed by peridotite xenoliths from Changbaishan volcanic rocks. Acta Petrologica Sinica 36, 2047-2066. (In Chinese with English abstract)
Xu, Y. G., Ross, J. V. & Mercier, J. C. C. (1993). The upper mantle beneath the continental rift of Tanlu, Eastern China: evidence for the intra-lithospheric shear zones. Tectonophysics 225, 337-360.
Xu, Y. G., Menzies, M. A., Vroon, P., Mercier, J. C. & Lin, C. Y. (1998). Texture–temperature–geochemistry relationships in the upper mantle as revealed from spinel peridotite xenoliths from Wangqing, NE China. Journal of Petrology 39, 469-493.
Xu, Y. G., Menzies, M. A., Thirlwall, M. F., Huang, X. L., Liu, Y. & Chen, X. M. (2003). “Reactive” harzburgites from Huinan, NE China: products of the lithosphere-asthenosphere interaction during lithospheric thinning? Geochimica et Cosmochimica Acta 67, 487-505.
Yu, S. Y., Xu, Y. G., Huang, X. L., Ma, J. L., Ge, W. C., Zhang, H. H. & Qin, X. F. (2009). Hf–Nd isotopic decoupling in continental mantle lithosphere beneath Northeast China: effects of pervasive mantle metasomatism. Journal of Asian Earth Sciences 35, 554-570.
Zhang, M., Yang, J. H., Sun, J. F., Wu, F. Y. & Zhang, M. (2012). Juvenile subcontinental lithospheric mantle beneath the eastern part of the Central Asian Orogenic Belt. Chemical Geology 328, 109-122.
Zhang, Y. L (2011). Isotopic compositions of the peridotite xenoliths and age of the subcontinental lithospheric mantle in the Great Xing'an Range. Doctoral thesis. (In Chinese with English abstract)
Zhang, Y. L., Liu, C. Z., Ge, W. C., Wu, F. Y. & Chu, Z. Y. (2011). Ancient sub-continental lithospheric mantle (SCLM) beneath the eastern part of the Central Asian Orogenic Belt (CAOB): Implications for crust–mantle decoupling. Lithos 126, 233-247.
Zhang, Y. L., Ge, W. C., Sun, J., Yang, H., Liu, Z. C. & Liu, J. G. (2019). Age and composition of the subcontinental lithospheric mantle beneath the Xing'an–Mongolia Orogenic Belt: Implications for the construction of microcontinents during accretionary orogenesis. Lithos 326, 556-571.
Zhao, Y. W. & Fan, Q. C. (2011). Characteristics of lithospheric mantle beneath the Great Xing'an Range: evidence from spinel peridotite xenoliths in the Halaha River and Chaoer River area. Acta Petrologica Sinica 27, 2833-2841. (In Chinese with English abstract)
Zhou, Q., Wu, F. Y., Chu, Z. Y., Yang, Y. H., Sun, D. Y. & Ge, W. C. (2007). Sr-Nd-Hf-Os isotopic characterizations of the Jiaohe peridotite xenoliths in Jilin province and constraints on the lithospheric mantle age in northeastern China. Acta Petrologica Sinica 23, 1269-1280. (In Chinese with English abstract)
Zhou, Q., Wu, F. Y., Chu, Z. Y. & Ge, W. C. (2010). Isotopic compositions of mantle xenoliths and age of the lithospheric mantle in Yitong, Jilin Province. Acta Petrologica Sinica 26, 1241-1264. (In Chinese with English abstract)

## Sheet: Ref. Sp
Sample	Mineral	Locality	Reference	SiO2	TiO2	Al2O3	Cr2O3	FeO	MnO	MgO	CaO	Na2O	K2O	NiO	Total	Mg#	Cr#
northwestern NEC
KL3-10	Sp	Keluo	Zhang et al. (2011)	0	0.11615	44.9501	21.4147	14.6501	0.138033	18.1413	0	0.00639667	0.00707	0.26563	99.6894	68.8216	24.2191
KL3-24	Sp	Keluo	Zhang et al. (2011)	0.00433333	0.283	37.017	28.6203	15.5307	0.209	17.2573	0	0.0176667	0.0106667	0.228333	99.1783	66.4512	34.1529
KL3-26	Sp	Keluo	Zhang et al. (2011)	0.00169167	0.055825	51.903	14.1044	12.9768	0.150558	19.6132	0.01015	0.055825	0.00609	0.325815	99.2034	72.9303	15.4189
KL3-27-1	Sp	Keluo	Zhang et al. (2011)	0.07725	1.59959	42.1538	20.9615	18.3433	0.20188	15.8641	0.0309	0.06283	0.02781	0.37595	99.6989	60.6552	25.014
KL3-27-2	Sp	Keluo	Zhang et al. (2011)	0	1.637	14.638	34.679	38.858	0.479	8.29	0.103	0.039	0.047	0.472	99.242	27.5515	61.3793
KL3-28		Keluo	Zhang et al. (2011)
KL3-30	Sp	Keluo	Zhang et al. (2011)	0.0115	0.1545	26.2015	37.8945	20.0825	0.2565	14.173	0	0.0275	0.01	0.1565	98.968	55.7133	49.2441
KL3-31	Sp	Keluo	Zhang et al. (2011)	0.00206	0.035535	51.3635	14.2217	13.5296	0.139565	19.6812	0.005665	0.03708	0.003605	0.31209	99.3317	72.1685	15.6648
KL3-38	Sp	Keluo	Zhang et al. (2011)	0.005075	0.049735	46.7651	17.9273	16.0191	0.166122	17.9821	0.00575167	0.0581933	0.0135333	0.303147	99.2951	66.6777	20.4559
KL3-40	Sp	Keluo	Zhang et al. (2011)	0.01414	0.47773	19.5324	39.1314	24.6905	0.2929	14.8581	0.00303	0.00909	0	0.22826	99.2375	51.7537	57.3372
KL3-41	Sp	Keluo	Zhang et al. (2011)	0.00136	0.03366	54.0515	12.8772	11.848	0.1275	20.4561	0.04148	0.02448	0	0.3281	99.7893	75.4761	13.7797
KL3-49	Sp	Keluo	Zhang et al. (2011)	0	0.05	38.446	27.174	16.2367	0.213667	16.9613	0	0.034	0.00333333	0.211667	99.3307	65.0607	32.1645
KL3-53	Sp	Keluo	Zhang et al. (2011)	0	0.1025	32.1645	31.399	20.105	0.2485	15.074	0	0.0285	0.0195	0.18675	99.3282	57.2008	39.5724
KL3-56	Sp	Keluo	Zhang et al. (2011)	0.00576867	0.0760107	55.0137	10.7993	12.894	0.132001	20.0407	0	0.0352907	0.004072	0.372249	99.3731	73.4787	11.6363
08KL-01	Sp	Keluo	Zhang et al. (2011)	0.0185	0.078	47.9915	18.5635	15.0945	0.195	17.597	0.0095	0.0185	0.023	0.214	99.803	67.5122	20.6025
08KL-02	Sp	Keluo	Zhang et al. (2011)	0.115667	0.736333	12.253	53.7223	18.8143	0.288333	13.137	0.035	0.0156667	0.0563333	0.117667	99.2917	55.4498	74.6272
08KL-03		Keluo	Zhang et al. (2011)
08KL-04	Sp	Keluo	Zhang et al. (2011)	0.0226667	0.066	57.469	9.58733	12.765	0.0743333	19.0607	0.011	0.0163333	0.000666667	0.418	99.491	72.6903	10.0649
08KL-05	Sp	Keluo	Zhang et al. (2011)	0.0223333	0.135333	47.398	19.2357	14.7867	0.129333	17.944	0.0166667	0.00533333	0.005	0.316667	99.995	68.3862	21.399
08KL-07	Sp	Keluo	Zhang et al. (2011)	0.0416667	0.459333	31.8407	33.9563	16.251	0.154	16.6437	0.0166667	0.0573333	0	0.243333	99.664	64.6096	41.705
08KL-09	Sp	Keluo	Zhang et al. (2011)	0.037	0.012	57.7395	7.634	14.617	0.104	18.6525	0.0055	0	0.013	0.4375	99.252	69.4627	8.14687
08KL-10	Sp	Keluo	Zhang et al. (2011)	0.0163333	0.0853333	56.753	10.007	12.973	0.093	18.9637	0.0133333	0.011	0.017	0.403667	99.3363	72.2661	10.5774
08KL-11	Sp	Keluo	Zhang et al. (2011)	0.051	0.787333	23.4487	40.4343	21.7083	0.268	13.0903	0.009	0.00633333	0.00166667	0.193333	99.9983	51.8048	53.6345
08KL-12	Sp	Keluo	Zhang et al. (2011)	0.011	0.1765	48.904	18.2105	14.1555	0.1485	17.7255	0.0125	0.0065	0.0065	0.233	99.59	69.0605	19.9873
08KL-13	Sp	Keluo	Zhang et al. (2011)	0.0045	0.288	26.9665	36.715	22.0373	0.219	13.297	0.017	0.0095	0.0195	0.20025	99.7735	51.8205	47.7356
09NMB33	Sp	Nuomin	Hao et al. (2016)	0.06	0.85	27.49	36.5	14.83	0.17	16.66					96.56	66.6946	47.1098
09NMB36	Sp	Nuomin	Hao et al. (2016)	0.09	1.76	36.41	26.26	14.27	0.14	17.66					96.59	68.8087	32.6068
09NMB37	Sp	Nuomin	Hao et al. (2016)	0.08	0.55	25.13	39.43	13.93	0.19	16.65					95.96	68.0574	51.2806
09NMB38	Sp	Nuomin	Hao et al. (2016)	0.08	0.12	18.88	48.67	11.82	0.24	16.98					96.79	71.9158	63.3609
09NMB40	Sp	Nuomin	Hao et al. (2016)	0.04	0.78	26.02	38.39	14.24	0.16	16.32					95.95	67.1369	49.7426
09NMB41	Sp	Nuomin	Hao et al. (2016)	0.09	0.11	37.54	28.33	11.25	0.12	19.06					96.5	75.1246	33.6102
09NMB42	Sp	Nuomin	Hao et al. (2016)	0.06	0.52	19.9	44.91	15.45	0.18	14.4					95.42	62.4259	60.2217
09NMB49	Sp	Nuomin	Hao et al. (2016)	0.06	0.12	40.72	24.41	12.19	0.11	19.54					97.15	74.0755	28.6805
NM2-01		Nuomin	Zhang et al. (2019)
NM2-02	Sp	Nuomin	Zhang et al. (2019)	0.1	0.61	31.98	29.63	15.14	0.2	18.38	0.02	0.04	0.01	0.27	96.37	68.3947	38.3303
NM2-04	Sp	Nuomin	Zhang et al. (2019)	0.09	0.94	36	30.27	11.77	0.21	19.55		0.01		0.27	99.11	74.7527	36.0639
NM2-07	Sp	Nuomin	Zhang et al. (2019)	0.12	1.76	34.25	31.96	9.39	0.16	21.2	0.02	0.01	0.01	0.29	100.12	80.0975	38.4988
NM2-20	Sp	Nuomin	Zhang et al. (2019)	0.02	0.06	57.71	9.94	10.38	0.12	20.44		0.01		0.35	99.04	77.8278	10.3578
NM2-23	Sp	Nuomin	Zhang et al. (2019)	0.18	0.69	31.41	33.76	13.64	0.21	18.22	0.01	0.03	0.01	0.24	98.39	70.4238	41.8952
NM2-24		Nuomin	Zhang et al. (2019)
NM2-27	Sp	Nuomin	Zhang et al. (2019)	0.11	1.46	38.28	26.19	15.86	0.19	17.36	0.01			0.34	99.79	66.1148	31.4583
NM2-29	Sp	Nuomin	Zhang et al. (2019)	0.08	1.45	31.75	28.26	13.46	0.24	17.27		0.02	0.01	0.31	99.93	69.5783	37.3864
NM2-34		Nuomin	Zhang et al. (2019)
NM2-37		Nuomin	Zhang et al. (2019)
NM2-39	Sp	Nuomin	Zhang et al. (2019)	0.02	0.11	56.71	10.84	11.03	0.15	19.6	0.02		0.02	0.35	98.86	76.0051	11.3655
NM2-48	Sp	Nuomin	Zhang et al. (2019)	0.11	0.24	36.53	28.83	13.76	0.2	18.72	0.01	0.07		0.28	98.75	70.8038	34.6164
NM2-50	Sp	Nuomin	Zhang et al. (2019)	0.81	0.23	39	27.49	10.83	0.2	20.02	0.06	0.14	0.02	0.27	99.06	76.718	32.1046
NM2-51	Sp	Nuomin	Zhang et al. (2019)	0.07	0.16	37.97	27.85	12.64	0.18	19.46		0.01	0.01	0.32	98.66	73.293	32.9778
NM2-55	Sp	Nuomin	Zhang et al. (2019)		0.08	52.85	12.93	11.58	0.15	19.74	0.01	0.02		0.39	97.75	75.2393	14.0985
NM2-56	Sp	Nuomin	Zhang et al. (2019)
BLS01A		Nuomin	Tian et al. (2020)
BLS02A		Nuomin	Tian et al. (2020)
BLS02B		Nuomin	Tian et al. (2020)
BLS03		Nuomin	Tian et al. (2020)
BLS06B		Nuomin	Tian et al. (2020)
BLS07		Nuomin	Tian et al. (2020)
BLS09		Nuomin	Tian et al. (2020)
BLS10	Sp	Nuomin	Tian et al. (2020)	0.0814286	0.18	42.84	22.9086	13.57	0.165714	19.1529	0.01	0.0175	0.0075	0.374286	99.3079	71.5579	55.6444
BLS12A		Nuomin	Tian et al. (2020)
BLS16		Nuomin	Tian et al. (2020)
BLS18		Nuomin	Tian et al. (2020)
BLS19		Nuomin	Tian et al. (2020)
BLS20		Nuomin	Tian et al. (2020)
BLS21	Sp	Nuomin	Tian et al. (2020)	0.075	0.7925	40.2075	23.9625	15.71	0.22	18.1125	0.0125	0.0166667		0.4025	99.5117	67.2684	52.9552
BLS24		Nuomin	Tian et al. (2020)
BLS25		Nuomin	Tian et al. (2020)
BLS27	Sp	Nuomin	Tian et al. (2020)	0.115	1.15	34.435	27.73	18.18	0.215	16.855	0.015	0.01	0.01	0.455	99.17	62.3017	45.4462
BLS29		Nuomin	Tian et al. (2020)
BLS30	Sp	Nuomin	Tian et al. (2020)	0.11	0.9	31.21	32.86	16.52	0.23	16.33			0	0.35	98.51	63.795	38.9186
BLS31		Nuomin	Tian et al. (2020)
BLS33		Nuomin	Tian et al. (2020)
BLS34	Sp	Nuomin	Tian et al. (2020)	0.0733333	0.223333	29.8167	37.6367	14.7	0.226667	16.8233	0.01	0.015	0.01	0.29	99.825	67.1056	34.7028
BLS35A		Nuomin	Tian et al. (2020)
BLS38A	Sp	Nuomin	Tian et al. (2020)	0.09	0.246667	37.73	27.33	15.4067	0.166667	18.0233	0.015	0.00666667	0.01	0.3	99.325	67.5883	48.0823
BLS39A		Nuomin	Tian et al. (2020)
BLS40		Nuomin	Tian et al. (2020)
NMH01		Nuomin	Tian et al. (2020)
NMH03		Nuomin	Tian et al. (2020)
NMH04		Nuomin	Tian et al. (2020)
NMH06		Nuomin	Tian et al. (2020)
NMH09		Nuomin	Tian et al. (2020)
XSFS01		Nuomin	Tian et al. (2020)
XSFS06		Nuomin	Tian et al. (2020)
XSFS07		Nuomin	Tian et al. (2020)
CH01-01	Sp	Halaha	Zhang (2011)	0.01	0.8	46.57	15.68	20.46	0.29	15.99	0	0.02	0.01	0.14	99.97	58.2134	18.4322
CH01-02	Sp	Halaha	Zhang (2011)	0.28	1.56	17.56	30.84	39.94	0.37	7.89	0.02	0.06	0.02	0.22	98.76	26.043	54.1013
CH01-04	Sp	Halaha	Zhang (2011)	0.12	0.17	9.68	57.54	18.34	0.25	13.25	0.02	0.01	0.02	0.15	99.55	56.2905	79.9577
CH01-05		Halaha	Zhang (2011)
CH01-07	Sp	Halaha	Zhang (2011)	2.16	0.79	35.17	28.35	16.26	0.22	15.94	0.31	0.54	0.12	0.23	100.09	63.6029	35.1071
CH01-08	Sp	Halaha	Zhang (2011)	0.21	0.31	32.4	34.19	14.34	0.18	17.15	0.04	0.04	0	0.26	99.12	68.07	41.4597
CH01-09	Sp	Halaha	Zhang (2011)	0.09	0.72	40.2	26.28	14.79	0.16	17.23	0.09	0.01	0.02	0.33	99.92	67.4969	30.4952
CH01-10		Halaha	Zhang (2011)
CH01-11	Sp	Halaha	Zhang (2011)	0.27	0.23	24.2	45.29	14.74	0.18	16.06	0.05	0.05	0	0.18	101.25	66.0116	55.6746
CH02-01	Sp	Halaha	Zhang (2011)	0.1	0.49	26.22	40.09	16.86	0.23	15.35	0	0.02	0	0.29	99.65	61.8743	50.6459
CH02-04	Sp	Halaha	Zhang (2011)	0.14	0.46	28.71	33.78	19.8	0.19	15.62	0.02	0.01	0.01	0.34	99.08	58.4413	44.1237
CH02-05		Halaha	Zhang (2011)
03CH-01		Halaha	Zhang (2011)
03CH-02		Halaha	Zhang (2011)
03CH-03		Halaha	Zhang (2011)
03CH-04		Halaha	Zhang (2011)
03CH-05	Sp	Halaha	Zhang (2011)	0	0.11	54.18	14.87	10.75	0.13	19.02	0	0.08	0	0.28	99.42	75.9261	15.5548
03CH-06	Sp	Halaha	Zhang (2011)	0.9	0.27	55.52	11.15	11.91	0.25	19.86	0.22	0.06	0.04	0.08	100.26	74.8264	11.8776
03CH-07		Halaha	Zhang (2011)
03CH-08	Sp	Halaha	Zhang (2011)	0.17	0.55	34.45	32.55	14.02	0.15	17.29	0.03	0	0	0.26	99.47	68.7335	38.8054
03CH-10	Sp	Halaha	Zhang (2011)	0.08	0.41	27.6	41.26	12.94	0.21	16.32	0	0.04	0.01	0.21	99.08	69.2134	50.0828
03CH-13	Sp	Halaha	Zhang (2011)	0.13	0.53	27.42	39.31	14.99	0.18	16.29	0.03	0.03	0	0.17	99.08	65.9533	49.0361
03CH-15		Halaha	Zhang (2011)
GW04226	Sp	Halaha	Zhang (2011)	0.03	0.09	58.61	8.98	10.89	0.1	20.32	0.02	0.01	0.02	0.41	99.48	76.8846	9.32424
GW04227		Halaha	Zhang (2011)
GW04229		Halaha	Zhang (2011)
GW04240	Sp	Halaha	Zhang (2011)	0.17	0.16	34.89	31.99	14.71	0.16	17.27	0.01	0.04	0	0.3	99.7	67.6666	38.0944
07DLH04	Sp	Halaha	Zhao & Fan (2011)	0.11	0.04	7.83	58.22	19.77	0.29	14.05	0	0	0	0.14	100.44	55.8852	83.3
07DLH05	Sp	Halaha	Zhao & Fan (2011)	0.12	0.27	28.6	37.61	14.62	0.15	17.06	0	0	0.02	0.32	98.77	67.533	46.87
07HXD01	Sp	Halaha	Zhao & Fan (2011)	0.19	0.2	23.4	43.08	16.5	0.22	16.73	0	0.01	0.01	0.24	100.58	64.3799	55.2579
07HXD03		Halaha	Zhao & Fan (2011)
07HXD05	Sp	Halaha	Zhao & Fan (2011)	0.11	0.14	8.45	59.16	17.94	0.29	13.68	0	0	0	0.06	99.82	57.614	82.4458
07TFL01	Sp	Halaha	Zhao & Fan (2011)	0	0.19	7.84	59.01	21.45	0.31	12.32	0	0.03	0.01	0.14	101.29	50.5886	83.469
07TFL03	Sp	Halaha	Zhao & Fan (2011)	0	0.03	19.52	49.24	18.53	0.3	13.55	0	0.01	0.01	0.07	101.24	56.5875	62.8559
08TFL02	Sp	Halaha	Zhao & Fan (2011)	0	0.11	40.29	28.15	14.35	0.16	16.54	0	0	0	0.18	99.78	67.2624	31.9128
08TFL07	Sp	Halaha	Zhao & Fan (2011)	0.05	0.14	23.42	46.76	16.1	0.23	13.16	0	0	0	0.14	99.98	59.3007	57.2537
07WNP01	Sp	Halaha	Zhao & Fan (2011)	0.08	0.22	51.91	15.59	10.23	0.13	20.43	0	0.01	0.02	0.28	98.89	78.0696	16.7687
07WNP07	Sp	Halaha	Zhao & Fan (2011)	0.08	0.2	35.02	32.1	14.51	0.16	17.79	0	0.01	0.02	0.31	100.19	68.6078	38.0768
07TFL04	Sp	Halaha	Zhao & Fan (2011)	0.03	0.02	57.82	9.47	10.76	0.11	20.41	0	0	0	0.36	99	77.1753	9.89957
07TFL06	Sp	Halaha	Zhao & Fan (2011)	0.07	0.02	54.32	9.93	13.14	0.11	20.09	0	0.02	0	0.35	98.06	73.1571	10.9237
07DCH01	Sp	Halaha	Zhao & Fan (2011)	0	0.06	57.72	10.55	10.79	0.16	20.72	0	0.02	0	0.31	100.33	77.3911	10.9223
07DCH02	Sp	Halaha	Zhao & Fan (2011)	0	0.05	57.02	10.67	10.82	0.05	20.18	0	0.01	0	0.36	99.15	76.8763	11.1531
08WNP08		Halaha	Zhao & Fan (2011)
08TFL06	Sp	Halaha	Zhao & Fan (2011)	0	0.07	58.74	9.01	12.13	0.13	19.83	0	0	0	0.46	100.37	74.4513	9.32981
TFL-04	Sp	Halaha	Liu (2014)	0.05	0.19	49.46	18.38	11.55	0.14	20.15					99.92	75.668	19.9547
TFL-07	Sp	Halaha	Liu (2014)	0.04		37.19	31.5	13.81	0.14	16.77		0.07			99.52	68.4006	36.2327
0098-10-1	Sp	Halaha	Liu (2014)	0.07	2.19	25.05	35.09	21.21	0.3	14.54	0.06		0.02		98.53	54.9952	48.4459
0098-10	Sp	Halaha	Liu (2014)	0.09	0.49	38	28.49	13.82	0.24	18.82	0.04	0.02			100.01	70.824	33.4643
0098-13	Sp	Halaha	Liu (2014)	0.14	0.23	26.83	34.04	21.22	0.22	18.46					101.14	60.7951	45.9784
0098-19	Sp	Halaha	Liu (2014)	0.03	0.09	40.14	28.11	12.94	0.19	18.53		0.03			100.06	71.8516	31.9629
TXT-04	Sp	Halaha	Liu (2014)	0.14	1.79	12.07	41.85	35.72	0.26	6.3	0.03		0.02		98.18	23.9192	69.9337
TFL-08	Sp	Halaha	Liu (2014)	0.04	0.14	41.33	23.76	16.4	0.1	17.34			0.01		99.12	65.3346	27.8319
0098-06	Sp	Halaha	Liu (2014)	0.02		58.73	7.71	11.05	0.03	20.94		0.02			98.5	77.1584	8.09387
0098-15	Sp	Halaha	Liu (2014)		0.06	55.06	7.89	15.79	0.11	21.81					100.72	71.1163	8.76993
0098-17	Sp	Halaha	Liu (2014)	0.06	0.28	53.48	12.94	12.9	0.15	19.84	0.02				99.67	73.273	13.9648
TXT-02	Sp	Halaha	Liu (2014)	0.1	0.64	35	26.53	17.32	0.21	18.67		0.04			98.51	65.7709	33.7088
AS01	Sp	Halaha	Pan et al. (2015)	0.029	0.08825	56.7893	9.04875	11.7308	0.083	20.147	0.0065			0.3495	98.4292	75.3782	9.65684
AS02	Sp	Halaha	Pan et al. (2015)	0.011	0.0673333	48.0907	19.3693	11.559	0.12	19.052	0.00766667			0.286	98.702	74.6069	21.2717
AS03		Halaha	Pan et al. (2015)
AS04	Sp	Halaha	Pan et al. (2015)	0.131	0.6565	41.7975	22.7695	14.7015	0.0965	18.3955	0.0085			0.338	98.963	69.0446	26.7637
AS05	Sp	Halaha	Pan et al. (2015)	0.11925	0.77325	40.5975	23.354	14.618	0.08625	18.1687	0.00775			0.28	98.0932	68.901	27.8449
AS07	Sp	Halaha	Pan et al. (2015)	0.1295	0.313	20.1695	45.0285	19.8775	0.187	12.9515	0.008			0.234	98.9605	53.7348	59.9623
DHG01	Sp	Halaha	Pan et al. (2015)	0.06925	1.295	36.8468	23.4558	19.1917	0.132	16.173	0.00225			0.35275	97.6322	60.0347	29.9248
DHG02	Sp	Halaha	Pan et al. (2015)	0.075	1.11425	37.5555	23.358	19.1227	0.119	16.3047	0.0035			0.3045	98.0835	60.3154	29.44
DHG04		Halaha	Pan et al. (2015)
DHG09	Sp	Halaha	Pan et al. (2015)	0.14425	0.0595	30.7148	35.3505	16.6118	0.151	15.4603	0.0545			0.2175	98.8248	62.3917	43.5693
DHG11	Sp	Halaha	Pan et al. (2015)	0.1222	1.4192	13.3522	49.5196	18.2192	0.1568	14.0462	0.0028			0.204	97.0868	57.8818	71.3299
DHG12	Sp	Halaha	Pan et al. (2015)	0.1685	0.35675	31.4093	34.5847	14.99	0.121	17.2993	0.00275			0.271	99.2575	67.2899	42.4844
DHG13	Sp	Halaha	Pan et al. (2015)	0.14375	0.4525	31.5505	34.2125	15.0773	0.1395	17.015	0.00325			0.26	98.9095	66.7956	42.1108
DHG05	Sp	Halaha	Pan et al. (2015)	0.155	0.119	26.6813	39.7153	14.847	0.149667	16.1703	0.009			0.202333	98.105	66.003	49.9636
DHG14	Sp	Halaha	Pan et al. (2015)	0.227	0.1415	31.9835	33.7585	13.7045	0.0935	17.49	0.0115			0.291	97.7555	69.465	41.4543
A2-2	Sp	Abaga	Zhang et al. (2012)		0.05	56.5	12.4	11.4	0.12	19.4				0.35	100.22	75.2074	12.8334
A2-1	Sp	Abaga	Zhang et al. (2012)		0.19	40.3	27.8	14.4	0.2	17.4				0.27	100.56	68.2934	31.6362
A2-10	Sp	Abaga	Zhang et al. (2012)		0.1	56.5	11.2	11.8	0.12	19.8				0.34	99.86	74.944	11.7372
A2-11	Sp	Abaga	Zhang et al. (2012)		0.1	55.8	12.6	12	0.12	19.8				0.39	100.81	74.6271	13.1552
ABG08	Sp	Abaga	Zhang et al. (2012)		0.08	49.7	10.9	12	0.13	21.5				0.29	94.6	76.1549	12.8256
ABG05-1	Sp	Abaga	Zhang et al. (2012)		0.05	44	23.8	14.2	0.18	17.6				0.21	100.04	68.8411	26.625
ABG06-1	Sp	Abaga	Zhang et al. (2012)		0.02	50.7	17.5	12.8	0.16	18.4				0.3	99.88	71.9292	18.8016
ABG07-1	Sp	Abaga	Zhang et al. (2012)		0.14	32	34.3	18	0.23	16.2				0.24	101.11	61.6019	41.8285
XLHT1	Sp	Abaga	Pan et al. (2013)	0.02	0.77	30.5	34.4	15.75	0.22	17.1	0.02	0.02	0.01		98.81	65.9324	43.0724
XLHT2a		Abaga	Pan et al. (2013)
XLHT2b		Abaga	Pan et al. (2013)
XLHT3		Abaga	Pan et al. (2013)
XLHT4	Sp	Abaga	Pan et al. (2013)	0.09	0.41	53.9	10.4	14.14	0.12	19.9	0.01	0.02	0		98.99	71.4993	11.4604
XLHT9	Sp	Abaga	Pan et al. (2013)	0.02	0.73	28.1	38.1	17.21	0.22	15.8	0	0.01	0		100.19	62.0711	47.6322
XLHT10		Abaga	Pan et al. (2013)
XLHT11	Sp	Abaga	Pan et al. (2013)	0.03	0.08	26	41.5	16.39	0.26	15.9	0	0.01	0		100.17	63.36	51.7086
XLHT12		Abaga	Pan et al. (2013)
XLHT13		Abaga	Pan et al. (2013)
XLHT14	Sp	Abaga	Pan et al. (2013)	0	0.09	52.5	15.7	11.38	0.15	19.6	0.01	0.03	0.01		99.47	75.4307	16.7092
XLHT15	Sp	Abaga	Pan et al. (2013)	0.05	0.21	31.2	36.2	15.13	0.2	17	0.03	0.05	0.01		100.08	66.6985	43.7679
XLHT17		Abaga	Pan et al. (2013)
XLHT18	Sp	Abaga	Pan et al. (2013)	0	0.05	51.4	14.9	12.25	0.16	19.3	0.01	0.05	0.01		98.13	73.7425	16.2805
XLHT19	Sp	Abaga	Pan et al. (2013)	0.05	0.05	48.7	18.1	11.91	0.14	19.6	0.01	0.01	0		98.57	74.5774	19.9568
XLHT20	Sp	Abaga	Pan et al. (2013)	0	0.07	56.4	10.4	11.44	0.11	20.3	0.01	0.03	0.01		98.77	75.9794	11.0083
XLHT22	Sp	Abaga	Pan et al. (2013)	0.01	0.06	51.6	14.5	12.5	0.13	19.4	0	0.01	0.01		98.22	73.4503	15.8611
southeastern NEC
BLS-1	Sp	Shuangliao	Yu et al. (2009)	0.05	0.12	57.77	9.64	10.9	0.13	20.96	0	0.02		0.46	100.05	77.4151	10.0672
BLS-2	Sp	Shuangliao	Yu et al. (2009)	0.04	0.15	27.53	41.65	14.05	0.27	16.46	0	0.02		0.19	100.36	67.6199	50.3699
BLS-3	Sp	Shuangliao	Yu et al. (2009)	10.18	0.13	42.2	7.9	10.91	0.13	27.88	0.05	0.01		0.43	99.82	81.9989	11.1572
BLS-5	Sp	Shuangliao	Yu et al. (2009)	0.07	0.2	57.83	9.36	10.74	0.12	20.62	0	0.02		0.43	99.39	77.3877	9.79431
BLS-6	Sp	Shuangliao	Yu et al. (2009)	0.03	0.11	36.13	32.55	13.27	0.23	17.3	0	0.01		0.23	99.86	69.9149	37.6701
NBS-1	Sp	Shuangliao	Yu et al. (2009)	0.03	0.1	57.62	10.32	10.27	0.13	20.88	0	0.02		0.44	99.81	78.3743	10.7262
BBT-1	Sp	Shuangliao	Yu et al. (2009)	0.11	0.13	44.86	22.05	13.19	0.18	19.27	0	0.03		0.38	100.2	72.2548	24.7971
BBT-2	Sp	Shuangliao	Yu et al. (2009)	0.02	0.09	37.9	31.12	11.32	0.18	17.71	0.01	0.03		0.22	98.6	73.6063	35.5184
BBT-4	Sp	Shuangliao	Yu et al. (2009)	0.05	0.05	35.9	33.88	12.21	0.23	17.33	0.01	0.04		0.22	99.92	71.6716	38.7664
BBT-5	Sp	Shuangliao	Yu et al. (2009)	0.04	0.09	35.05	35.35	11.7	0.22	17.68	0.01	0.02		0.18	100.34	72.9264	40.3548
BBT-6	Sp	Shuangliao	Yu et al. (2009)	0.09	0.15	35.61	31.51	13.32	0.23	17.7	0.01	0.03		0.24	98.89	70.315	37.249
BBT-7	Sp	Shuangliao	Yu et al. (2009)	0.13	0.16	41.7	25.93	13.11	0.19	18.36	0.02	0.04		0.35	99.99	71.3991	29.4354
BBT-8	Sp	Shuangliao	Yu et al. (2009)	0.1	0.28	54.29	11.97	12.16	0.13	20.56	0.01	0.01		0.39	99.9	75.0867	12.885
BBT-9	Sp	Shuangliao	Yu et al. (2009)	0.07	0.42	22.14	45.13	16.55	0.27	15.73	0	0.02		0.19	100.52	62.8837	57.7601
BBT-10	Sp	Shuangliao	Yu et al. (2009)	0.09	0.29	37.71	30.4	12.13	0.2	18.62	0.01	0.01		0.26	99.72	73.2354	35.0985
BBT-11	Sp	Shuangliao	Yu et al. (2009)	0.09	0.24	39.69	26.31	14.19	0.2	18.54	0.02	0.02		0.36	99.66	69.961	30.781
BBT1-5	Sp	Shuangliao	Hao et al. (2016)	0.07	0.17	39.93	28.73	12.71	0.16	18.65	0			0.13	100.55	72.3423	32.5543
BBT1-06	Sp	Shuangliao	Hao et al. (2016)	0.07	0.18	43.09	25.63	12.32	0.16	19.34	0.02			0.16	100.97	73.6722	28.5212
BBT2-4	Sp	Shuangliao	Hao et al. (2016)	0.08	0.21	39.76	28.34	12.27	0.17	18.89	0.01			0.09	99.82	73.2927	32.3482
BBT2-14	Sp	Shuangliao	Hao et al. (2016)	0.05	0.58	31.48	36.55	15.26	0.23	16.58	0.01			0.09	100.83	65.9487	43.7848
BL2-10	Sp	Shuangliao	Hao et al. (2016)	0.04	0.09	56.02	11.99	10.03	0.11	20.72	0.01			0.13	99.14	78.6434	12.5553
17SL1-1	Sp	Shuangliao	Guo et al. (2020)	0.04	0.12	53.08	13.54	10.32	0.11	21.67	0.01	0.04	0.03	0.34	99.3	78.9164	14.6175
17SL1-2	Sp	Shuangliao	Guo et al. (2020)	0.06	0.16	55.02	10.53	11.09	0.1	21.74	0	0.01	0	0.36	99.07	77.75	11.3827
17SL1-7	Sp	Shuangliao	Guo et al. (2020)	0.05	0.44	37.12	29.55	12.08	0.14	19.07		0.01		0.25	98.71	73.7809	34.8228
17SL1-8	Sp	Shuangliao	Guo et al. (2020)	0.02	0.13	30.46	36.66	13.97	0.23	17.58	0.01	0.02	0.01	0.14	99.23	69.1661	44.6828
17SL1-16	Sp	Shuangliao	Guo et al. (2020)			57.15	9.07	10.9	0.06	21.47		0.02		0.38	99.05	77.8326	9.62613
17SL1-18	Sp	Shuangliao	Guo et al. (2020)	0.04	0.02	55.53	10.8	10.24	0.1	21.16		0.06	0.02	0.34	98.31	78.6483	11.546
17SL1-20	Sp	Shuangliao	Guo et al. (2020)	0.03	0.37	36.91	30.62	12.8	0.17	18.09	0.02	0.05	0.01	0.17	99.24	71.5848	35.7646
17SL1-23	Sp	Shuangliao	Guo et al. (2020)	0.05	0.07	49.88	17.33	10.21	0.1	21.16	0.01	0.01	0	0.25	99.07	78.6976	18.9088
17SL2-3	Sp	Shuangliao	Guo et al. (2020)	0.05	0.01	56.4	10.83	9.89	0.08	21.98		0.01	0	0.34	99.59	79.8453	11.4162
17SL2-6	Sp	Shuangliao	Guo et al. (2020)		0.07	58.77	8.11	9.97	0.09	21.8	0.01	0.07	0	0.38	99.27	79.5821	8.47648
17SL2-7	Sp	Shuangliao	Guo et al. (2020)	0.03	0.08	58.59	9.03	10.01	0.13	21.88			0.01	0.39	100.15	79.5765	9.37419
17SL3-15	Sp	Shuangliao	Guo et al. (2020)	0.34	0.2	44.67	23.59	10.88	0.1	19.35	0.01	0	0		99.14	76.0207	26.1682
17SL3-16	Sp	Shuangliao	Guo et al. (2020)	0.05	0.58	25.43	41.53	14.3	0.17	17.52	0.01	0.06	0.01	0.18	99.84	68.5924	52.2914
l-14	Sp	Yitong	Xu et al. (1993)	0.03	0.13	56	12.3	10.57	0.11	20.42				0.31	99.87	77.4961	12.8422
l-44	Sp	Yitong	Xu et al. (1993)	0.05	0.17	56.52	12.82	9.23	0.14	20.57				0.3	99.8	79.8898	13.2066
2-07	Sp	Yitong	Xu et al. (1993)	0.02	0.09	56.42	10.55	10.8	0.14	20.2				0.41	98.63	76.9268	11.1459
2-32	Sp	Yitong	Xu et al. (1993)	0.05	0.12	52.4	14.91	10.58	0.17	19.97				0.31	98.51	77.0884	16.0286
3-07	Sp	Yitong	Xu et al. (1993)	0.03	0.23	29.7	38.21	15.75	0.21	16.05				0.19	100.37	64.495	46.3247
3-17	Sp	Yitong	Xu et al. (1993)	0.06	0.26	56.43	10.35	12.04	0.1	19.48				0.36	99.08	74.2538	10.956
l-48	Sp	Yitong	Xu et al. (1993)	0.05	0.38	45.7	18.84	19.86	0.23	14.35				0.28	99.69	56.2937	21.6642
l-17	Sp	Yitong	Xu et al. (1993)	0.07	0.17	61.05	2.47	17.66	0.12	17.19				0.26	98.99	63.4384	2.6424
2-12	Sp	Yitong	Xu et al. (1993)	0.02	0.05	56.38	11.69	10.77	0.09	20.02				0.36	99.38	76.8171	12.2109
2-31	Sp	Yitong	Xu et al. (1993)	0.01	0.05	55.47	11	11.3	0.15	19.7				0.34	98.02	75.6551	11.7411
2-51	Sp	Yitong	Xu et al. (1993)	0.01	0.1	52.75	14.58	11.81	0.05	19.41				0.3	99.01	74.5525	15.6416
DX91-7	Sp	Yitong	Xu et al. (1993)	0	0.09	55.64	11.06	12	0.12	19.81				0.38	99.1	74.6367	11.7658
DX-06	Sp	Yitong	Zhou et al. (2010)	0.05	0.1	52.51	14.31	9.98	0.13	19.9	0.01	0.02	0	0.31	97.32	78.0432	15.456
DX-07	Sp	Yitong	Zhou et al. (2010)	0.04	0.11	50.59	17.12	10.04	0.13	20.04	0.03	0.03	0.02	0.32	98.47	78.0606	18.5015
DX-08	Sp	Yitong	Zhou et al. (2010)	0.07	0.09	54.47	12.14	10.42	0.14	20.31	0	0.01	0	0.36	98.01	77.6508	13.0066
DX-10	Sp	Yitong	Zhou et al. (2010)	0.05	0.13	51.37	16.06	10.82	0.14	19.66	0.01	0	0	0.33	98.57	76.409	17.3367
DX-11	Sp	Yitong	Zhou et al. (2010)	0	0.07	51.36	16.72	10.26	0.14	20.03	0	0.02	0.02	0.31	98.93	77.6784	17.9243
08DX-01	Sp	Yitong	Zhou et al. (2010)	0.02	0.14	53.95	13.16	10.87	0.13	20.06	0.01	0.02	0	0.34	98.7	76.6878	14.0626
08DX-02	Sp	Yitong	Zhou et al. (2010)	0.03	0.13	48.59	18.93	11.59	0.15	19.6	0	0.02	0	0.28	99.32	75.0903	20.7198
08DX-04	Sp	Yitong	Zhou et al. (2010)	0.02	0.09	56	11.74	10.77	0.12	20.51	0.01	0.01	0.01	0.38	99.66	77.245	12.3296
08DX-06	Sp	Yitong	Zhou et al. (2010)	0.03	0.09	53.34	13.66	11.26	0.12	19.79	0.01	0.03	0	0.33	98.66	75.8041	14.661
08DX-08	Sp	Yitong	Zhou et al. (2010)	0.05	0.13	55.25	12.57	11.13	0.14	20.5	0.01	0.01	0.01	0.36	100.16	76.6531	13.2414
08DX-10	Sp	Yitong	Zhou et al. (2010)	0.05	0.16	57.68	9.83	11.84	0.13	20.04	0.01	0.01	0.01	0.34	100.1	75.1064	10.2597
08DX-11	Sp	Yitong	Zhou et al. (2010)	0.04	0.09	53.84	12.67	11.27	0.12	19.97	0.01	0	0.01	0.38	98.4	75.9535	13.6342
08DX-12	Sp	Yitong	Zhou et al. (2010)	0.04	0.11	54.91	10.96	10.99	0.12	19.95	0.01	0.02	0	0.37	97.48	76.392	11.8087
08DX-13	Sp	Yitong	Zhou et al. (2010)	0.02	0.08	55.94	10.32	11.01	0.13	20	0	0.01	0.01	0.38	97.9	76.4043	11.0129
08DX-14	Sp	Yitong	Zhou et al. (2010)	0.02	0.22	56.26	9.99	12.38	0.11	19.67	0.02	0.01	0	0.43	99.11	73.9054	10.644
08DX-15	Sp	Yitong	Zhou et al. (2010)	0.02	0.16	48.5	18.92	12.46	0.15	18.47	0	0.01	0.01	0.3	99	72.5452	20.7416
DX-03	Sp	Yitong	Zhou et al. (2010)	0.02	0.26	53.48	13.05	13	0.13	19.37	0	0.01	0	0.27	99.59	72.6477	14.0669
DX-09	Sp	Yitong	Zhou et al. (2010)	0.04	0.13	55.22	12.13	10.11	0.12	20.44	0	0	0	0.38	98.57	78.2793	12.8435
08DX-05	Sp	Yitong	Zhou et al. (2010)	0.06	0.08	54.53	12.63	11.04	0.13	20.28	0.01	0.02	0.01	0.35	99.14	76.6053	13.4481
08DX-07	Sp	Yitong	Zhou et al. (2010)	0.02	0.11	56.64	10.01	10.89	0.09	20.47	0.01	0.01	0.01	0.37	98.63	77.0151	10.5991
08DX-17	Sp	Yitong	Zhou et al. (2010)	0.03	0.05	48.11	19.65	11.9	0.14	19.52	0.02	0.02	0	0.29	99.73	74.5157	21.5068
08DX-18	Sp	Yitong	Zhou et al. (2010)	0.05	0.14	49.2	18.39	11.9	0.12	19.02	0.02	0	0.01	0.31	99.16	74.0198	20.0477
DX-04	Sp	Yitong	Zhou et al. (2010)	0	0.03	54.01	13.12	12.57	0.13	19.16	0.01	0.01	0	0.35	99.39	73.0972	14.0124
DX-05	Sp	Yitong	Zhou et al. (2010)	0.01	0.08	54.32	11.28	11.86	0.11	19.46	0	0.01	0.01	0.31	97.45	74.5212	12.2272
08DX-03	Sp	Yitong	Zhou et al. (2010)	0.04	0.42	51.26	13.04	16.68	0.14	18.3	0.13	0.01	0	0.3	100.32	66.1668	14.5777
08DX-09	Sp	Yitong	Zhou et al. (2010)	0.04	0.04	37.56	30.55	13.82	0.19	16.97	0.01	0.03	0	0.21	99.42	68.6407	35.3017
DX-01	Sp	Yitong	Zhou et al. (2010)	0	0.18	32.08	37.38	13.5	0.22	16.88	0.01	0.02	0.01	0.18	100.46	69.0292	43.8728
DX-02	Sp	Yitong	Zhou et al. (2010)	0	0.1	34.68	31.85	16.4	0.22	16.28	0.01	0.02	0	0.2	99.76	63.8925	38.1225
08DX-20		Yitong	Zhou et al. (2010)
08DX-16	Sp	Yitong	Zhou et al. (2010)	0.27	1.15	39.72	20.66	19.2	0.19	17.2	0.13	0.02	0.01	0.32	98.87	61.4921	25.8672
08DX-19	Sp	Yitong	Zhou et al. (2010)	0.11	0.83	41.16	20.77	18.14	0.16	17.23	0.07	0.03	0.02	0.3	98.82	62.8685	25.2904
YT-5	Sp	Yitong	Hao et al. (2016)	0.08	0.12	48.64	20.11	11.11	0.13	20.04	0			0.11	100.34	76.2771	21.7132
YT-25	Sp	Yitong	Hao et al. (2016)	0.03	0.4	39.86	29.31	12.98	0.18	17.75	0			0.05	100.56	70.9101	33.0334
YT-26	Sp	Yitong	Hao et al. (2016)	0.03	0.15	32.95	36.46	14.21	0.21	16.5	0.01			0.08	100.6	67.4248	42.6046
DSH00-2	Sp	Jiaohe	Zhou et al. (2007)	0.08	0.13	57.28	9.56	10.72	0.08	20.34	0.01	0.02	0	0.41	98.63	77.1804	10.0689
DSH00-3	Sp	Jiaohe	Zhou et al. (2007)	0.1	0.14	58.2	9.05	10.36	0.1	20.55	0.02	0.01	0.02	0.37	98.92	77.9534	9.44605
DSH00-4	Sp	Jiaohe	Zhou et al. (2007)	0.05	0.06	53.91	13.44	11.7	0.11	19.61	0.03	0.03	0.01	0.36	99.31	74.9228	14.328
DSH00-5	Sp	Jiaohe	Zhou et al. (2007)	0.04	0.1	54.68	13.51	10.49	0.15	19.81	0.04	0.04	0.01	0.32	99.19	77.0973	14.2181
DSH00-6	Sp	Jiaohe	Zhou et al. (2007)	0.05	0.1	58.45	9.59	10.05	0.11	20.64	0.02	0.01	0	0.35	99.37	78.5448	9.91523
DSH00-7	Sp	Jiaohe	Zhou et al. (2007)	0.07	0.11	58.15	9.98	11.01	0.09	20.27	0.01	0	0	0.39	100.08	76.6452	10.3246
DSH00-8	Sp	Jiaohe	Zhou et al. (2007)	0.09	0.09	54.86	13.8	10.66	0.12	19.82	0.02	0.06	0.02	0.3	99.84	76.8211	14.4384
DSH00-10	Sp	Jiaohe	Zhou et al. (2007)	0.03	0.1	49.43	20.34	10.64	0.14	19.43	0	0.03	0	0.26	100.4	76.4992	21.6328
DSH00-11	Sp	Jiaohe	Zhou et al. (2007)	0.04	0.08	49.63	17.69	12.18	0.14	19.03	0	0.01	0	0.28	99.08	73.5803	19.297
DSH00-12	Sp	Jiaohe	Zhou et al. (2007)	0.09	0.09	58.21	10.31	10.1	0.13	20.62	0.02	0	0	0.38	99.95	78.4447	10.6199
YQS-1	Sp	Jiaohe	Yu et al. (2009)	0.07	0.03	52.09	15.23	12.57	0.15	19.33	0.01	0.01		0.42	99.91	73.2705	16.3976
YQS-2	Sp	Jiaohe	Yu et al. (2009)	0.03	0.06	25.65	43.59	16.36	0.31	14.53	0	0		0.17	100.7	61.2877	53.2717
YQS-3	Sp	Jiaohe	Yu et al. (2009)	0.02	0.04	50.18	18.09	12.58	0.16	18.96	0.01	0		0.34	100.38	72.8746	19.4742
YQS-4	Sp	Jiaohe	Yu et al. (2009)	0.02	0.05	43.56	25.37	12.66	0.19	18.05	0	0.01		0.29	100.2	71.7632	28.0941
YQS-5	Sp	Jiaohe	Yu et al. (2009)	0.03	0.06	46.07	21.09	14.5	0.17	18.02	0.01	0.02		0.31	100.28	68.8985	23.4946
YQS-6	Sp	Jiaohe	Yu et al. (2009)	0.02	0.05	47.71	21.15	11.81	0.19	19.28	0.01	0		0.29	100.51	74.4248	22.9219
YQS-7	Sp	Jiaohe	Yu et al. (2009)	0.03	0.06	55.64	12.3	11.16	0.12	19.98	0.02	0.03		0.37	99.71	76.1413	12.9146
YQS-8	Sp	Jiaohe	Yu et al. (2009)	0.03	0.09	39.31	29.68	13.81	0.22	17.51	0	0.01		0.27	100.93	69.3264	33.6209
YQS-9	Sp	Jiaohe	Yu et al. (2009)	0.02	0.12	58.03	9.86	10.56	0.11	20.63	0	0.02		0.44	99.79	77.6905	10.2321
YQS-10	Sp	Jiaohe	Yu et al. (2009)	0.01	0.15	37.81	31.18	13.53	0.21	17.09	0.03	0.02		0.64	100.67	69.2457	35.617
YQS-11	Sp	Jiaohe	Yu et al. (2009)	0.02	0.08	41.45	28.32	11.83	0.17	18.36	0	0.02		0.83	101.08	73.4501	31.4288
YQS-12	Sp	Jiaohe	Yu et al. (2009)	0.05	0.12	42.86	25.75	12.4	0.17	18.76	0	0.03		0.31	100.45	72.9498	28.7259
YQS-14	Sp	Jiaohe	Yu et al. (2009)	0.03	0.09	36.74	32.79	12.92	0.24	17.51	0	0.01		0.25	100.58	70.7245	37.4497
YQS-15	Sp	Jiaohe	Yu et al. (2009)	0.03	0.17	34.8	33.57	14.2	0.23	16.8	0.01	0.03		0.23	100.07	67.8346	39.2882
YQS-16	Sp	Jiaohe	Yu et al. (2009)	0.04	0.11	43.17	25.91	11.97	0.19	18.62	0	0.01		0.33	100.35	73.4949	28.7052
DSH009	Sp	Jiaohe	Hao et al. (2016)	0.04	0.07	58.31	8.51	10.18	0.09	20.28					97.48	78.0273	8.91742
DSH0012	Sp	Jiaohe	Hao et al. (2016)	0.05	0.09	56.47	10.16	9.71	0.09	20.36					96.93	78.8926	10.7697
DSH0014	Sp	Jiaohe	Hao et al. (2016)	0.03	0.1	55.47	11.01	10.07	0.1	20.08					96.86	78.0436	11.7506
DSH0017	Sp	Jiaohe	Hao et al. (2016)	0.07	0.21	38.42	27.79	12.57	0.15	16.95					96.16	70.62	32.6704
17JH4	Sp	Jiaohe	Guo et al. (2020)	0.05	0.2	58.03	8.26	10	0.11	22.31		0.01	0.01	0.28	99.26	79.9071	8.72008
17JH5	Sp	Jiaohe	Guo et al. (2020)	0.03	0.19	38.81	30.21	11.21	0.13	18.98	0.01	0.05	0	0.23	99.85	75.1126	34.3154
17JH14	Sp	Jiaohe	Guo et al. (2020)	0.01	0.45	23.1	45.92	13.88	0.18	16.63		0.09	0.02	0.14	100.42	68.1094	57.158
17JH18	Sp	Jiaohe	Guo et al. (2020)	0.02	0.09	53.38	13.39	10.24	0.08	21.43	0	0.08	0.01	0.4	99.12	78.8605	14.4094
17JH21	Sp	Jiaohe	Guo et al. (2020)	0.07	0.1	51.84	15.78	9.79	0.15	21.35	0.01	0.03		0.26	99.38	79.5392	16.9639
17JH24	Sp	Jiaohe	Guo et al. (2020)	0.07	0.16	45.13	22.45	10.62	0.12	20.83		0.06	0.01	0.22	99.67	77.7594	25.0298
WQ91-1	Sp	Wangqing	Xu et al. (1998)		0.06	58.53	10.49	9.97	0.09	21.07				0.36	100.57	79.0231	10.7327
WQ91-37	Sp	Wangqing	Xu et al. (1998)		0.19	57.72	9.31	9.94	0.05	21.27				0.39	98.87	79.2289	9.76386
WQ91-6	Sp	Wangqing	Xu et al. (1998)		0.04	58.89	7.92	9.95	0.11	20.64				0.41	97.96	78.7129	8.27536
WQ91-11	Sp	Wangqing	Xu et al. (1998)		0.05	54.09	16.39	10.45	0.11	20.68				0.34	102.11	77.9131	16.8933
WQ91-77	Sp	Wangqing	Xu et al. (1998)		0.14	47.94	20.3	10.21	0.11	18.85				0.32	97.87	76.6954	22.1222
WQ91-5	Sp	Wangqing	Xu et al. (1998)		0.05	25.41	41.79	14.6	0.16	15.73				0.23	97.97	65.7595	52.4552
WQ91-13	Sp	Wangqing	Xu et al. (1998)		0.1	31.48	40.07	13.04	0.17	15.62				0.16	100.64	68.1045	46.0594
WQ91-20	Sp	Wangqing	Xu et al. (1998)		0.07	49.74	18.96	10.22	0.1	18.97				0.34	98.4	76.7912	20.3639
WQ91-21	Sp	Wangqing	Xu et al. (1998)		0.04	49.88	17.84	10.92	0.09	19.27				0.36	98.4	75.878	19.3503
WQ91-22	Sp	Wangqing	Xu et al. (1998)		0.63	33.71	35.95	14.27	0.12	16.69				0.2	101.57	67.5835	41.705
WQ5		Wangqing	Song et al. (2013)
WQ9	Sp	Wangqing	Song et al. (2013)	0.07	0.03	48.21	20.74	10.68	0.1	19.8	0.01			0.31	99.95	76.7698	22.3961
WQ10	Sp	Wangqing	Song et al. (2013)	0.07	0.05	55.2	12.51	11.21	0.11	20.3	<0.01			0.37	99.82	76.3481	13.1969
WQ13	Sp	Wangqing	Song et al. (2013)	0.05	0.05	54.93	12.47	10.81	0.11	20.79	<0.01			0.4	99.61	77.4177	13.2164
WQ15		Wangqing	Song et al. (2013)
WQ16	Sp	Wangqing	Song et al. (2013)	0.04	0.09	58.2	9.43	11.29	0.11	21.41	<0.01			0.39	100.96	77.1709	9.8038
PFS5	Sp	Wangqing	Wang et al. (2013)	0.03	0.03	55.01	12.13	12.47	0.14	19.4				0.38	99.59	73.4971	12.8862
PFS10	Sp	Wangqing	Wang et al. (2013)	0.07	0.05	55.2	12.51	11.21	0.11	20.3				0.37	99.82	76.3481	13.1969
PFS13	Sp	Wangqing	Wang et al. (2013)	0.05	0.05	54.93	12.47	10.81	0.11	20.79				0.4	99.61	77.4177	13.2164
PFS15	Sp	Wangqing	Wang et al. (2013)	0.05	0.07	56.96	11.49	9.65	0.1	20.95				0.4	99.67	79.4657	11.9192
PFS16	Sp	Wangqing	Wang et al. (2013)	0.04	0.09	58.2	9.43	9.56	0.11	21.41				0.39	99.23	79.9683	9.8038
WQ39	Sp	Wangqing	Hao et al. (2016)	0.05	0.05	37.52	29.97	13.11	0.16	16.22					97.08	68.8028	34.8894
WQ62	Sp	Wangqing	Hao et al. (2016)	0.14	0.15	54.65	12.21	9.16	0.07	20.67					97.05	80.0893	13.0344
WQ72	Sp	Wangqing	Hao et al. (2016)	0.01	0.04	58.04	9.27	10.1	0.1	20.12					97.68	78.0267	9.67755
WQ-004	Sp	Wangqing	Hao et al. (2016)	0.01	0.07	58.44	9.41	11	0.11	21.25	0.02			0.18	100.49	77.4956	9.74877
WQ-005	Sp	Wangqing	Hao et al. (2016)	0.03	0.19	57.39	10.56	11.02	0.12	20.85	0			0.16	100.32	77.1304	10.9874
WQ-006	Sp	Wangqing	Hao et al. (2016)	0.01	0.02	58.73	10.2	10.31	0.11	21.28	0.01			0.16	100.83	78.6289	10.4351
WQ-101	Sp	Wangqing	Hao et al. (2016)	0.02	0	58.58	9.78	10.07	0.12	21.4	0			0.18	100.15	79.1151	10.0717
northeastern NCC
CBH1	Sp	Changbaishan	Liu (2014)	0.04	0.14	57.23	9.7	11.06	0.07	20.51				0.41	99.16	76.7745	10.2135
CBH2	Sp	Changbaishan	Liu (2014)	0.05	0.12	58.32	9.19	11.05	0.1	20.41	0.01		0.02	0.4	99.67	76.7034	9.56435
CBH3	Sp	Changbaishan	Liu (2014)	0.1	0.16	55.44	12.37	10.52	0.1	20.35				0.38	99.42	77.5189	13.0245
CBH4	Sp	Changbaishan	Liu (2014)	0.09	0.2	58.18	8.05	11.28	0.08	20.96		0.01	0.01	0.42	99.28	76.8103	8.49717
CBH5	Sp	Changbaishan	Liu (2014)	0.08	0.17	46.69	21.25	12.14	0.14	18.93		0.02		0.32	99.74	73.5418	23.3986
CBH6	Sp	Changbaishan	Liu (2014)	0.2	0.13	50.02	16.79	11.88	0.16	19.75	0.01	0.03	0.01	0.35	99.33	74.7693	18.3861
CBH7	Sp	Changbaishan	Liu (2014)	0.53	0.14	53.85	13.34	11.17	0.11	20.23	0.01	0.01	0.05	0.37	99.81	76.3503	14.2558
CBH8	Sp	Changbaishan	Liu (2014)	0.04	0.13	57.41	10.43	10.47	0.1	20.69		0.03	0.02	0.41	99.73	77.8885	10.868
BDX-01	Sp	Changbaishan	Par et al. (2017)	0.032	0.1075	55.744	12.138	10.8395	0.113	20.5025	0.01	0.044	0.011	0.360333	99.9128	77.1252	12.7506
BDX-02	Sp	Changbaishan	Par et al. (2017)	0.027	0.052	59.377	8.6825	11.3355	0.12175	20.1675	0.0035	0	0.0183333	0.374	100.165	76.0273	8.93689
BDX-03	Sp	Changbaishan	Par et al. (2017)	0.037	0.044	59.1397	8.521	11.5397	0.114333	20.018	0.016	0	0	0.439333	99.9147	75.5634	8.81741
BDX-04	Sp	Changbaishan	Par et al. (2017)	0.01675	0.0446667	59.3315	8.65625	11.4285	0.1395	20.2018	0.0035	0.0536667	0.02	0.387	100.298	75.9092	8.91851
BDX-05	Sp	Changbaishan	Par et al. (2017)	0.037	0.0493333	53.1767	13.1923	13.3143	0.136333	18.9023	0.0075	0.024	0.007	0.364333	99.2282	71.6769	14.2736
BDX-06	Sp	Changbaishan	Par et al. (2017)	0.03	0.0236667	55.6363	12.114	10.899	0.0973333	20.2803	0.021	0.0145	0.002	0.349	99.5182	76.8352	12.75
BDX-07	Sp	Changbaishan	Par et al. (2017)	0.0145	0.044	57.3633	10.4117	11.5233	0.0956667	20.059	0.014	0.046	0.0125	0.355333	99.9818	75.6272	10.8588
BDX-08	Sp	Changbaishan	Par et al. (2017)	0.023	0.0416667	53.313	13.4037	13.6143	0.152	19.08	0.00933333	0.009	0.005	0.386667	100.063	71.4137	14.4375
BDX-09	Sp	Changbaishan	Par et al. (2017)	0.019	0.046	54.132	13.226	12.299	0.165333	19.6047	0.008	0.021	0.009	0.321	99.882	73.9678	14.0879
BDX-13	Sp	Changbaishan	Par et al. (2017)	0.0105	0.0935	55.728	12.7303	10.7907	0.133	20.2173	0.018	0.0245	0.031	0.368333	100.145	76.9574	13.2934
BDX-14-1	Sp	Changbaishan	Par et al. (2017)	0.0413333	0.0856667	53.1667	14.564	11.8707	0.127667	20.1403	0.00966667	0.05	0.01	0.356667	100.459	75.1513	15.5297
BDX-14-2	Sp	Changbaishan	Par et al. (2017)	0.041	0.071	24.821	44.6557	15.411	0.239333	15.4893	0.05	0.011	0.0165	0.103667	100.909	64.1784	54.6992
BDX-15-1	Sp	Changbaishan	Par et al. (2017)	0.0455	0.0995	29.8965	38.882	14.623	0.231	16.3405	0.023	0.068	0.046	0.169	100.445	66.5766	46.6058
BDX-15-2	Sp	Changbaishan	Par et al. (2017)	0.048	0.0763333	52.3983	15.5677	11.9343	0.137	19.3463	0.0035	0	0.0175	0.333333	99.8848	74.2906	16.6249
BDX-16-1	Sp	Changbaishan	Par et al. (2017)	0.045	0.1532	57.5184	9.55	11.7252	0.1214	20.3704	0.018	0.0216667	0.026	0.4108	99.9651	75.5911	10.0261
BDX-16-2	Sp	Changbaishan	Par et al. (2017)	0.0025	0.0266667	57.9297	9.299	12.0707	0.123	19.8587	0.0295	0.031	0.021	0.367667	99.7813	74.5719	9.72562
CBS01	Sp	Changbaishan	Xu et al. (2019)	0.072	0.066	49.517	11.099	8.336	0.098	18.655	0.005	0.016	0.005	0.241	88.11	79.9565	13.0763
CBS02	Sp	Changbaishan	Xu et al. (2019)	0.054	0.034	52.487	13.358	11.293	0.102	19.484	0	0.062	0.014	0.332	97.22	75.4629	14.5889
CBS03	Sp	Changbaishan	Xu et al. (2019)	0.09	0.045	54.003	14.166	10.853	0.132	20.752	0.019	0	0.004	0.338	100.402	77.3161	14.9699
CBS04	Sp	Changbaishan	Xu et al. (2019)	0.051	0.088	55.141	13.839	11.51	0.13	20.591	0	0.002	0	0.346	101.698	76.1275	14.4159
CBS05	Sp	Changbaishan	Xu et al. (2019)	0.025	0.041	54.603	13.777	11.508	0.117	20.473	0.015	0.006	0.01	0.344	100.919	76.0261	14.4816
CBS06	Sp	Changbaishan	Xu et al. (2019)	0.113	0.002	57.251	10.449	11.953	0.134	20.629	0.011	0.018	0.009	0.359	100.928	75.4686	10.9125
CBS07	Sp	Changbaishan	Xu et al. (2019)	0.032	0.038	56.684	10.673	12.174	0.148	20.046	0.008	0.018	0.012	0.359	100.192	74.5883	11.2192
CBS08	Sp	Changbaishan	Xu et al. (2019)	0.075	0.043	57.149	10.133	12.015	0.13	20.075	0.01	0.07	0.081	0.338	100.119	74.8639	10.6345
CBS09	Sp	Changbaishan	Xu et al. (2019)	0.086	0	57.482	10.722	12.223	0.122	20.461	0.007	0.019	0	0.415	101.537	74.8993	11.1259
CBS10	Sp	Changbaishan	Xu et al. (2019)	0.094	0.01	55.787	10.457	11.95	0.089	19.664	0.01	0.025	0.013	0.353	98.452	74.5756	11.1745
CBS11	Sp	Changbaishan	Xu et al. (2019)	0.0492	0.0076	58.0924	8.315	10.939	0.1204	20.412	0.012	0.0112	0.0024	0.3862	98.3474	76.8851	8.76445
CBS12	Sp	Changbaishan	Xu et al. (2019)	0.049	0.086	51.6444	13.1948	10.8114	0.113	19.836	0.0062	0.011	0.0086	0.2844	96.0448	76.5836	14.6374
TC01	Sp	Changbaishan	Xu et al. (2020)	0.03	0.03	52.08	15.15	11.63	0.12	19.68	0	0.01	0	0.01	98.74	75.102	16.3282
TC02	Sp	Changbaishan	Xu et al. (2020)	0.02	0.02	56.02	10.78	12.14	0.12	19.63	0	0.01	0	0	98.74	74.2423	11.4331
TC03	Sp	Changbaishan	Xu et al. (2020)	0.02	0.09	52.82	14.3	11.93	0.12	19.93	0	0	0	0	99.21	74.8611	15.3702
TC04	Sp	Changbaishan	Xu et al. (2020)	0.08	0.16	38.7	28.66	13.1	0.16	17.81	0	0	0	0	98.67	70.7897	33.1909
TC05	Sp	Changbaishan	Xu et al. (2020)	0	0.01	58.39	8.53	12.25	0.12	19.86	0	0.01	0	0	99.17	74.2925	8.92536
TC06	Sp	Changbaishan	Xu et al. (2020)	0.01	0.02	58.26	8.64	12.17	0.11	20.03	0	0.01	0	0	99.25	74.5794	9.04839
TC07	Sp	Changbaishan	Xu et al. (2020)	0	0.01	58.32	8.73	11.99	0.1	20.1	0	0.01	0	0	99.26	74.9264	9.12549
TC08	Sp	Changbaishan	Xu et al. (2020)	0.02	0.09	52.81	14.04	11.75	0.12	19.81	0	0.01	0.01	0	98.66	75.0331	15.1354
SJXO-1	Sp	Huinan	Xu et al. (2003)	0.05	0.11	55.12	9.65	12.37	0.04	22.15	0.01	0.03	0		99.53	76.1443	10.5102
SJXO-2	Sp	Huinan	Xu et al. (2003)	0.1	0.5	49.89	16.8	11.54	0.24	20.68	0.01	0	0		99.76	76.1586	18.4272
SJXO-3	Sp	Huinan	Xu et al. (2003)	0.04	0.12	47.76	18.97	11.97	0.2	19.97	0	0	0.01		99.04	74.8358	21.0393
SJXO-4	Sp	Huinan	Xu et al. (2003)	0.04	0.04	57.35	10.06	10.68	0.11	20.38	0.02	0.01	0		98.69	77.2807	10.5285
SJXO-6	Sp	Huinan	Xu et al. (2003)	0.06	0.71	47.57	13.86	16.73	0.08	20.14	0.02	0	0		99.17	68.2124	16.3499
SJXO-8	Sp	Huinan	Xu et al. (2003)	0.05	0.01	49.21	17.83	12.62	0.12	20.75	0.01	0	0		100.6	74.5605	19.5534
DLW-9	Sp	Huinan	Xu et al. (2003)	0	0.08	58.2	10.65	10.91	0	21.41	0	0	0		101.25	77.7685	10.9335
DYS-12	Sp	Huinan	Xu et al. (2003)	0.03	0.03	57.01	10.69	10.95	0.21	21.79	0	0.03	0.01		100.75	78.0084	11.1734
DYS-5	Sp	Huinan	Xu et al. (2003)	0	0.05	55.92	8.97	12.28	0.12	22.33	0.01	0	0		99.68	76.4229	9.71531
DYS-9	Sp	Huinan	Xu et al. (2003)	0.03	0.18	47.95	18.5	14.14	0.33	18.5	0.03	0.07	0.02		99.75	69.9897	20.5606
DLW-3	Sp	Huinan	Xu et al. (2003)	0.09	0.14	39.43	26.45	14.02	0.23	19.27	0	0	0		99.63	71.015	31.0347
DLW-4	Sp	Huinan	Xu et al. (2003)	0.04	0.37	41.68	25.83	12.05	0.23	20.32	0	0	0		100.52	75.037	29.3652
DLW-5	Sp	Huinan	Xu et al. (2003)	0.02	0.31	37.68	29.38	12.29	0.22	20.12	0	0	0		100.02	74.4782	34.3431
DLW-6	Sp	Huinan	Xu et al. (2003)	0	0.44	32.5	33.46	15.43	0.28	17.27	0	0	0		99.38	66.6123	40.8513
DLW-7	Sp	Huinan	Xu et al. (2003)	0	0.13	46.05	22.89	12.11	0.19	20.32	0	0	0		101.69	74.9439	25.0067
DLW-8	Sp	Huinan	Xu et al. (2003)	0	0.14	29.17	39.38	15.3	0.35	16.07	0	0.01	0		100.42	65.1842	47.5243
DYS-1	Sp	Huinan	Xu et al. (2003)	0.04	0.28	35.14	31.47	13.95	0.24	18.12	0.02	0.05	0		99.31	69.8377	37.5303
DYS-2	Sp	Huinan	Xu et al. (2003)	0.04	0.54	36.51	29.65	14.05	0.31	19.19	0	0	0		100.29	70.8852	35.2663
DYS-3	Sp	Huinan	Xu et al. (2003)	0.02	0.44	33.49	33.48	13.78	0.09	18.41	0.01	0	0		99.72	70.4271	40.1426
DYS-4	Sp	Huinan	Xu et al. (2003)	0.06	0.23	49.55	20.77	12.34	0.24	17.94	0	0.02	0		101.15	72.1564	21.948
DYS-6	Sp	Huinan	Xu et al. (2003)	0.07	0.24	32.89	37.51	13.15	0.28	17.09	0	0	0		101.23	69.849	43.345
DYS-7	Sp	Huinan	Xu et al. (2003)	0.07	0.65	34.18	32.19	13.68	0.24	19.01	0	0	0		100.02	71.2402	38.7173
DYS-8	Sp	Huinan	Xu et al. (2003)	0.06	0.29	33.65	36.22	13.56	0.25	17.45	0	0	0		101.48	69.641	41.9304
DYS-21	Sp	Huinan	Xu et al. (2003)	0.04	0.3	34.84	33.04	12.95	0.39	18.63	0	0	0		100.19	71.9448	38.882
06JY02	Sp	Huinan	Tang et al. (2012)	0.04	0.11	52.7	12.2	11	0.11	20.3	0.01	0.03	0.02	0.32	96.84	76.6879	13.4476
06JY06	Sp	Huinan	Tang et al. (2012)	0.01	0.24	44.8	19.7	13.3	0.15	18.7	0	0	0.01	0.26	97.17	71.4799	22.7874
06JY30	Sp	Huinan	Tang et al. (2012)	0.03	0.3	53.9	10	11.8	0.12	20.7	0	0.01	0.01	0.3	97.17	75.7694	11.0729
06JY31	Sp	Huinan	Tang et al. (2012)	0.04	0.27	40.9	24.8	13.5	0.17	18.5	0.02	0.01	0	0.26	98.47	70.9535	28.9245
06JY34	Sp	Huinan	Tang et al. (2012)	0.01	0.27	37.3	29.2	12	0.17	18.2	0.03	0.04	0.01	0.18	97.41	72.9988	34.4435
DLW1	Sp	Huinan	Wang et al. (2013)	0.14	0.73	36.79	30.19	13.12	0.21	18.18				0.34	99.7	71.1818	35.5043
DLW3	Sp	Huinan	Wang et al. (2013)	0.09	0.11	57.09	9.45	11.06	0.14	20.97				0.38	99.29	77.1677	9.99444
DLW5	Sp	Huinan	Wang et al. (2013)	0.14	0.17	53.49	13.21	11.83	0.11	20.18				0.43	99.56	75.252	14.2125
DLW6	Sp	Huinan	Wang et al. (2013)	0.07	0.2	41.39	26.53	12.29	0.17	18.93				0.33	99.91	73.3022	30.0695
DLW8	Sp	Huinan	Wang et al. (2013)	0.05	0.07	56.69	10.3	10.97	0.12	20.92				0.43	99.55	77.2694	10.8643
DYS1	Sp	Huinan	Wang et al. (2013)	0.07	0.36	40.51	27.19	12.52	0.18	18.72				0.32	99.87	72.717	31.0469
DYS4	Sp	Huinan	Wang et al. (2013)	0.11	0.32	56.18	9.54	12.29	0.09	20.57				0.43	99.53	74.8964	10.2266
DYS5	Sp	Huinan	Wang et al. (2013)	0.1	0.37	39.82	27.51	12.55	0.14	18.82				0.29	99.6	72.7752	31.6685
DYS7	Sp	Huinan	Wang et al. (2013)	0.1	0.37	39.27	27.87	12.71	0.15	18.82				0.31	99.6	72.5235	32.2537
DYS9	Sp	Huinan	Wang et al. (2013)	0.07	0.1	57.52	9.86	11.1	0.12	20.61				0.42	99.8	76.7969	10.3134
DYS12	Sp	Huinan	Wang et al. (2013)	0.07	0.32	39.22	28.64	13.37	0.2	17.77				0.33	99.92	70.3192	32.8802
DYS13	Sp	Huinan	Wang et al. (2013)	0.1	0.36	40.72	27.33	12.35	0.17	18.56				0.31	99.9	72.8178	31.0462
DYS14	Sp	Huinan	Wang et al. (2013)	0.07	0.22	41.23	26.52	12.75	0.13	18.42				0.3	99.64	72.03	30.1431
LQL1	Sp	Huinan	Wang et al. (2013)	0.13	0.19	42.92	24.07	12.8	0.18	18.49				0.31	99.09	72.0276	27.3368
LQL3	Sp	Huinan	Wang et al. (2013)	0.09	0.1	53.69	13.99	11.3	0.1	19.64				0.35	99.26	75.5989	14.8791
LQL4	Sp	Huinan	Wang et al. (2013)	0.11	0.17	49.91	16.8	12.36	0.14	19.99				0.35	99.83	74.2464	18.4211
LQL6	Sp	Huinan	Wang et al. (2013)	0.06	0.1	55.62	12.1	10.53	0.08	20.32				0.36	99.17	77.4766	12.7353
LQL7	Sp	Huinan	Wang et al. (2013)	0.04	0.28	47	19.39	14.19	0.13	18.63				0.33	99.99	70.0626	21.6765
LQL8	Sp	Huinan	Wang et al. (2013)	0.16	0.21	55.65	10.02	12.36	0.11	21.02				0.39	99.92	75.1953	10.777
HLW1	Sp	Huinan	Liu (2014)	0.15	0.71	35.17	30.87	13.38	0.14	18.45	0.01		0.01	0.33	99.22	71.0816	37.0709
HLW2	Sp	Huinan	Liu (2014)	0.12	0.49	36.3	30.58	12.84	0.16	18.44			0.02	0.29	99.24	71.91	36.1182
HLW3	Sp	Huinan	Liu (2014)	0.11	0.16	57.23	9.35	11	0.07	20.9	0.02			0.47	99.31	77.2046	9.88143
HLW4	Sp	Huinan	Liu (2014)	0.1	0.17	53.09	13.43	11.91	0.1	20.4		0.01		0.38	99.59	75.3284	14.5137
HLW5	Sp	Huinan	Liu (2014)	0.05	0.06	57.54	9.68	10.71	0.08	21.11		0.02		0.44	99.69	77.8443	10.1453
HYZ1	Sp	Huinan	Liu (2014)	0.09	0.39	41.9	25.81	12.17	0.14	19.14	0.01			0.3	99.95	73.7081	29.2496
HYZ2	Sp	Huinan	Liu (2014)	0.12	0.33	56.39	9.3	12.36	0.08	20.57		0.01		0.43	99.59	74.7895	9.96567
HYZ3	Sp	Huinan	Liu (2014)	0.08	0.38	39.82	27.52	12.41	0.18	19.13		0.03		0.34	99.89	73.3177	31.6864
HYZ4	Sp	Huinan	Liu (2014)	0.09	0.38	38.97	27.97	12.61	0.17	18.8		0.02	0.01	0.29	99.31	72.6595	32.5101
HYZ5	Sp	Huinan	Liu (2014)	0.06	0.12	57.54	9.81	10.99	0.11	20.4			0.01	0.37	99.41	76.7919	10.2675
HYZ6	Sp	Huinan	Liu (2014)	0.07	0.36	38.59	29.48	13.5	0.17	17.44	0.01	0.02		0.28	99.92	69.7226	33.8934
HYZ7	Sp	Huinan	Liu (2014)	0.08	0.35	40.67	27.19	12.44	0.12	18.74	0.01		0.01	0.31	99.92	72.8651	30.9724
HYZ8	Sp	Huinan	Liu (2014)	0.06	0.2	41.79	26.36	12.8	0.15	18.13	0.02			0.32	99.83	71.6297	29.7428
HQL1	Sp	Huinan	Liu (2014)	0.13	0.19	42.69	24.27	12.74	0.13	19.05		0.01	0.01	0.33	99.55	72.7181	27.618
HQL2	Sp	Huinan	Liu (2014)	0.05	0.11	52.86	13.66	11.34	0.1	19.24	0.03	0.02	0.01	0.38	97.8	75.1514	14.7802
HQL3	Sp	Huinan	Liu (2014)	0.13	0.16	49.05	16.86	12.45	0.11	20.35				0.37	99.48	74.4484	18.745
HQL4	Sp	Huinan	Liu (2014)	0.07	0.27	45.93	19.35	14.23	0.14	19.07	0.02			0.32	99.4	70.4914	22.0425
HQL5	Sp	Huinan	Liu (2014)	0.13	0.24	55.72	9.9	12	0.12	20.82	0.03	0.08	0.03	0.42	99.49	75.5664	10.6541
HNd065	Sp	Huinan	Lin et al. (2019)		0.29025	35.2602	32.2065	13.236	0.20125	17.9318					99.158	70.717	37.9937
HNd066	Sp	Huinan	Lin et al. (2019)	0.0445	0.0935	45.824	21.271	11.7572	0.1445	19.3798					98.5367	74.6078	23.7453
HNd067	Sp	Huinan	Lin et al. (2019)	0.0376	0.3906	33.3882	34.3516	13.251	0.1912	17.4022		0.0264			99.047	70.068	40.8463
HNd068	Sp	Huinan	Lin et al. (2019)	0.0395	0.405	31.7017	35.8957	13.2773	0.19125	17.201					98.7373	69.7835	43.1798
HNd069	Sp	Huinan	Lin et al. (2019)	0.0595	0.30475	35.476	32.452	13.031	0.19	17.9078		0.0303333			99.4615	70.9333	38.0397
HNd071	Sp	Huinan	Lin et al. (2019)	0.0412	0.2632	31.2684	37.1046	13.4032	0.2158	16.9822		0.05875			99.3516	69.3106	44.3336
HNd074	Sp	Huinan	Lin et al. (2019)	0.09	0.146	39.028	28.289	12.666	0.167	18.715					99.101	72.4811	32.7165
HNd075	Sp	Huinan	Lin et al. (2019)	0.0414	0.276	43.9894	23.5594	11.6896	0.1564	19.1028					98.8398	74.4442	26.4406
HNd072	Sp	Huinan	Lin et al. (2019)	0.03775	0.102	47.9552	19.361	11.987	0.1695	19.4782					99.1145	74.3368	21.3195
HNd077	Sp	Huinan	Lin et al. (2019)	0.0722	0.2004	42.8776	24.275	12.2846	0.1534	18.9598					98.843	73.3415	27.5345
HNd085	Sp	Huinan	Lin et al. (2019)	0.07475	0.52475	42.6013	23.7972	12.6205	0.15275	19.0153					98.8165	72.8686	27.2677
HNd087	Sp	Huinan	Lin et al. (2019)	0.0775	0.4395	46.2578	19.4833	12.996	0.147	19.4375					98.852	72.7229	22.0382
J001*	Sp	Huinan	Lin et al. (2019)	0.14	0.22	54.76	11.36	11.77	0.1	20.89					99.27	76.2	12.2214
J079*	Sp	Huinan	Lin et al. (2019)	0.1	0.25	55.35	12.28	10.63	0.08	20.8					99.5	77.9	12.9603
J082*	Sp	Huinan	Lin et al. (2019)	0.11	0.23	56.18	10.22	11.58	0.09	21.02					99.45	76.57	10.8807
J083*	Sp	Huinan	Lin et al. (2019)	0.07	0.1	52	15.08	12.35	0.11	19.7					99.42	74.2	16.2923
J193*	Sp	Huinan	Lin et al. (2019)	0.16	0.19	56.63	9.61	11.43	0.08	21.18					99.29	76.93	10.2247
J197*	Sp	Huinan	Lin et al. (2019)	0.11	0.12	57.74	9.01	11.16	0.09	21.12					99.36	77.3	9.48004
J198*	Sp	Huinan	Lin et al. (2019)	0.13	0.19	57.81	9.23	10.86	0.09	21.32					99.66	77.9	9.67849
J206*	Sp	Huinan	Lin et al. (2019)	0.06	0.14	52.29	15.65	11.67	0.1	19.94		0.03			99.88	75.5	16.727
J247*	Sp	Huinan	Lin et al. (2019)	0.06	0.13	53.39	13.47	11.66	0.12	20.53					99.41	76	14.4807
J294*	Sp	Huinan	Lin et al. (2019)
J328*	Sp	Huinan	Lin et al. (2019)	0.11	0.15	56.33	10.62	11.2	0.09	20.83					99.37	77	11.232
J300*	Sp	Huinan	Lin et al. (2019)	0.13	0.22	60.51	4.97	12.05	0.08	21.4					99.37	76.2	5.22448
J301*	Sp	Huinan	Lin et al. (2019)	0.15	0.32	60.63	4.99	12.02	0.08	21.01					99.22	75.9	5.23456
J298*	Sp	Huinan	Lin et al. (2019)	0.13	0.23	41.59	24.96	13.52	0.15	18.7					99.29	71.3	28.7132
J230*	Sp	Huinan	Lin et al. (2019)	0.1	0.2	48.49	17.55	14.47	0.13	18.47					99.45	69.7	19.5435
J297*	Sp	Huinan	Lin et al. (2019)	0.13	0.42	56.81	8.32	13.1	0.1	20.55					99.46	73.85	8.94949
LG01	Sp	Huinan	Xu et al. (2019)	0.1296	0.1312	50.9494	17.4906	10.9546	0.125	20.0516	0.0082	0.0298	0.0108	0.3452	100.226	76.5414	18.7256
LG02	Sp	Huinan	Xu et al. (2019)	0.1888	0.1056	56.2308	12.2426	11.0456	0.1248	20.563	0.0114	0.0236	0.0182	0.3536	100.908	76.8437	12.7493
LG03	Sp	Huinan	Xu et al. (2019)	0.127	0.299	52.697	12.745	15.637	0.117	19.237	0.007	0.015	0	0.412	101.293	68.6809	13.9652
LG04	Sp	Huinan	Xu et al. (2019)	0.113	0.247	53.261	11.532	16.114	0.119	18.935	0.003	0.015	0	0.346	100.685	67.6858	12.6878
LG05	Sp	Huinan	Xu et al. (2019)	0.094	0.285	53.291	11.252	16.432	0.137	19.142	0	0.005	0.015	0.337	100.99	67.4959	12.4119
LG06	Sp	Huinan	Xu et al. (2019)	0.066	0.151	57.004	10.247	11.673	0.121	21.412	0	0.019	0.017	0.394	101.104	76.5795	10.7657
LG07	Sp	Huinan	Xu et al. (2019)	0.074	0.128	56.671	10.248	11.717	0.098	21.02	0	0.009	0.029	0.39	100.384	76.1783	10.823
LG08	Sp	Huinan	Xu et al. (2019)	0.006	0.14	58.453	9.565	11.11	0.106	20.908	0.01	0	0.032	0.348	100.718	77.0358	9.89559
LG09	Sp	Huinan	Xu et al. (2019)	0.204	0.325	40.931	27.447	13.17	0.184	19.054	0.014	0.017	0.006	0.188	101.54	72.0588	31.0368
LG10	Sp	Huinan	Xu et al. (2019)	0.089	0.302	42.885	25.499	12.576	0.171	19.227	0.019	0	0.016	0.238	101.022	73.1564	28.5233
LG01	Sp	Huinan	Xu et al. (2020)	0.06	0.12	55.82	10.24	11.88	0.1	20.45	0	0.01	0	0.01	98.69	75.4206	10.9578
LG02	Sp	Huinan	Xu et al. (2020)	0.03	0.12	57.95	9.42	11.3	0.1	20.34	0	0	0	0.01	99.27	76.2391	9.83252
LG03	Sp	Huinan	Xu et al. (2020)	0.11	0.24	52.48	11.43	16.47	0.11	18.48	0	0	0	0	99.32	66.6677	12.7481
LG04	Sp	Huinan	Xu et al. (2020)	0.02	0.09	55.61	12.05	11.36	0.1	19.98	0	0.01	0	0	99.22	75.8171	12.6914
LG05	Sp	Huinan	Xu et al. (2020)	0.03	0.09	55.41	12.08	11.1	0.11	20.03	0	0	0	0	98.85	76.2843	12.759
LG06	Sp	Huinan	Xu et al. (2020)	0.01	0.08	55.88	11.96	11.32	0.11	20.27	0	0	0	0	99.63	76.1445	12.5553
LG07	Sp	Huinan	Xu et al. (2020)	0.05	0.13	57.92	8.79	12.23	0.11	20.16	0	0.01	0	0	99.4	74.6088	9.24001
LG08	Sp	Huinan	Xu et al. (2020)	0.05	0.09	37.79	30.02	12.83	0.18	18.07	0.01	0.01	0	0	99.05	71.5147	34.7645
LG09	Sp	Huinan	Xu et al. (2020)	0.03	0.1	50.7	17.48	11.14	0.12	19.66	0	0	0	0.01	99.24	75.8796	18.7842
LG11	Sp	Huinan	Xu et al. (2020)	0.07	0.16	56.79	9.89	11.43	0.1	20.58	0	0.01	0	0.01	99.04	76.2444	10.4606
LG12	Sp	Huinan	Xu et al. (2020)	0.01	0.06	57.12	10.32	11.55	0.11	19.98	0	0.01	0	0	99.16	75.5117	10.81
LG13	Sp	Huinan	Xu et al. (2020)	0.03	0.05	57.75	9.45	11.43	0.12	20.06	0	0.01	0	0	98.9	75.7777	9.89152
HY1-01	Sp	Kuandian	Wu et al. (2006)	0.1	0.21	44.29	22.68	10.86	0.2	20.4	0.06	0.08	0.02	0.21	99.11	77.0033	25.5775
HY2-01	Sp	Kuandian	Wu et al. (2006)	0.14	0.05	47.45	19.51	11.35	0.17	20.08	0	0	0	0.3	99.05	75.9247	21.6273
HY2-02	Sp	Kuandian	Wu et al. (2006)	0.08	0.11	56.4	9.82	10.89	0.12	21.01	0.03	0.03	0.07	0.38	98.94	77.4727	10.4629
HY2-03	Sp	Kuandian	Wu et al. (2006)	0.03	0.07	56.31	11.21	10.37	0.13	20.79	0	0.03	0	0.24	99.18	78.1359	11.7862
HY2-04	Sp	Kuandian	Wu et al. (2006)	0.06	0.03	57.6	10.28	10.65	0.17	21.12	0	0.03	0.03	0.33	100.3	77.9492	10.6968
HY2-05	Sp	Kuandian	Wu et al. (2006)	0.02	0.23	43.29	25.73	12.08	0.29	19.41	0	0.04	0.03	0.3	101.42	74.1213	28.5155
HY2-06	Sp	Kuandian	Wu et al. (2006)	0.01	0.12	53.83	14.15	11.62	0.17	20.25	0	0	0.01	0.27	100.43	75.6479	14.9964
HY2-07	Sp	Kuandian	Wu et al. (2006)	0.08	0.26	56.02	9.55	11.73	0.17	21.48	0	0	0	0.24	99.53	76.549	10.2667
HY2-14	Sp	Kuandian	Wu et al. (2006)	0.07	0.2	49.63	17.67	11.26	0.16	20.63	0	0	0.02	0.36	100	76.5583	19.2866
HY2-29	Sp	Kuandian	Wu et al. (2006)	0.09	0.18	58.61	8.67	10.87	0.06	22.34	0	0	0	0.38	101.2	78.5569	9.03143
DCT1	Sp	Kuandian	Wang et al. (2013)	0.03	0.35	41.05	23.99	17.47	0.16	16.33					99.38	62.4939	28.1632
DCT2	Sp	Kuandian	Wang et al. (2013)	0.05	0.11	50.95	17.73	10.94	0.11	19.81					99.7	76.3472	18.9262
DCT3	Sp	Kuandian	Wang et al. (2013)	0.01	0.1	53.6	14.82	10.48	0.12	20.08					99.21	77.3521	15.6461
DCT5	Sp	Kuandian	Wang et al. (2013)	0.09	0.23	57.54	9.34	10.25	0.08	21.72					99.25	79.0676	9.81986
DCT8	Sp	Kuandian	Wang et al. (2013)	0.07	0.16	56.02	11.75	9.57	0.09	20.93					98.59	79.5857	12.335
DCT9	Sp	Kuandian	Wang et al. (2013)	0.11	0.29	52.07	14.62	10.96	0.1	20.74					98.89	77.1334	15.8501
HYS1	Sp	Kuandian	Wang et al. (2013)	0.01	0.1	59.38	8.36	10.05	0.08	20.81					98.79	78.6828	8.62957
HYS4	Sp	Kuandian	Wang et al. (2013)	0.04	0.09	58.87	8.62	11.06	0.07	20.02					98.77	76.3406	8.94414
HYS2	Sp	Kuandian	Wang et al. (2013)	0.02	0.08	56.76	11.58	10.35	0.11	20.5					99.4	77.9282	12.0386
HYS7	Sp	Kuandian	Wang et al. (2013)	0.01	0.1	58.22	8.76	11.27	0.1	20.98					99.44	76.8431	9.16826
HYS13	Sp	Kuandian	Wang et al. (2013)	0.13	0.32	53.38	12.48	13.94	0.13	19.18					99.56	71.0364	13.5575
HYS14	Sp	Kuandian	Wang et al. (2013)	0.05	0.06	50.43	18.23	11.26	0.15	19.71					99.89	75.7297	19.5172
HYS24	Sp	Kuandian	Wang et al. (2013)
HYS26	Sp	Kuandian	Wang et al. (2013)	0.05	0.17	59.17	8.12	10.23	0.04	21.19					98.97	78.6885	8.42996
QYS8	Sp	Kuandian	Wang et al. (2013)	0.05	0.49	52.08	14.91	13.55	0.16	18.79					100.03	71.1973	16.1112
QYS10	Sp	Kuandian	Wang et al. (2013)	0.09	0.1	58.48	10.01	10.33	0.08	20.46					99.55	77.9278	10.3
QYS14	Sp	Kuandian	Wang et al. (2013)	0.03	0.48	54.21	14.16	11.16	0.11	19.83					99.98	76.0041	14.9101
QYS15	Sp	Kuandian	Wang et al. (2013)	0.21	0.28	51.28	15.64	11.27	0.16	19.77					98.61	75.7692	16.9849
QYS18	Sp	Kuandian	Wang et al. (2013)	0.08	0.13	54.68	12.91	11.39	0.13	20.34					99.66	76.0951	13.6729
KCT1	Sp	Kuandian	Liu (2014)	0.03	0.12	51.06	17.88	11.06	0.14	19.38		0.01	0.01	0.31	100	75.7487	19.0296
KCT2	Sp	Kuandian	Liu (2014)	0.05	0.09	52.73	14.64	10.4	0.16	20.96	0.02	0.01		0.37	99.43	78.2255	15.707
KCT3	Sp	Kuandian	Liu (2014)	0.11	0.34	40.01	23.83	16.91	0.17	16.83				0.29	98.49	63.9525	28.5579
KCT4	Sp	Kuandian	Liu (2014)	0.09	0.27	57.53	9.35	9.83	0.09	21.75			0.01	0.41	99.33	79.7739	9.83497
KCT5	Sp	Kuandian	Liu (2014)	0.04	0.14	56.44	11.09	9.27	0.08	20.87		0.01	0.01	0.39	98.34	80.0525	11.651
KCT6	Sp	Kuandian	Liu (2014)	0.19	0.29	51.94	14.64	10.94	0.13	20.68	0.02	0.04	0.03	0.39	99.29	77.1145	15.9079
KHY1	Sp	Kuandian	Liu (2014)	0.01	0.08	59.37	8.31	10.03	0.09	20.81			0.01	0.44	99.15	78.7161	8.58733
KHY2	Sp	Kuandian	Liu (2014)	0.01	0.09	58.45	8.75	10.91	0.12	20.42		0.06		0.42	99.23	76.9392	9.12983
KHY3	Sp	Kuandian	Liu (2014)	0.46	0.22	51.13	15.39	10.89	0.1	20.2	0.06	0.11	0.02	0.31	98.89	76.7792	16.8063
KHY4	Sp	Kuandian	Liu (2014)		0.1	58.32	8.96	11.07	0.07	20.38	0.01			0.4	99.31	76.6448	9.34735
KHY5	Sp	Kuandian	Liu (2014)	0.15	0.27	53.64	12.3	13.66	0.11	19.45	0.01	0.02		0.33	99.94	71.7364	13.3373
KHY6	Sp	Kuandian	Liu (2014)	0.08	0.18	55.98	10.63	12.37	0.09	19.91	0.01			0.36	99.61	74.1541	11.3038
KHY7	Sp	Kuandian	Liu (2014)	0.01	0.09	58.91	8.53	10.47	0.1	20.61				0.43	99.15	77.8217	8.85727
KHY8	Sp	Kuandian	Liu (2014)	0.07	0.16	58.87	8.02	10.3	0.08	21.05	0.01	0.04	0.01	0.41	99.02	78.4621	8.37725
KQS1	Sp	Kuandian	Liu (2014)	0.08	1.34	41.04	18.03	22.82	0.24	15.18	0.04	0.01		0.26	99.04	54.2494	22.7712
KQS2	Sp	Kuandian	Liu (2014)	0.11	0.56	53.57	12.44	12.3	0.11	20.09			0.01	0.36	99.55	74.4344	13.4838
KQS3	Sp	Kuandian	Liu (2014)	0.05	0.44	52.17	14.24	10.91	0.1	20.75		0.01		0.4	99.07	77.2224	15.4829
KQS4	Sp	Kuandian	Liu (2014)	0.07	0.17	54.33	12.87	11.33	0.11	20.41	0.02		0.01	0.3	99.62	76.2533	13.7176
KQS5	Sp	Kuandian	Liu (2014)	0.09	0.28	52.28	15.54	11.33	0.11	20.33		0.03		0.4	100.39	76.1821	16.6316
far-eastern Russia (FEE)
R42-5	Sp	Sviyagin	Guo et al. (2017)	0.04	0.13	57.51	10.04	10.85	0.08	19.73	0.01	0	0.01	0.38	98.78	76.4232	10.4879
R42-6	Sp	Sviyagin	Guo et al. (2017)	0.01	0.12	43.97	25.1	11.5	0.1	18.4	0.01	0	0	0.23	99.45	74.04	27.6997
R42-7	Sp	Sviyagin	Guo et al. (2017)	0	0.1	57.61	10.01	10.69	0.08	19.37	0	0	0	0.38	98.23	76.359	10.4436
R42-8	Sp	Sviyagin	Guo et al. (2017)	0.02	0.07	57.02	10.09	10.81	0.09	20.02	0.01	0.01	0	0.38	98.54	76.751	10.6156
R42-9	Sp	Sviyagin	Guo et al. (2017)	0.06	0.13	58.42	9.81	10.26	0.08	20.11	0.01	0	0.01	0.36	99.25	77.7475	10.1285
R42-10	Sp	Sviyagin	Guo et al. (2017)	0.02	0.07	59.04	8.56	10.69	0.1	19.88	0.01	0	0	0.38	98.75	76.8249	8.86782
R42-11	Sp	Sviyagin	Guo et al. (2017)	0.04	0.11	57.28	9.99	10.77	0.07	19.91	0.01	0	0	0.38	98.56	76.7189	10.4787
R42-12	Sp	Sviyagin	Guo et al. (2017)	0.03	0.1	57.19	10.1	10.71	0.09	19.84	0	0.01	0	0.38	98.46	76.7557	10.5967
Sv-1	Sp	Sviyagin	Ionov et al. (2020)	0.0675	0.081	57.4455	10.18	11.025	0.115	20.7315				0.336	100.013	77.0217	10.6293
Sv-2	Sp	Sviyagin	Ionov et al. (2020)	0.1455	0.1025	58.3665	9.77	10.7775	0.09	20.056				0.3215	99.6475	76.8367	10.0997
Sv-4	Sp	Sviyagin	Ionov et al. (2020)	0.111	0.0925	55.5255	12.5745	11.1825	0.143	20.4975				0.308	100.461	76.5666	13.1937
Sv-7	Sp	Sviyagin	Ionov et al. (2020)	0.121	0.089	52.932	15.5005	11.278	0.099	20.098				0.29	100.416	76.0571	16.4255
Sv-8	Sp	Sviyagin	Ionov et al. (2020)	0.0575	0.0625	56.045	12.4085	11.229	0.1365	20.0435				0.3565	100.343	76.0869	12.937
Sv-9	Sp	Sviyagin	Ionov et al. (2020)	0.0776667	0.0856667	59.2737	8.01967	11.5243	0.101	20.6603				0.395333	100.217	76.166	8.32463
Sv-12	Sp	Sviyagin	Ionov et al. (2020)	0.046	0.1095	58.3615	9.8055	11.0375	0.119	20.924				0.35	100.767	77.1649	10.1335
Sv-13	Sp	Sviyagin	Ionov et al. (2020)	0.0415	0.075	57.734	9.909	11.8755	0.114	20.0625				0.343	100.178	75.0714	10.3292
Sv-14	Sp	Sviyagin	Ionov et al. (2020)	0.025	0.0436667	51.026	17.2847	11.9773	0.137667	19.3517				0.292	100.169	74.2272	18.5234
Sv-15	Sp	Sviyagin	Ionov et al. (2020)	0.031	0.0625	57.38	10.4435	11.168	0.0685	20.5585				0.3635	100.076	76.6431	10.8856
Sv-16	Sp	Sviyagin	Ionov et al. (2020)	0.046	0.12	58.523	9.2515	11.9445	0.1275	20.341				0.3685	100.759	75.2206	9.59202
Sv-17	Sp	Sviyagin	Ionov et al. (2020)	0.0845	0.09	54.812	13.7375	10.9375	0.1075	20.5295				0.291	100.595	76.9894	14.3989
Sv-18	Sp	Sviyagin	Ionov et al. (2020)	0.103	0.165	56.173	11.315	11.433	0.052	20.57				0.361	100.184	76.2308	11.909
Sv-19	Sp	Sviyagin	Ionov et al. (2020)	0.107	0.1	58.466	9.64	10.848	0.044	20.696				0.355	100.265	77.2768	9.96346
Sv-20	Sp	Sviyagin	Ionov et al. (2020)	0.101	0.12	52.326	16.204	11.127	0.111	19.821				0.317	100.15	76.0498	17.2074
Sv-21	Sp	Sviyagin	Ionov et al. (2020)	0.101	0.13	58.058	9.442	10.411	0.099	21.379				0.323	99.948	78.543	9.84078
Sv-22	Sp	Sviyagin	Ionov et al. (2020)	0.16	0.125	57.888	9.946	11.531	0.098	20.247				0.375	100.375	75.7866	10.3391
Sv-24	Sp	Sviyagin	Ionov et al. (2020)	0.043	0.158	57.714	9.93	11.316	0.176	20.862				0.324	100.523	76.6698	10.352
Sv-27	Sp	Sviyagin	Ionov et al. (2020)	0.053	0.107	57.038	11.337	10.279	0.118	20.63				0.33	99.926	78.1544	11.7698
Sv-28	Sp	Sviyagin	Ionov et al. (2020)	0.0705	0.1135	58.129	9.8055	10.761	0.098	20.6805				0.337	100.025	77.4048	10.1699
Sv-29	Sp	Sviyagin	Ionov et al. (2020)	0.095	0.151	59.0495	8.8045	10.9555	0.064	21.016				0.34	100.506	77.3729	9.09674
Sv-32	Sp	Sviyagin	Ionov et al. (2020)	0.2995	0.1475	45.1325	22.843	12.193	0.1575	17.9825				0.2445	99.009	72.4438	25.3558
Sv-36	Sp	Sviyagin	Ionov et al. (2020)	0.383	0.063	53.985	13.718	11.257	0.146	19.479				0.323	99.366	75.5173	14.5696
Pod-1	Sp	Podgelban	Ionov et al. (2020)	0.35	0.1025	56.8435	12.502	11.3215	0.119	19.702				0.347	101.297	75.6219	12.8624
Pod-2	Sp	Podgelban	Ionov et al. (2020)
Pod-3	Sp	Podgelban	Ionov et al. (2020)	0.273	0.179	57.7465	8.999	12.0275	0.1245	20.465				0.3875	100.217	75.2048	9.46859
Pod-4	Sp	Podgelban	Ionov et al. (2020)	0.259	0.1605	56.968	10.177	11.776	0.128	20.402				0.3875	100.273	75.5399	10.706
Pod-5	Sp	Podgelban	Ionov et al. (2020)	0.5195	0.096	58.2145	10.9515	11.5655	0.1195	19.86				0.3975	101.732	75.3753	11.2104
Sp, spinel; Mg# = 100×Mg/(Mg +Fetotal) molar; Cr# = 100×Cr/(Cr +Al) molar.
References
Guo, P., Xu, W. L., Wang, C. G., Wang, F., Ge, W. C., Sorokin, A. A. & Wang, Z. W. (2017). Age and evolution of the lithospheric mantle beneath the Khanka Massif: geochemical and Re–Os isotopic evidence from Sviyagino mantle xenoliths. Lithos 282-283, 326-338.
Guo, P., Ionov, D. A., Xu, W. L., Wang, C. G. & Luan, J. P. (2020). Mantle and recycled oceanic crustal components in mantle xenoliths from northeastern china and their mantle sources. Journal of Geophysical Research: Solid Earth 125.
Ionov, D. A., Guo, P., Nelson, W. R., Shirey, S. B. & Willbold, M. (2020). Paleoproterozoic melt-depleted lithospheric mantle in the Khanka block, far eastern Russia: Inferences for mobile belts bordering the North China and Siberian cratons. Geochimica et Cosmochimica Acta 270, 95-111.
Hao, Y. T., Xia, Q. K., Jia, Z. B., Zhao, Q. C., Li, P., Feng, M. & Liu, S. C. (2016). Regional heterogeneity in the water content of the Cenozoic lithospheric mantle of Eastern China. Journal of Geophysical Research: Solid Earth 121, 517-537.
Lin, A. B., Zheng, J. P., Xiong, Q., Aulbach, S., Lu, J. G., Pan, S. K., Dai, H. K. & Zhang, H. (2019). A refined model for lithosphere evolution beneath the decratonized northeastern North China Craton. Contributions to Mineralogy and Petrology 174, 15.
Liu, J. L. (2014). Comparative study on nature of subcontinental lithosphere mantle in northeastern margin of the North China Craton and Northeast Orogenic Belt. Doctoral thesis. (In Chinese with English abstract)
Pan, S. K., Zheng, J. P., Chu, L. L. & Griffin, W. L. (2013). Coexistence of the moderately refractory and fertile mantle beneath the eastern Central Asian Orogenic Belt. Gondwana Research 23, 176-189.
Pan, S. K., Zheng, J. P., Griffin, W. L., Xu, Y. X. & Li, X. Y. (2015). Nature and evolution of the lithospheric mantle beneath the eastern Central Asian Orogenic Belt: Constraints from peridotite xenoliths in the central part of the Great Xing'an Range, NE China. Lithos 238, 52-63.
Park, K., Choi, S. H., Cho, M. & Lee, D. C. (2017). Evolution of the lithospheric mantle beneath Mt. Baekdu (Changbaishan): Constraints from geochemical and Sr–Nd–Hf isotopic studies on peridotite xenoliths in trachybasalt. Lithos 286, 330-344.
Song, Y., Wang, J., Liu, J. L., Xie, Z. P. & Hattori, K. H. (2013). Mineral chemistry of mantle xenoliths in Cenozoic basalts from Wangqing, eastern Jilin: implications for formation of newly accreted sub-continental mantle earth. Science Frontiers 20, 96-107. (In Chinese with English abstract)
Tang, Y. J., Zhang, H. F., Deloule, E., Su, B. X., Ying, J. F., Xiao, Y. & Hu, Y. (2012). Slab-derived lithium isotopic signatures in mantle xenoliths from northeastern North China Craton. Lithos 149, 79-90.
Tian, G. C., Liu, J. G., Scott, J. M., Chen, L. H., Pearson, D. G., Chu, Z. Y., Wang, Z. C. & Luo Y. (2020). Architecture and evolution of the lithospheric roots beneath circum-cratonic orogenic belts–the Xing’an Mongolia Orogenic Belt and its relationship with adjacent North China and Siberian cratonic roots. Lithos (submitted).
Wang, J., Hattori, K. H. & Xie, Z. P. (2013). Oxidation state of lithospheric mantle along the northeastern margin of the North China Craton: implications for geodynamic processes. International Geology Review 55, 1418-1444.
Wu, F. Y., Walker, R. J., Yang, Y. H., Yuan, H. L. & Yang, J. H. (2006). The chemical-temporal evolution of lithospheric mantle underlying the North China Craton. Geochimica et Cosmochimica Acta 70, 5013-5034.
Xu, Q. H., Liu, J. Q., He, H. Y. & Zhang, Y. H. (2019). Nature and evolution of the lithospheric mantle revealed by water contents and He-Ar isotopes of peridotite xenoliths from Changbaishan and Longgang basalts in Northeast China. Science Bulletin 64, 1325-1335.
Xu, Q. H., Liu, J. Q., Mo, X. X., He, H. Y., Zhang, Y. H. & Zhao, W. B. (2020). Characteristics of the lithospheric mantle revealed by peridotite xenoliths from Changbaishan volcanic rocks. Acta Petrologica Sinica 36, 2047-2066. (In Chinese with English abstract)
Xu, Y. G., Ross, J. V. & Mercier, J. C. C. (1993). The upper mantle beneath the continental rift of Tanlu, Eastern China: evidence for the intra-lithospheric shear zones. Tectonophysics 225, 337-360.
Xu, Y. G., Menzies, M. A., Vroon, P., Mercier, J. C. & Lin, C. Y. (1998). Texture–temperature–geochemistry relationships in the upper mantle as revealed from spinel peridotite xenoliths from Wangqing, NE China. Journal of Petrology 39, 469-493.
Xu, Y. G., Menzies, M. A., Thirlwall, M. F., Huang, X. L., Liu, Y. & Chen, X. M. (2003). “Reactive” harzburgites from Huinan, NE China: products of the lithosphere-asthenosphere interaction during lithospheric thinning? Geochimica et Cosmochimica Acta 67, 487-505.
Yu, S. Y., Xu, Y. G., Huang, X. L., Ma, J. L., Ge, W. C., Zhang, H. H. & Qin, X. F. (2009). Hf–Nd isotopic decoupling in continental mantle lithosphere beneath Northeast China: effects of pervasive mantle metasomatism. Journal of Asian Earth Sciences 35, 554-570.
Zhang, M., Yang, J. H., Sun, J. F., Wu, F. Y. & Zhang, M. (2012). Juvenile subcontinental lithospheric mantle beneath the eastern part of the Central Asian Orogenic Belt. Chemical Geology 328, 109-122.
Zhang, Y. L (2011). Isotopic compositions of the peridotite xenoliths and age of the subcontinental lithospheric mantle in the Great Xing'an Range. Doctoral thesis. (In Chinese with English abstract)
Zhang, Y. L., Liu, C. Z., Ge, W. C., Wu, F. Y. & Chu, Z. Y. (2011). Ancient sub-continental lithospheric mantle (SCLM) beneath the eastern part of the Central Asian Orogenic Belt (CAOB): Implications for crust–mantle decoupling. Lithos 126, 233-247.
Zhang, Y. L., Ge, W. C., Sun, J., Yang, H., Liu, Z. C. & Liu, J. G. (2019). Age and composition of the subcontinental lithospheric mantle beneath the Xing'an–Mongolia Orogenic Belt: Implications for the construction of microcontinents during accretionary orogenesis. Lithos 326, 556-571.
Zhao, Y. W. & Fan, Q. C. (2011). Characteristics of lithospheric mantle beneath the Great Xing'an Range: evidence from spinel peridotite xenoliths in the Halaha River and Chaoer River area. Acta Petrologica Sinica 27, 2833-2841. (In Chinese with English abstract)
Zhou, Q., Wu, F. Y., Chu, Z. Y., Yang, Y. H., Sun, D. Y. & Ge, W. C. (2007). Sr-Nd-Hf-Os isotopic characterizations of the Jiaohe peridotite xenoliths in Jilin province and constraints on the lithospheric mantle age in northeastern China. Acta Petrologica Sinica 23, 1269-1280. (In Chinese with English abstract)
Zhou, Q., Wu, F. Y., Chu, Z. Y. & Ge, W. C. (2010). Isotopic compositions of mantle xenoliths and age of the lithospheric mantle in Yitong, Jilin Province. Acta Petrologica Sinica 26, 1241-1264. (In Chinese with English abstract)
